# Supplementary material for: BIS-4D: mapping soil properties and their uncertainties at 25 m resolution in the Netherlands
Source: Copernicus journal article supplement (doi:10.5194/essd-16-2941-2024), 2024-06-25
Supplement: Supplementary file 1 [file essd-16-2941-2024-supplement.pdf]

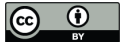

*Supplement of*

## **BIS-4D: mapping soil properties and their uncertainties at 25 m resolution in the Netherlands**

**Anatol Helfenstein et al.**

*Correspondence to:* Anatol Helfenstein ([anatol.helfenstein@bafu.admin.ch](mailto:anatol.helfenstein@bafu.admin.ch))

The copyright of individual parts of the supplement might differ from the article licence.

## Contents

|    |                                                       |            |
|----|-------------------------------------------------------|------------|
|    | <b>S1 Clay</b>                                        | <b>S2</b>  |
|    | S1.1 Prediction maps . . . . .                        | S2         |
|    | S1.2 Accuracy assessment . . . . .                    | S5         |
| 5  | S1.3 Variable importance . . . . .                    | S8         |
|    | <b>S2 Silt</b>                                        | <b>S9</b>  |
|    | S2.1 Prediction maps . . . . .                        | S9         |
|    | S2.2 Accuracy assessment . . . . .                    | S12        |
|    | S2.3 Variable importance . . . . .                    | S15        |
| 10 | <b>S3 Sand</b>                                        | <b>S16</b> |
|    | S3.1 Prediction maps . . . . .                        | S16        |
|    | S3.2 Accuracy assessment . . . . .                    | S19        |
|    | S3.3 Variable importance . . . . .                    | S22        |
|    | <b>S4 Bulk density (BD)</b>                           | <b>S23</b> |
| 15 | S4.1 Prediction maps . . . . .                        | S23        |
|    | S4.2 Accuracy assessment . . . . .                    | S26        |
|    | S4.3 Variable importance . . . . .                    | S29        |
|    | <b>S5 Soil organic matter (SOM)</b>                   | <b>S30</b> |
|    | S5.1 Prediction maps . . . . .                        | S30        |
| 20 | S5.2 Accuracy assessment . . . . .                    | S33        |
|    | S5.3 Variable importance . . . . .                    | S36        |
|    | <b>S6 pH</b>                                          | <b>S37</b> |
|    | S6.1 Prediction maps . . . . .                        | S37        |
|    | S6.2 Accuracy assessment . . . . .                    | S40        |
| 25 | S6.3 Variable importance . . . . .                    | S43        |
|    | <b>S7 Total N (<math>N_{tot}</math>)</b>              | <b>S44</b> |
|    | S7.1 Prediction maps . . . . .                        | S44        |
|    | S7.2 Accuracy assessment . . . . .                    | S47        |
|    | S7.3 Variable importance . . . . .                    | S50        |
| 30 | <b>S8 Oxalate-extractable P (<math>P_{ox}</math>)</b> | <b>S51</b> |
|    | S8.1 Prediction maps . . . . .                        | S51        |
|    | S8.2 Accuracy assessment . . . . .                    | S54        |
|    | S8.3 Variable importance . . . . .                    | S57        |
|    | <b>S9 Cation exchange capacity (CEC)</b>              | <b>S58</b> |
| 35 | S9.1 Prediction maps . . . . .                        | S58        |
|    | S9.2 Accuracy assessment . . . . .                    | S61        |
|    | S9.3 Variable importance . . . . .                    | S64        |



## S1 Clay

### S1.1 Prediction maps

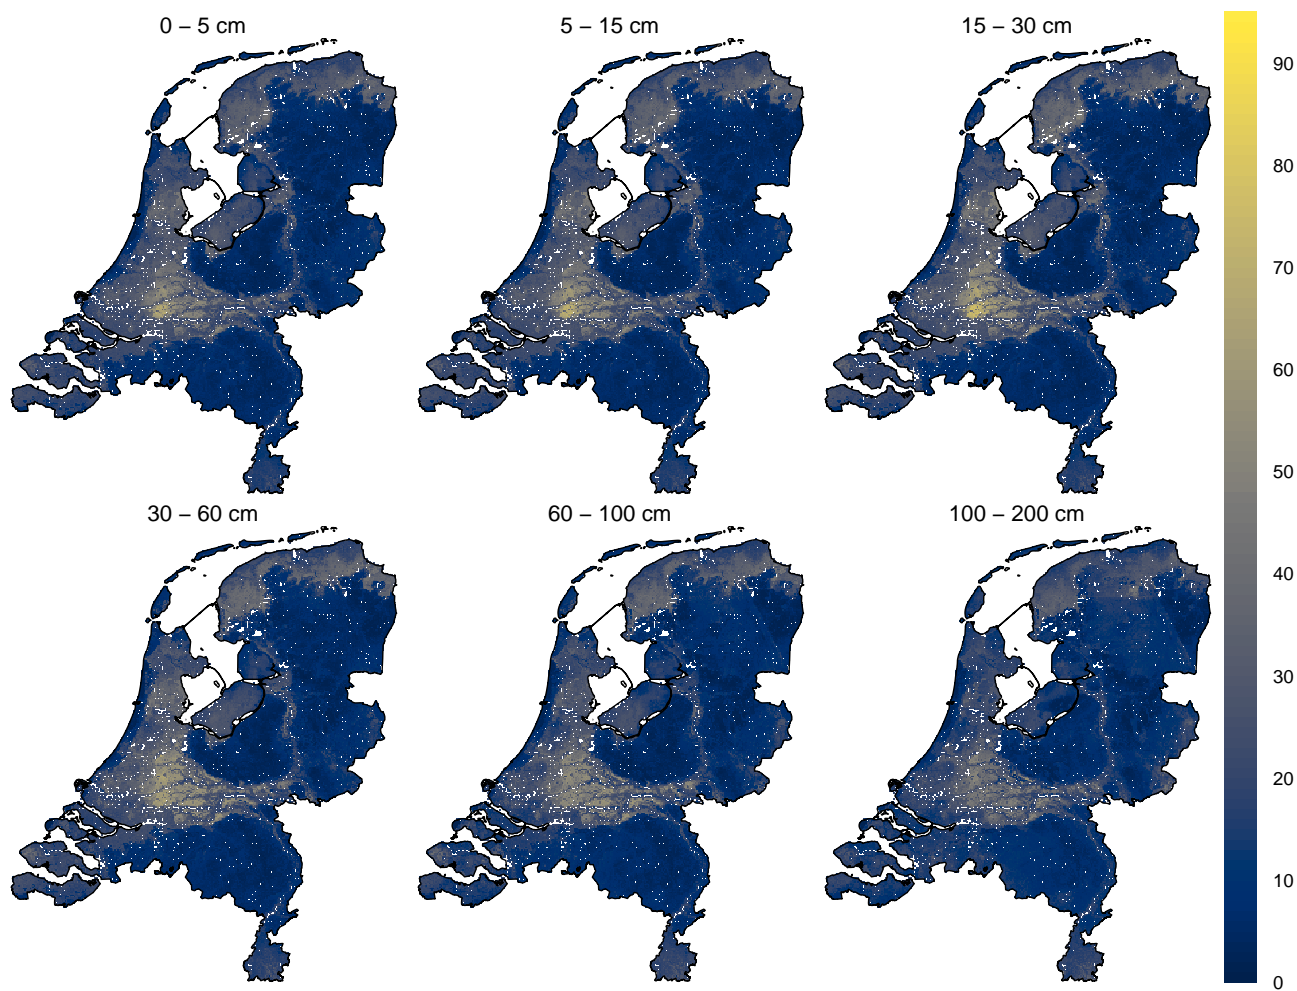

**Figure S1.** Predicted mean clay content [%] for every standard depth layer defined by *GlobalSoilMap* (GSM; Arrouays et al., 2015).

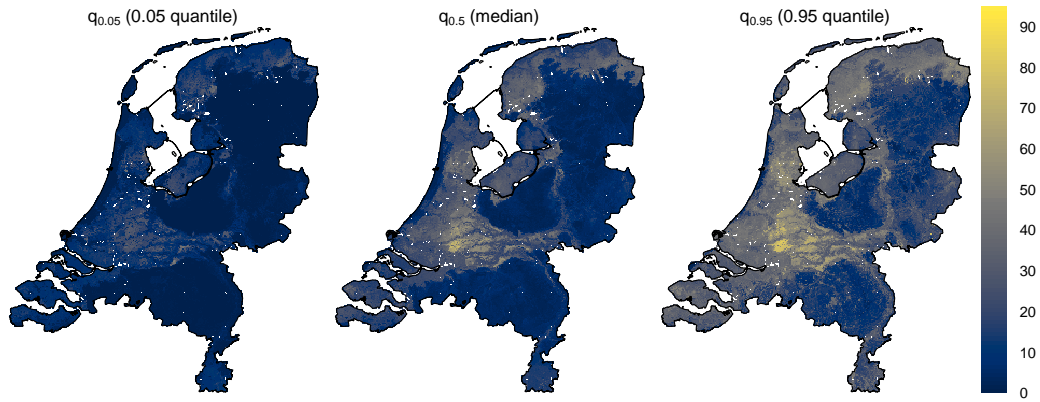

**Figure S2.** Predicted 5<sup>th</sup>, 50<sup>th</sup> (median) and 95<sup>th</sup> quantile for clay content [%] from 0–5 cm depth.

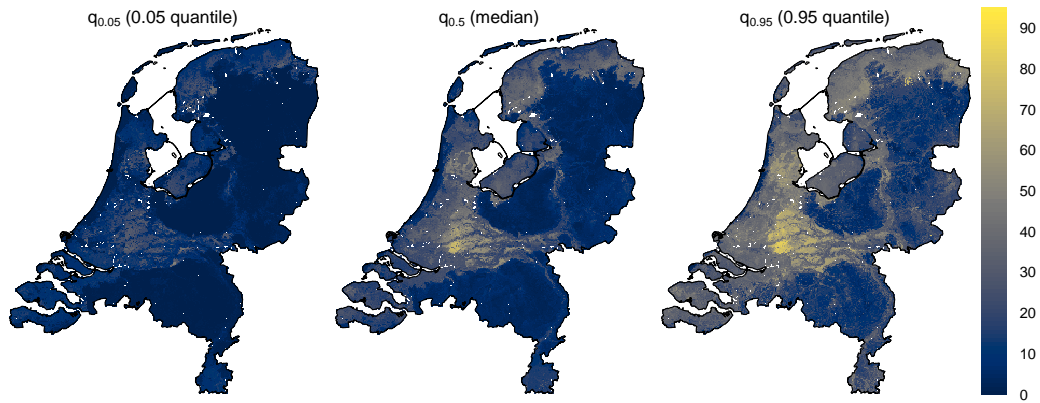

**Figure S3.** Predicted 5<sup>th</sup>, 50<sup>th</sup> (median) and 95<sup>th</sup> quantile for clay content [%] from 5–15 cm depth.

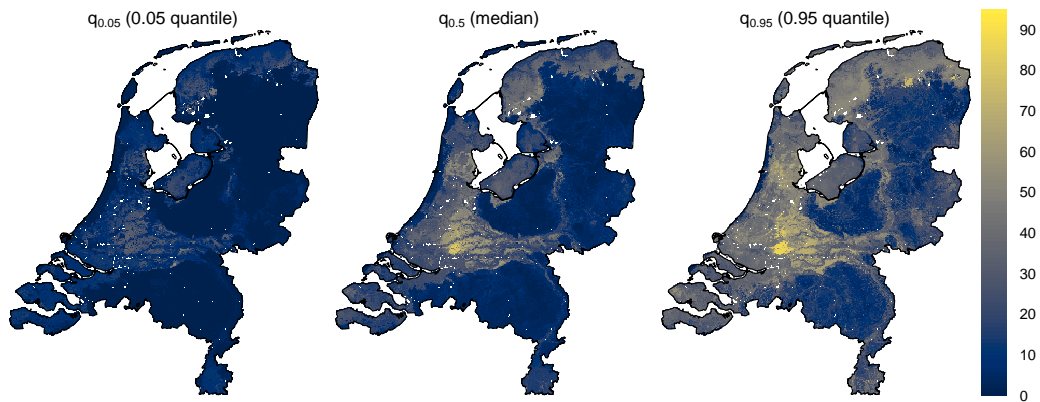

**Figure S4.** Predicted 5<sup>th</sup>, 50<sup>th</sup> (median) and 95<sup>th</sup> quantile for clay content [%] from 15–30 cm depth.

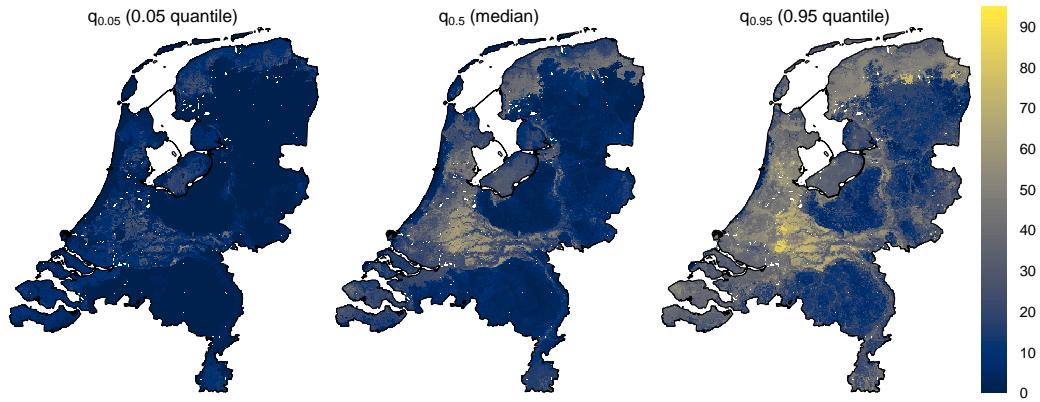

**Figure S5.** Predicted 5<sup>th</sup>, 50<sup>th</sup> (median) and 95<sup>th</sup> quantile for clay content [%] from 30–60 cm depth.

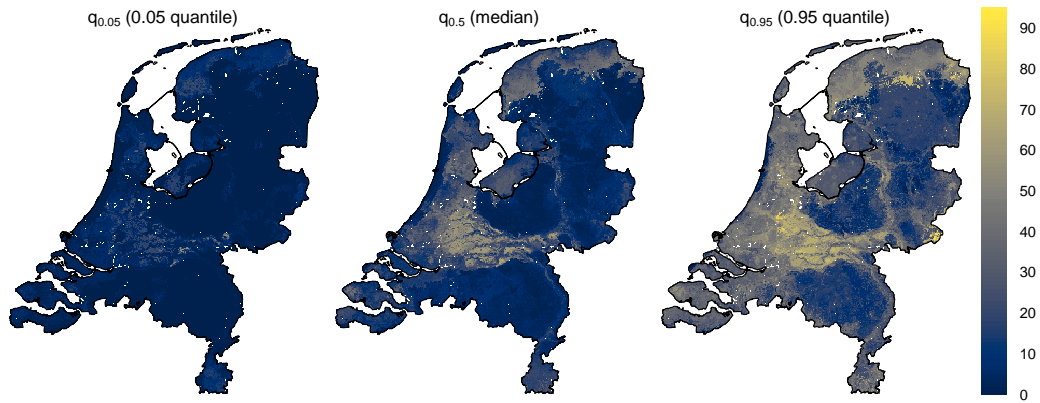

**Figure S6.** Predicted 5<sup>th</sup>, 50<sup>th</sup> (median) and 95<sup>th</sup> quantile for clay content [%] from 60–100 cm depth.

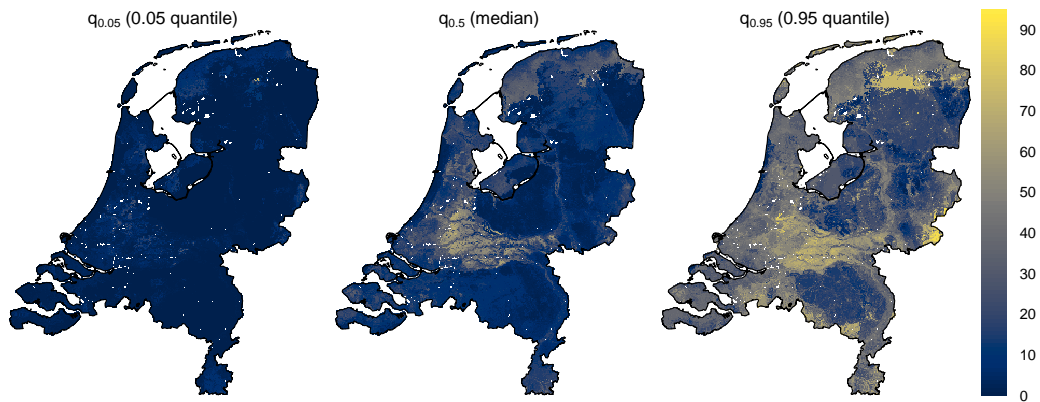

**Figure S7.** Predicted 5<sup>th</sup>, 50<sup>th</sup> (median) and 95<sup>th</sup> quantile for clay content [%] from 100–200 cm depth.

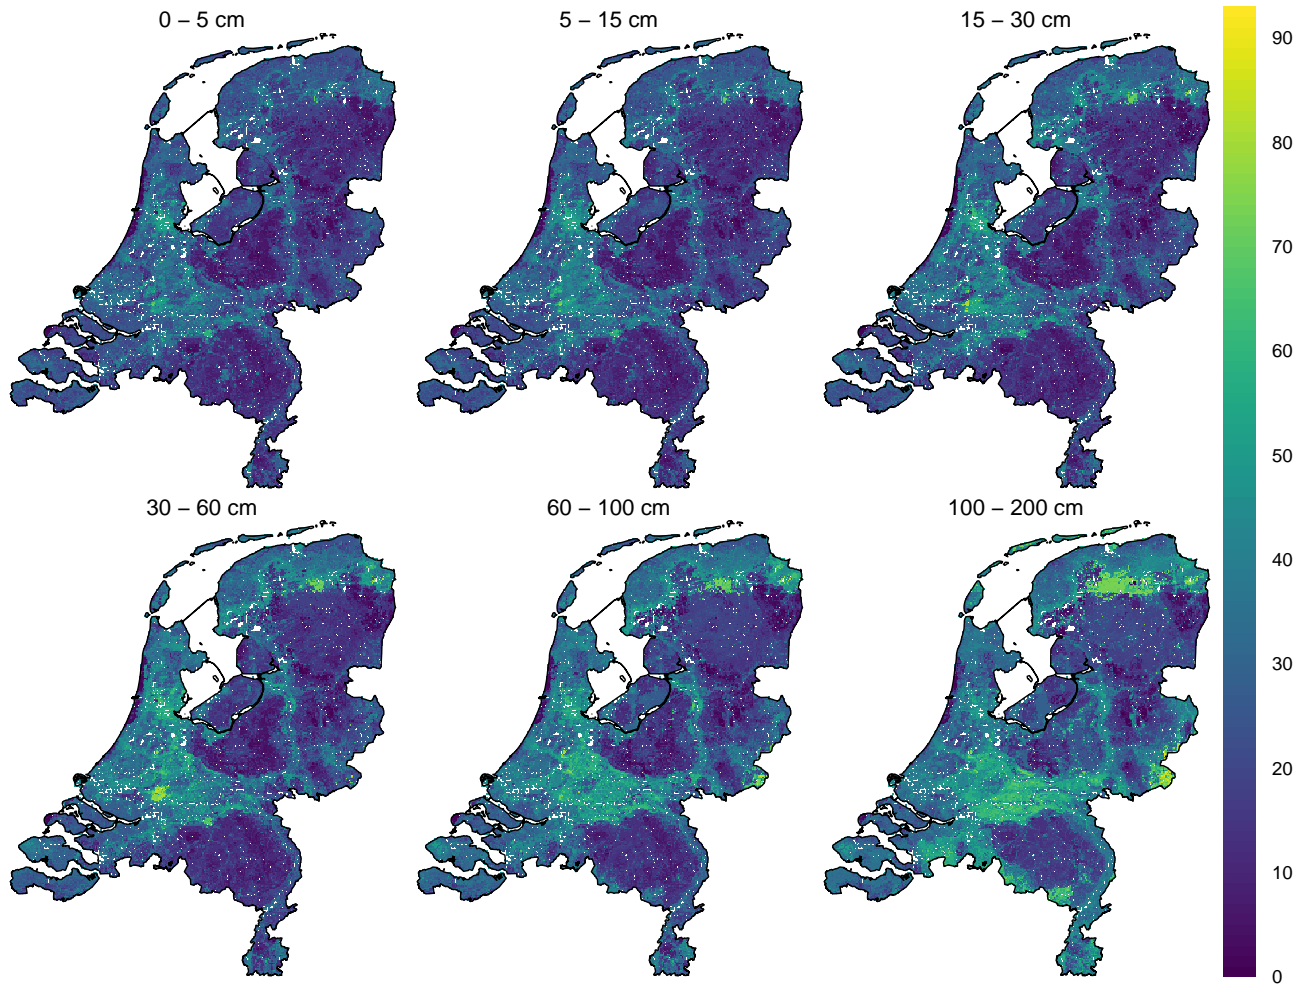

**Figure S8.** Maps of the 90<sup>th</sup> prediction interval width (PI90) as a measure of prediction uncertainty for clay content [%] for every GSM depth layer.

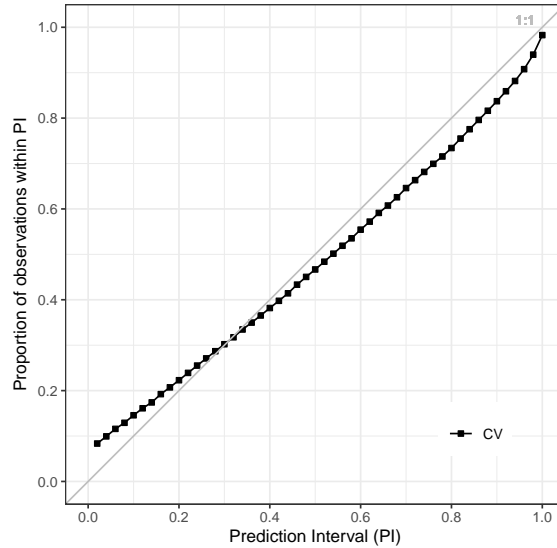

**Figure S9.** Prediction interval coverage probability (PICP) for prediction intervals between 0.02 and 1 of the PFB laboratory measurements used for 10-fold cross-validation (CV). The closer the points are to the 1:1 line, the more accurate the prediction uncertainty. Lines connecting the points do not represent actual data and are only for visual guidance.

**Table S1.** Model accuracy metrics of mean and median clay content [%] predictions using 10-fold cross-validation of PFB laboratory measurements (Sect. 2.6). Note that clay content was not measured in LSK or CCNL so design-based inference and computing 95 % confidence intervals (CI95) was not possible (Sect. 2.1.2). Here and in all other tables in the SI, we combined 0–5 cm and 5–15 cm depth layers and thereby deviate slightly from the GSM standard depth layers (Arrouays et al., 2015) because for several soil properties there were not enough observations available to statistically validate the 0–5 cm depth layer by itself. ME = mean error; RMSE = root mean squared error; MEC = model efficiency coefficient; PICP90 = prediction interval coverage probability of the PI90.

| Prediction | Depth (cm) | n    | ME           | CI95 of ME | RMSE        | CI95 of RMSE | MEC         | CI95 of MEC | PICP90      |
|------------|------------|------|--------------|------------|-------------|--------------|-------------|-------------|-------------|
| Mean       | 0 - 15     | 2986 | <b>0.07</b>  | -          | <b>6.25</b> | -            | <b>0.84</b> | -           | <b>0.86</b> |
|            | 15 - 30    | 1794 | <b>0.76</b>  | -          | <b>7.5</b>  | -            | <b>0.84</b> | -           | <b>0.83</b> |
|            | 30 - 60    | 3626 | <b>0.27</b>  | -          | <b>8.43</b> | -            | <b>0.77</b> | -           | <b>0.82</b> |
|            | 60 - 100   | 3241 | <b>-1.12</b> | -          | <b>8.79</b> | -            | <b>0.69</b> | -           | <b>0.84</b> |
|            | 100 - 200  | 1244 | <b>-1.56</b> | -          | <b>9.31</b> | -            | <b>0.6</b>  | -           | <b>0.83</b> |
| Median     | 0 - 15     | 2986 | <b>0.54</b>  | -          | <b>6.15</b> | -            | <b>0.84</b> | -           | <b>0.86</b> |
|            | 15 - 30    | 1794 | <b>1.1</b>   | -          | <b>7.22</b> | -            | <b>0.85</b> | -           | <b>0.83</b> |
|            | 30 - 60    | 3626 | <b>0.87</b>  | -          | <b>8.04</b> | -            | <b>0.79</b> | -           | <b>0.82</b> |
|            | 60 - 100   | 3241 | <b>-0.31</b> | -          | <b>8.32</b> | -            | <b>0.72</b> | -           | <b>0.84</b> |
|            | 100 - 200  | 1244 | <b>-0.39</b> | -          | <b>8.8</b>  | -            | <b>0.64</b> | -           | <b>0.83</b> |

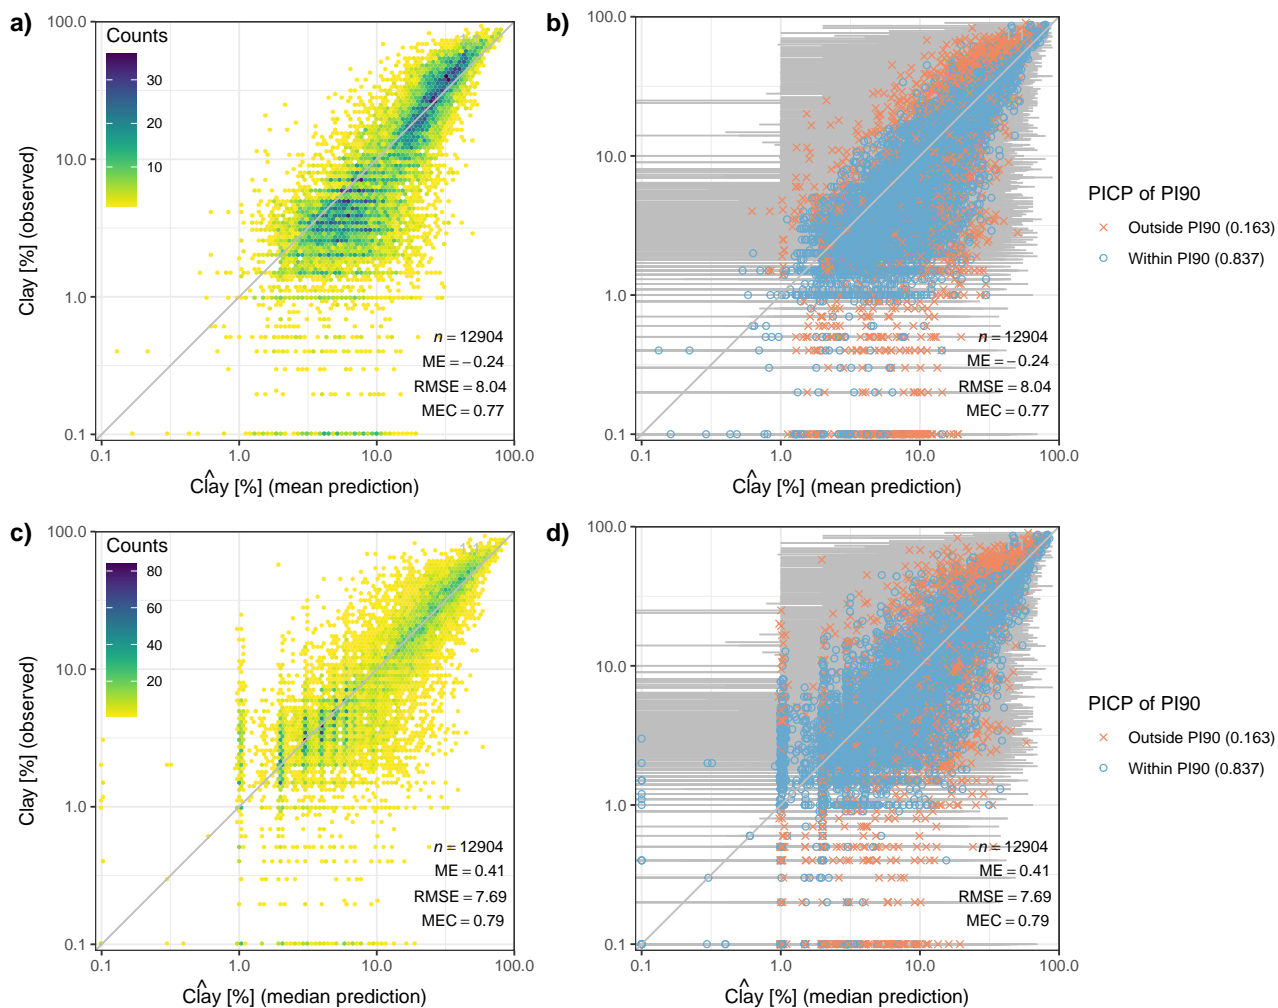

**Figure S10.** Predicted mean (a & b) and median (c & d) clay content [%] on the x-axis vs. measured clay content [%] on the y-axis (log-scale). Accuracy plots and metrics (ME, RMSE and MEC) were computed using 10-fold cross-validation of PFB laboratory measurements (Sect. 2.6). Plots a & c emphasize point density whereas plots b & d visualize prediction uncertainty (PI90 as error bars) and the PICIP90 in the figure legends.

### S1.3 Variable importance

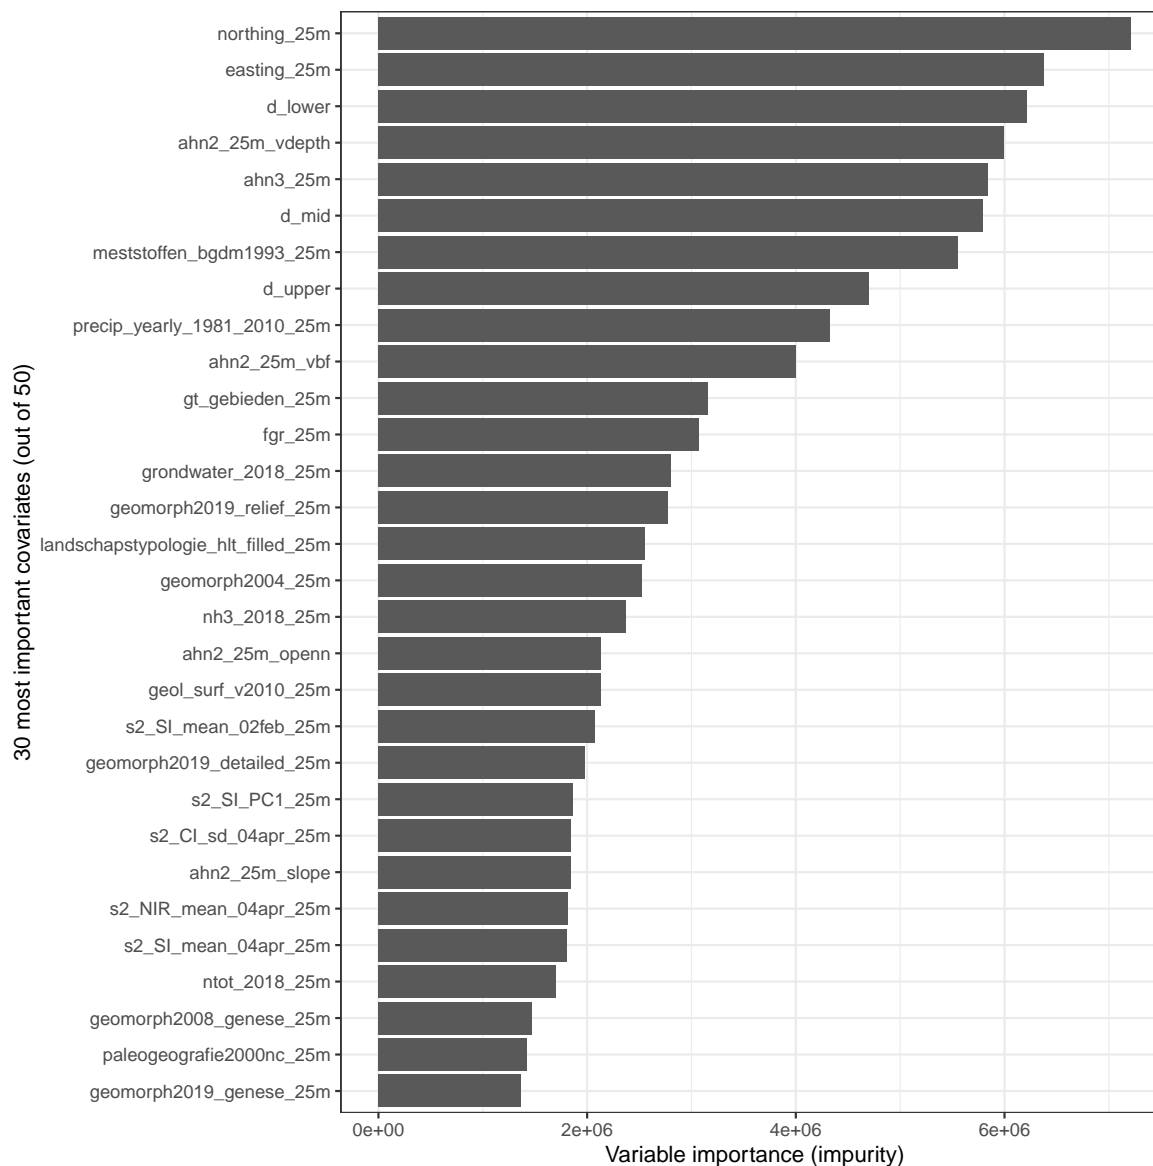

**Figure S11.** Variable importance for predicting clay content, assessed using the impurity method (Breiman, 2002) (Sect. 2.4). A description of the covariate names (y-axis) can be found in the model code (<https://git.wur.nl/helfe001/bis-4d>) and covariate dataset (Helfenstein et al., 2024a). "d\_upper", "d\_mid" and "d\_lower" denote the upper, midpoint and lower boundary of a sampled soil horizon during calibration and target depth layer during prediction (Sect. 2.2, Table 5). Variable importance using impurity favors covariates with more distinct values and is biased against categorical covariates because these have a finite number of binary splits due to limited number of classes (Sandri and Zuccolotto, 2008, 2010).



## S2 Silt

### S2.1 Prediction maps

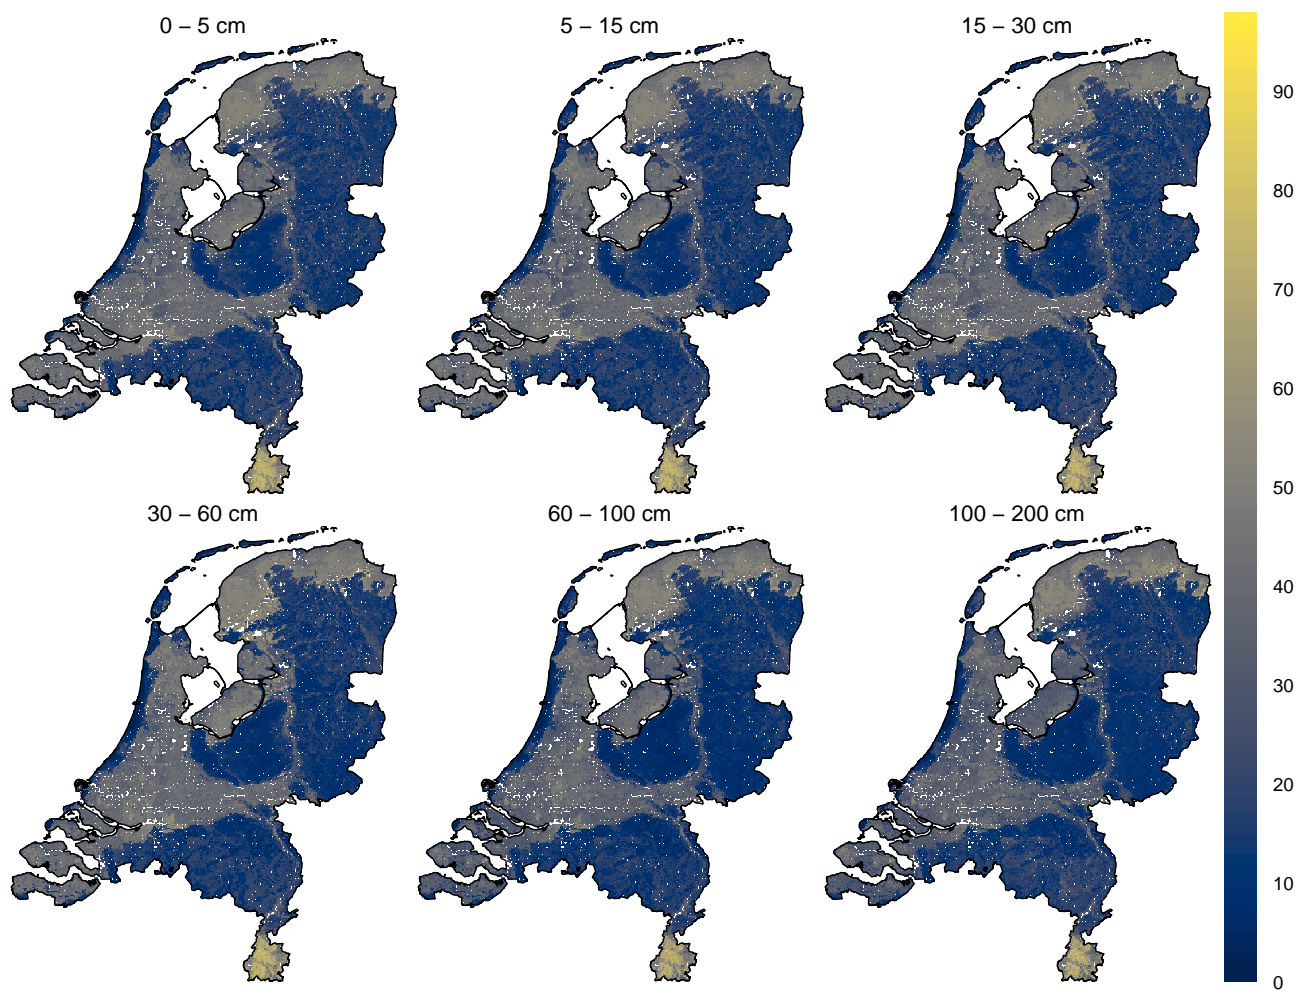

**Figure S12.** Predicted mean silt content [%] for every GSM depth layer.



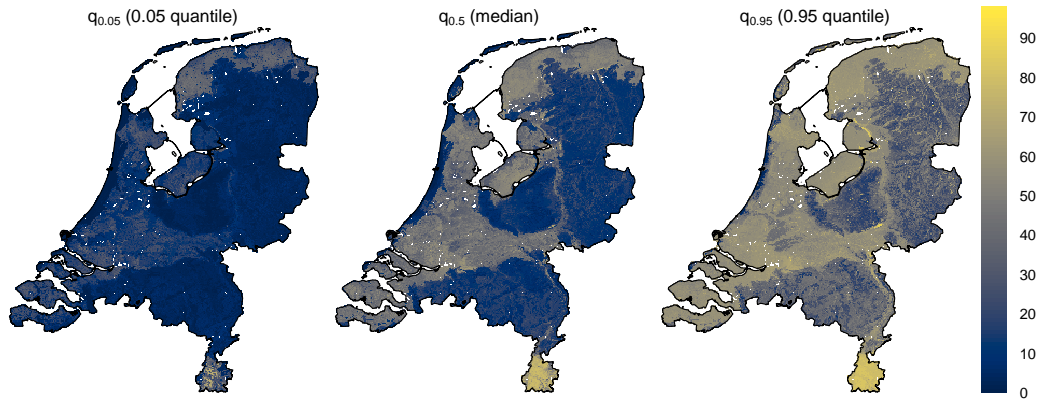

**Figure S13.** Predicted 5<sup>th</sup>, 50<sup>th</sup> (median) and 95<sup>th</sup> quantile for silt content [%] from 0–5 cm depth.

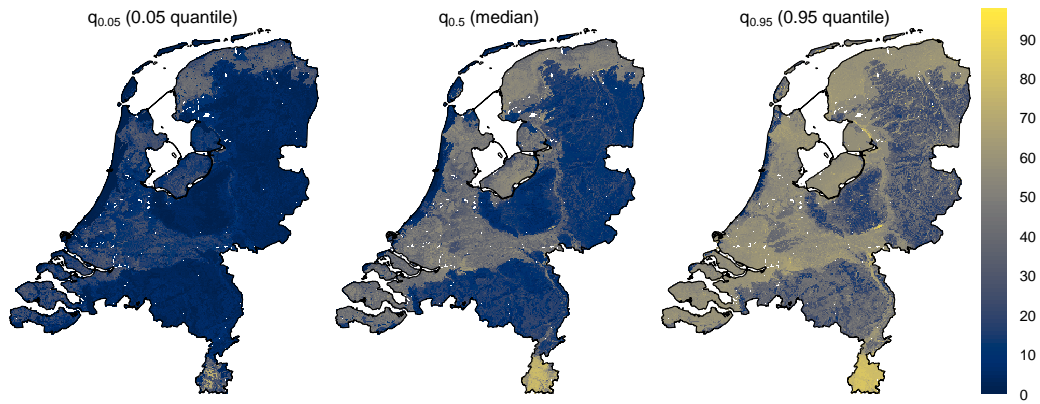

**Figure S14.** Predicted 5<sup>th</sup>, 50<sup>th</sup> (median) and 95<sup>th</sup> quantile for silt content [%] from 5–15 cm depth.

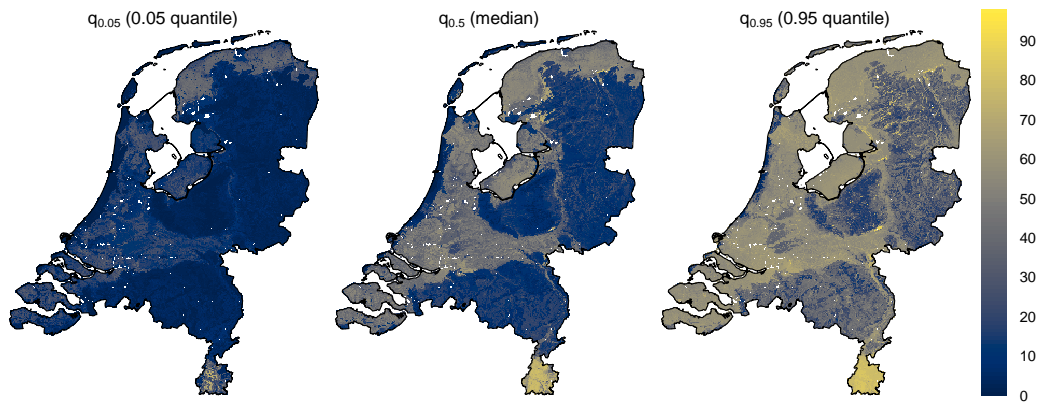

**Figure S15.** Predicted 5<sup>th</sup>, 50<sup>th</sup> (median) and 95<sup>th</sup> quantile for silt content [%] from 15–30 cm depth.

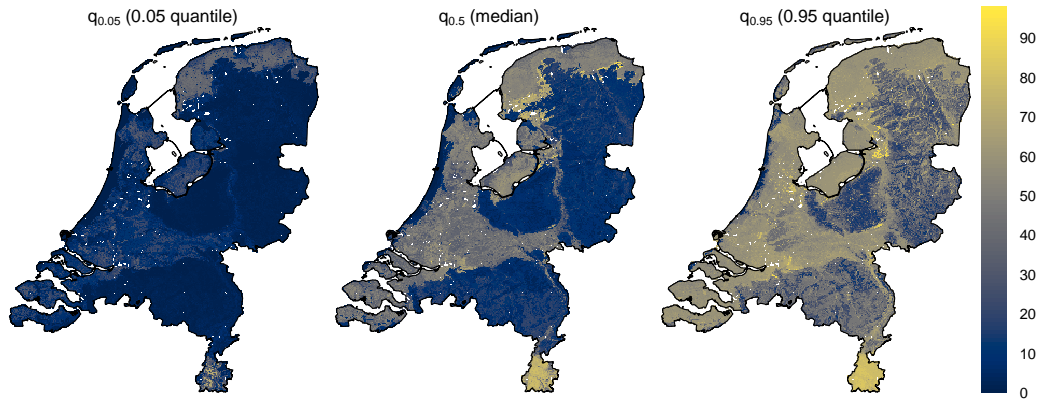

**Figure S16.** Predicted 5<sup>th</sup>, 50<sup>th</sup> (median) and 95<sup>th</sup> quantile for silt content [%] from 30–60 cm depth.

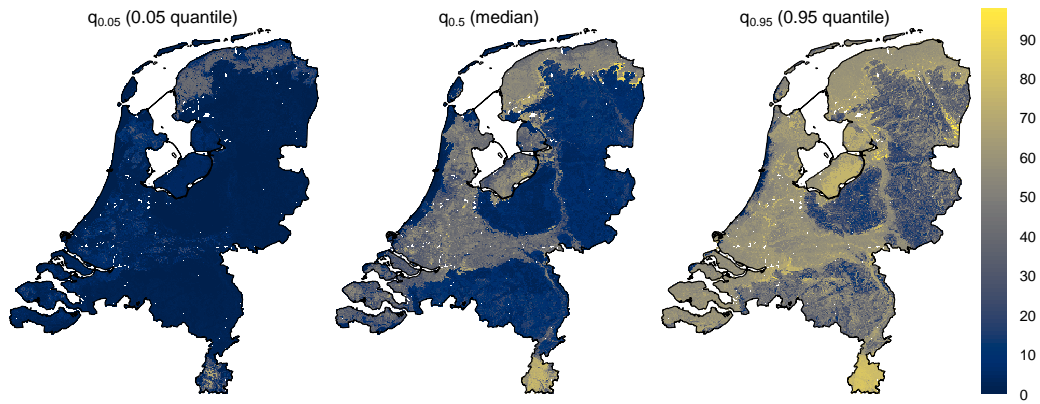

**Figure S17.** Predicted 5<sup>th</sup>, 50<sup>th</sup> (median) and 95<sup>th</sup> quantile for silt content [%] from 60–100 cm depth.

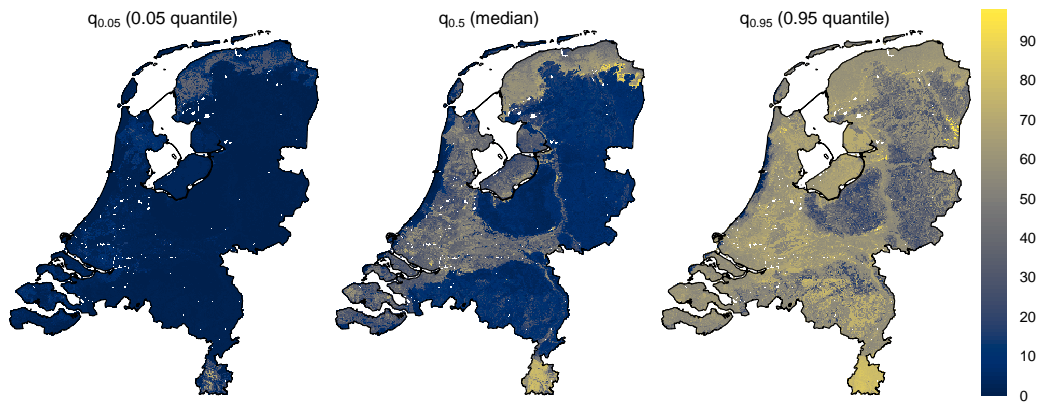

**Figure S18.** Predicted 5<sup>th</sup>, 50<sup>th</sup> (median) and 95<sup>th</sup> quantile for silt content [%] from 100–200 cm depth.

## S2.2 Accuracy assessment

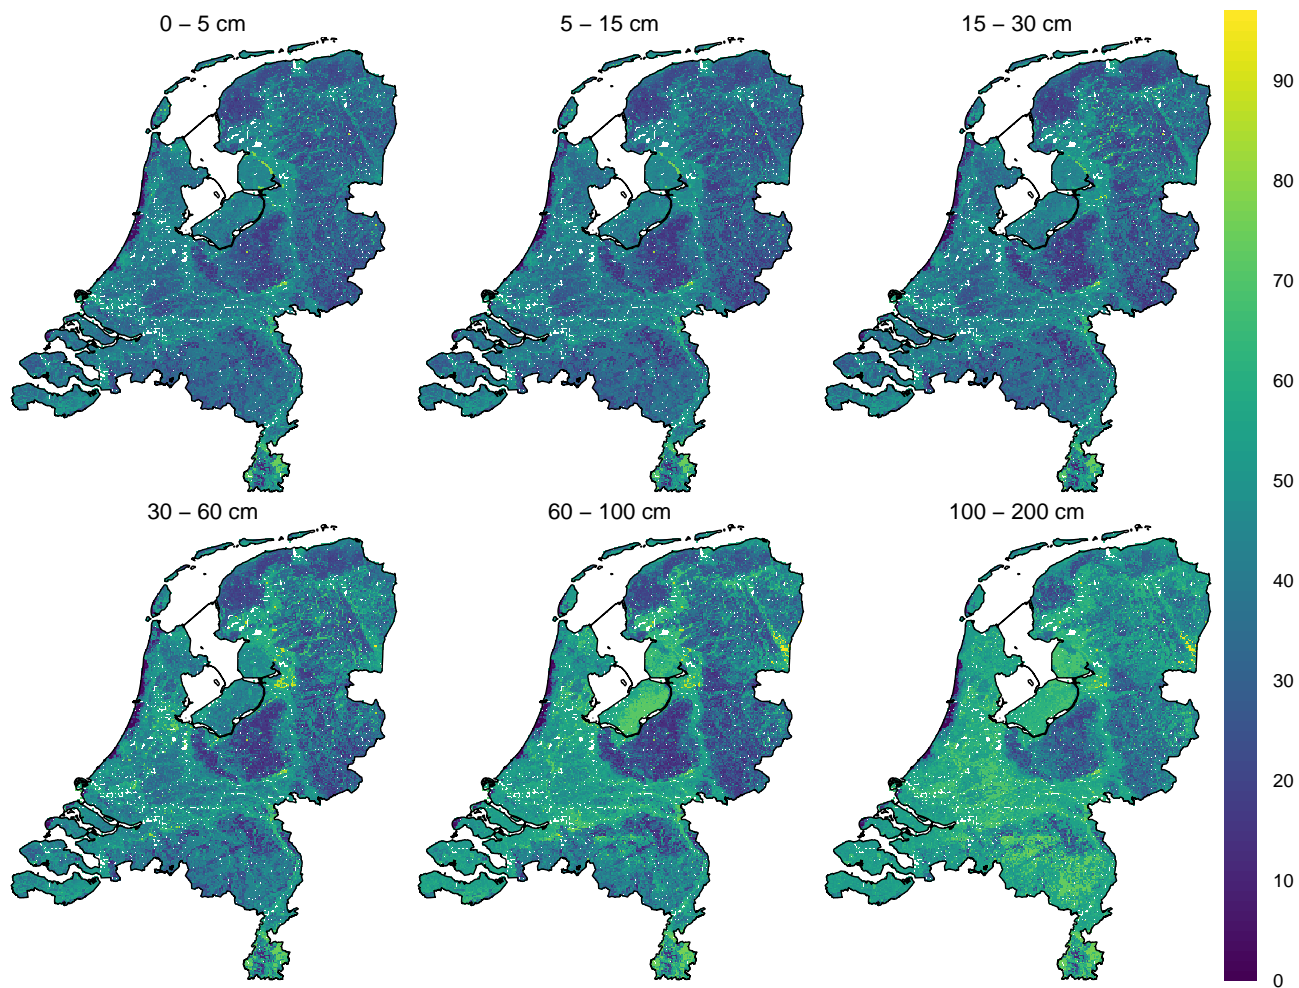

**Figure S19.** Maps of the PI90 as a measure of prediction uncertainty for silt content [%] for every GSM depth layer.

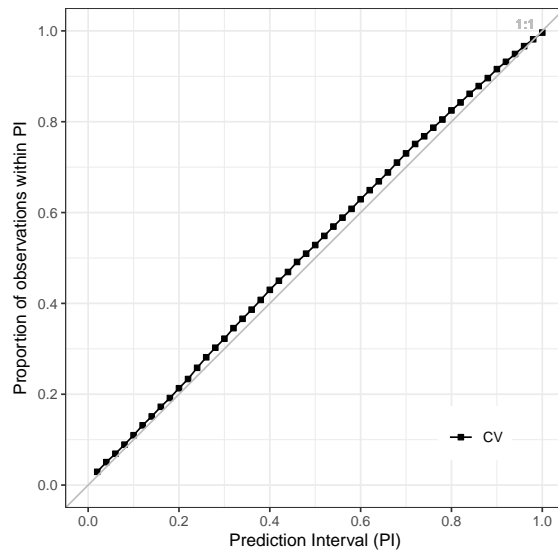

**Figure S20.** Prediction interval coverage probability (PICP) for prediction intervals between 0.02 and 1 of the PFB laboratory measurements used for 10-fold cross-validation (CV). The closer the points are to the 1:1 line, the more accurate the prediction uncertainty. Lines connecting the points do not represent actual data and are only for visual guidance.

**Table S2.** Model accuracy metrics of mean and median silt content [%] predictions using 10-fold cross-validation of PFB laboratory measurements (Sect. 2.6). Note that silt content was not measured in LSK or CCNL so design-based inference and computing 95 % confidence intervals (CI95) was not possible (Sect. 2.1.2). ME = mean error; RMSE = root mean squared error; MEC = model efficiency coefficient; PICP90 = prediction interval coverage probability of the PI90.

| Prediction | Depth (cm) | n    | ME           | CI95 of ME | RMSE         | CI95 of RMSE | MEC         | CI95 of MEC | PICP90      |
|------------|------------|------|--------------|------------|--------------|--------------|-------------|-------------|-------------|
| Mean       | 0 - 15     | 2986 | <b>-0.55</b> | -          | <b>10.17</b> | -            | <b>0.7</b>  | -           | <b>0.93</b> |
|            | 15 - 30    | 1794 | <b>0.05</b>  | -          | <b>10.64</b> | -            | <b>0.68</b> | -           | <b>0.92</b> |
|            | 30 - 60    | 3626 | <b>-0.39</b> | -          | <b>12.6</b>  | -            | <b>0.62</b> | -           | <b>0.91</b> |
|            | 60 - 100   | 3241 | <b>-0.38</b> | -          | <b>13.84</b> | -            | <b>0.54</b> | -           | <b>0.91</b> |
|            | 100 - 200  | 1244 | <b>0.52</b>  | -          | <b>15.21</b> | -            | <b>0.51</b> | -           | <b>0.9</b>  |
| Median     | 0 - 15     | 2986 | <b>-0.13</b> | -          | <b>10.61</b> | -            | <b>0.67</b> | -           | <b>0.93</b> |
|            | 15 - 30    | 1794 | <b>0.67</b>  | -          | <b>11.02</b> | -            | <b>0.66</b> | -           | <b>0.92</b> |
|            | 30 - 60    | 3626 | <b>0.21</b>  | -          | <b>13.46</b> | -            | <b>0.57</b> | -           | <b>0.91</b> |
|            | 60 - 100   | 3241 | <b>0.83</b>  | -          | <b>14.75</b> | -            | <b>0.48</b> | -           | <b>0.91</b> |
|            | 100 - 200  | 1244 | <b>2.71</b>  | -          | <b>16.21</b> | -            | <b>0.44</b> | -           | <b>0.9</b>  |

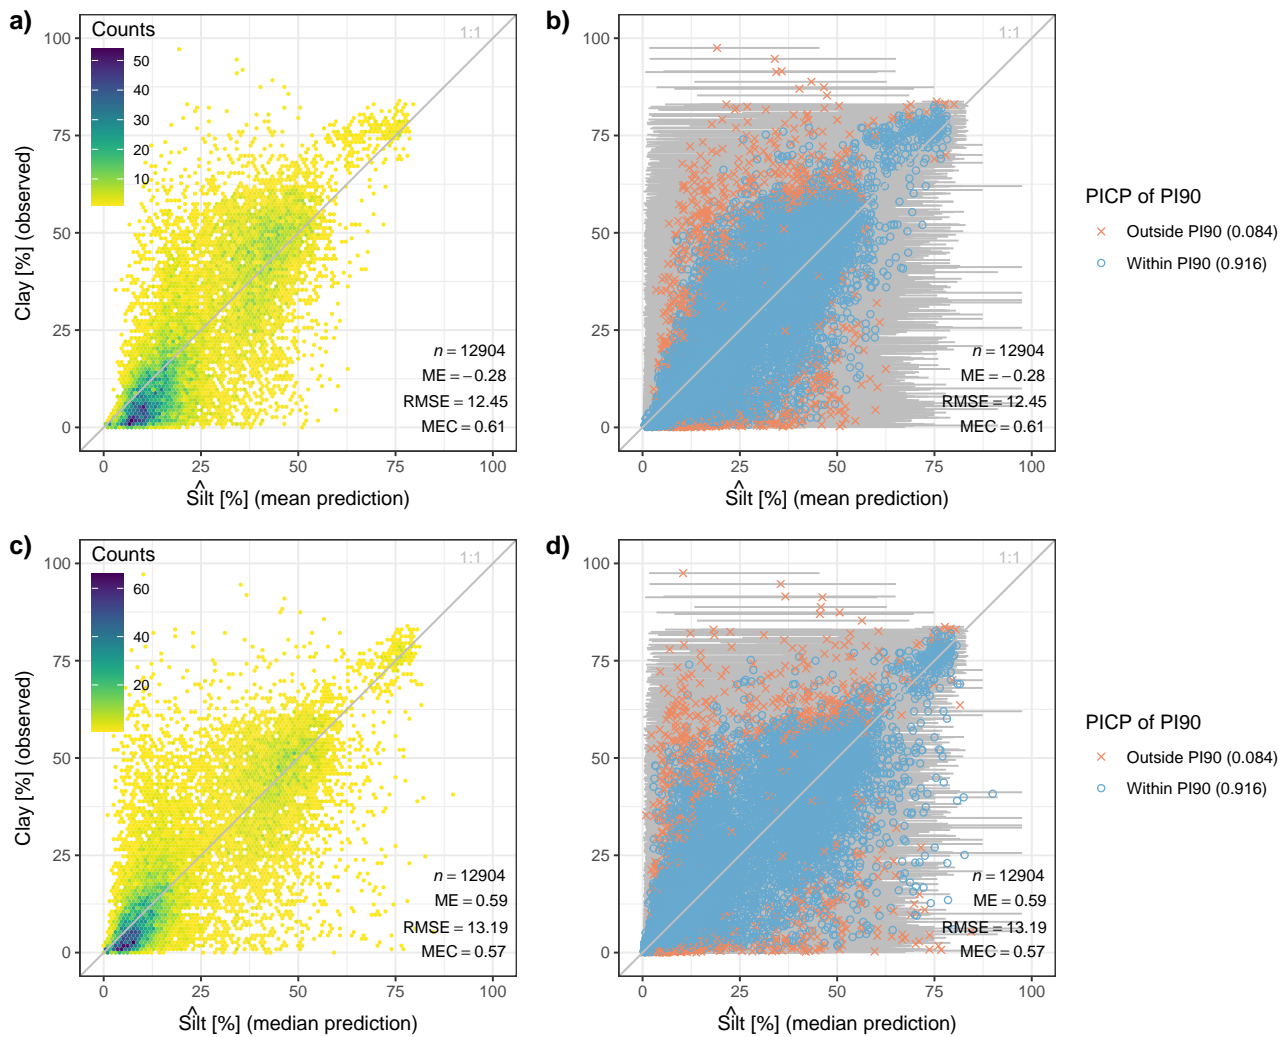

**Figure S21.** Predicted mean (a & b) and median (c & d) silt content [%] on the x-axis vs. measured silt content [%] on the y-axis. Accuracy plots and metrics (ME, RMSE and MEC) were computed using 10-fold cross-validation of PFB laboratory measurements (Sect. 2.6). Plots a & c emphasize point density whereas plots b & d visualize prediction uncertainty (PI90 as error bars) and the PICP90 in the figure legends.

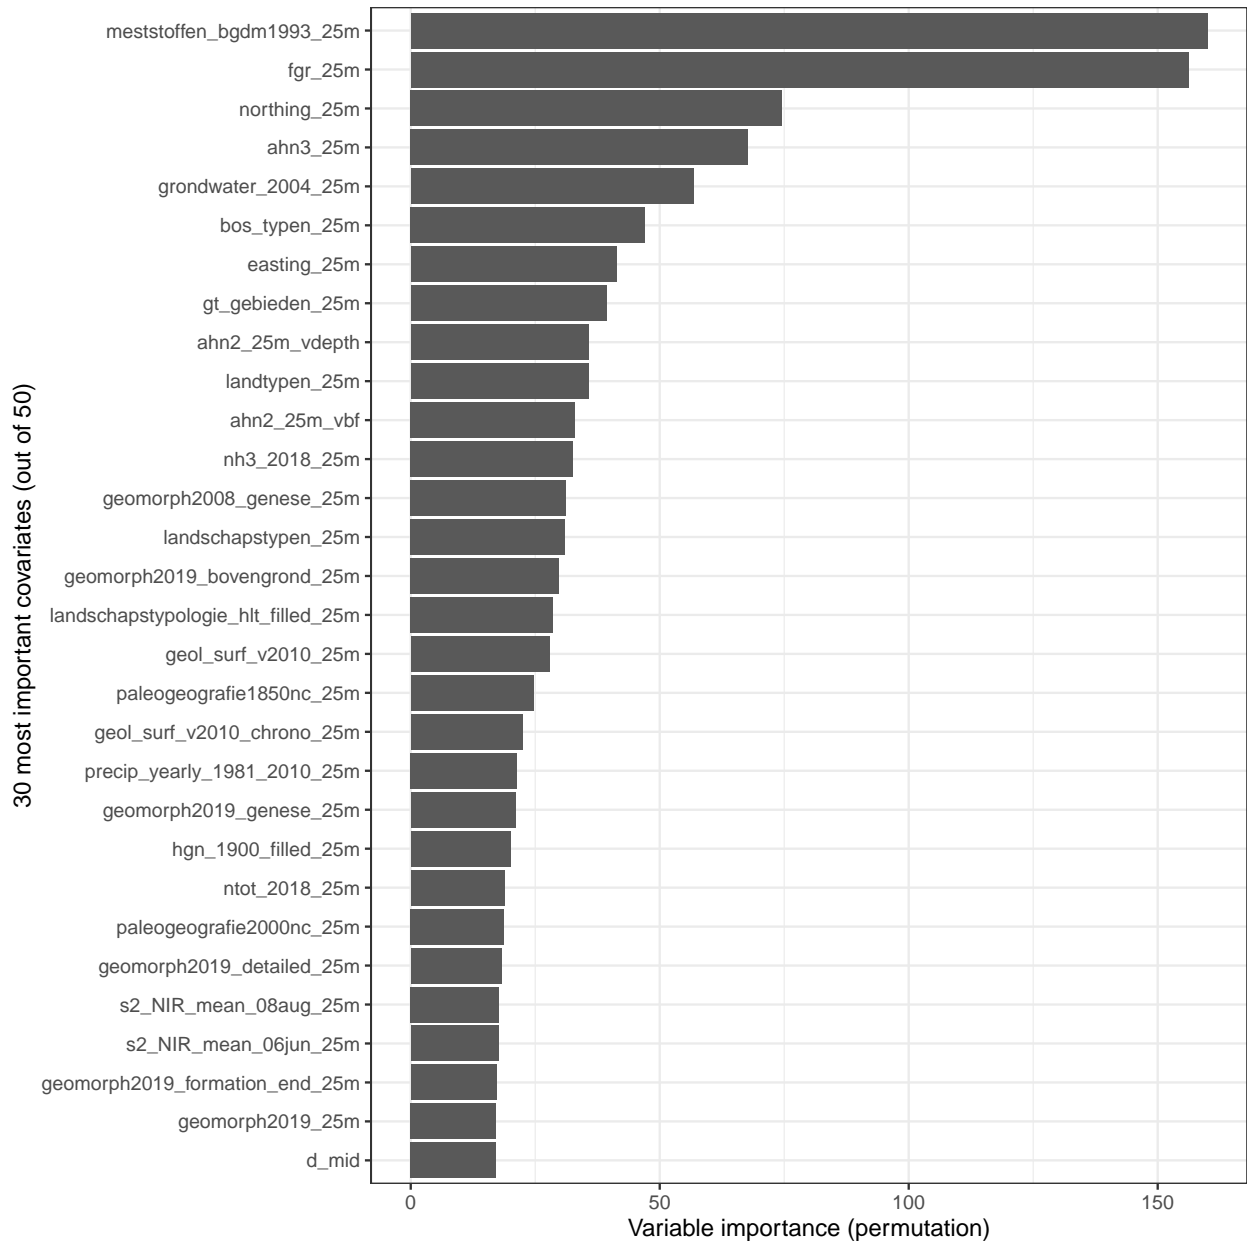

**Figure S22.** Variable importance for predicting silt content, assessed using the permutation method (Breiman, 2002) (Sect. 2.4). A description of the covariate names (y-axis) can be found in the model code (<https://git.wur.nl/helfe001/bis-4d>) and covariate dataset (Helfenstein et al., 2024a). "d\_upper", "d\_mid" and "d\_lower" denote the upper, midpoint and lower boundary of a sampled soil horizon during calibration and target depth layer during prediction (Sect. 2.2, Table 5).



### S3 Sand

#### S3.1 Prediction maps

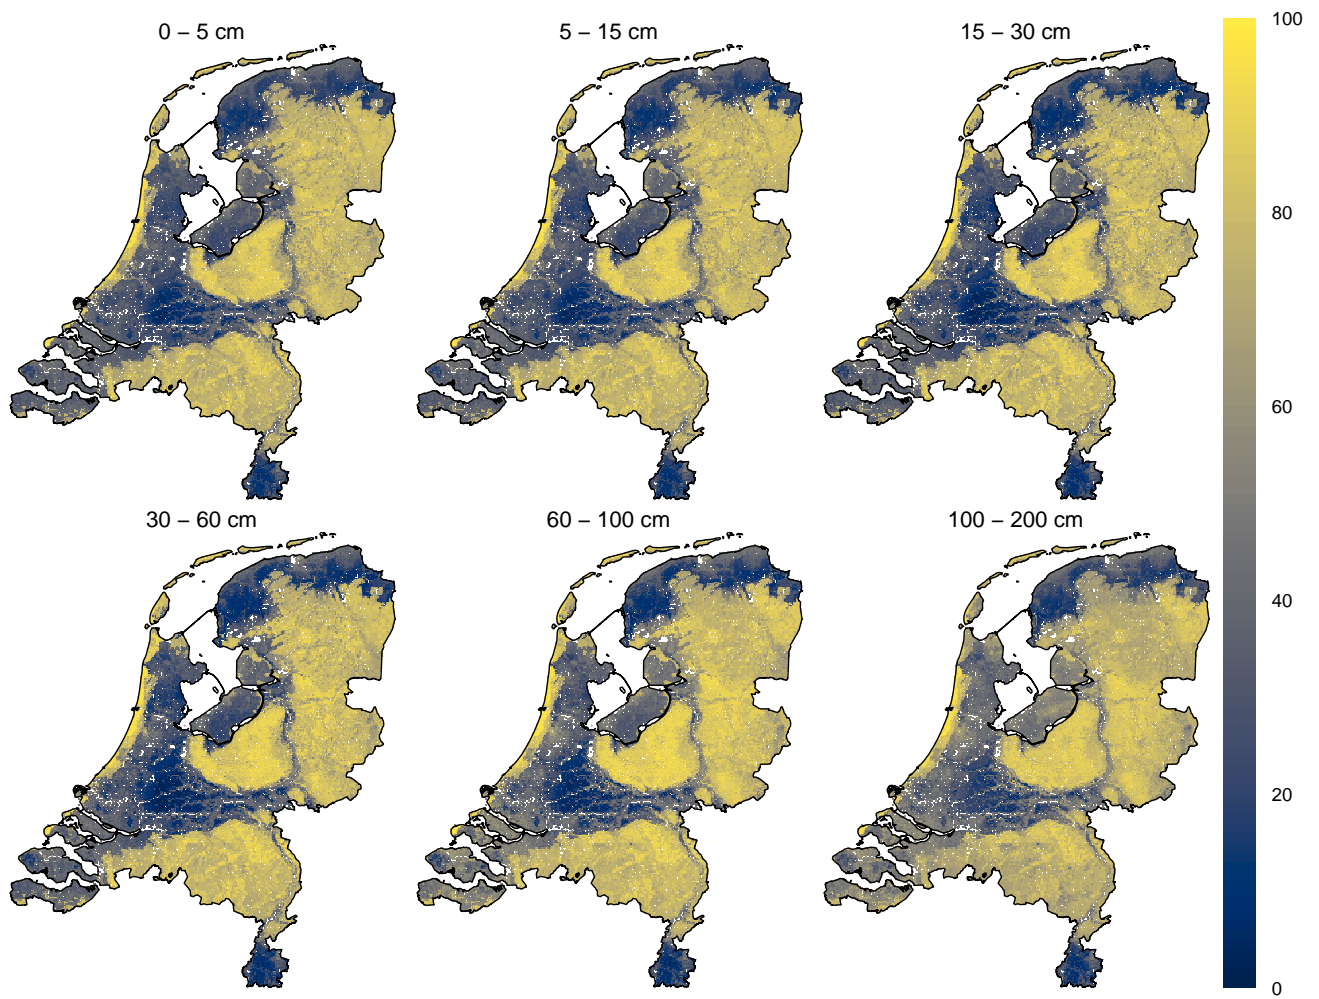

**Figure S23.** Predicted mean sand content [%] for every GSM depth layer.

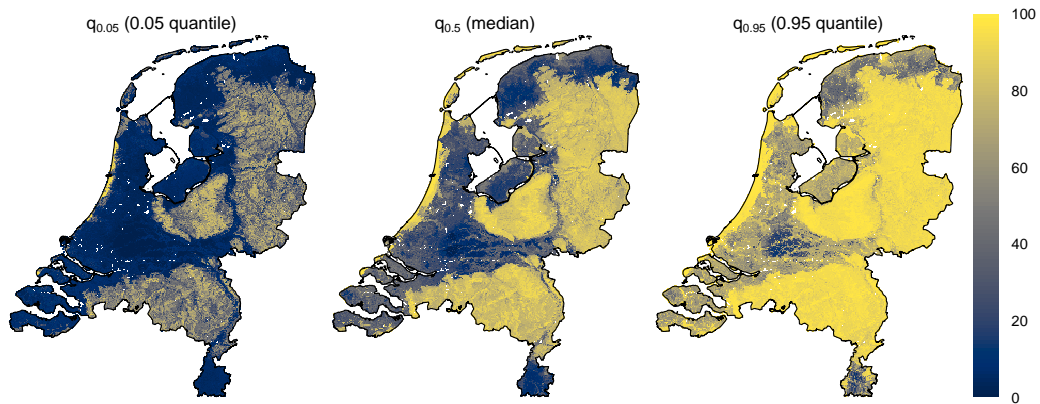

**Figure S24.** Predicted 5<sup>th</sup>, 50<sup>th</sup> (median) and 95<sup>th</sup> quantile for sand content [%] from 0–5 cm depth.

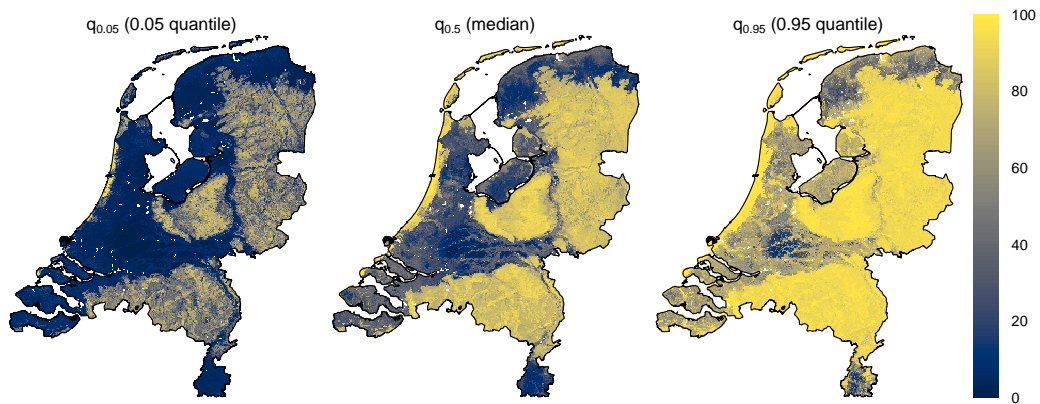

**Figure S25.** Predicted 5<sup>th</sup>, 50<sup>th</sup> (median) and 95<sup>th</sup> quantile for sand content [%] from 5–15 cm depth.

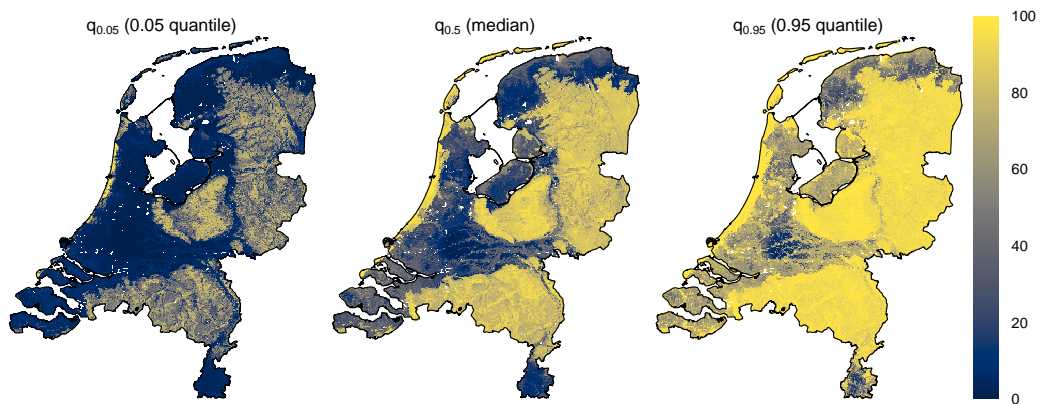

**Figure S26.** Predicted 5<sup>th</sup>, 50<sup>th</sup> (median) and 95<sup>th</sup> quantile for sand content [%] from 15–30 cm depth.



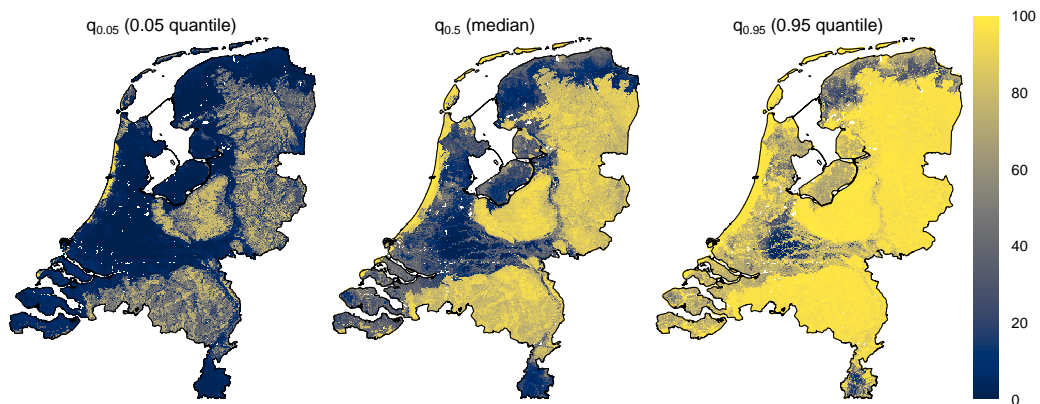

**Figure S27.** Predicted 5<sup>th</sup>, 50<sup>th</sup> (median) and 95<sup>th</sup> quantile for sand content [%] from 30–60 cm depth.

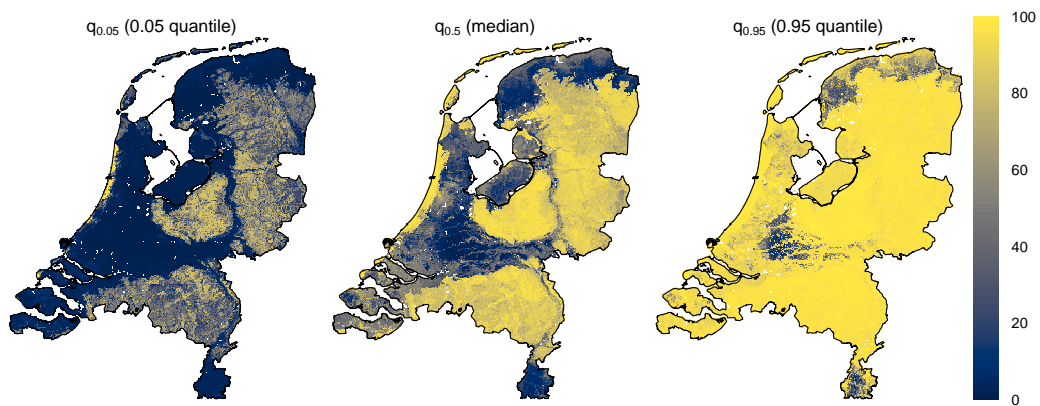

**Figure S28.** Predicted 5<sup>th</sup>, 50<sup>th</sup> (median) and 95<sup>th</sup> quantile for sand content [%] from 60–100 cm depth.

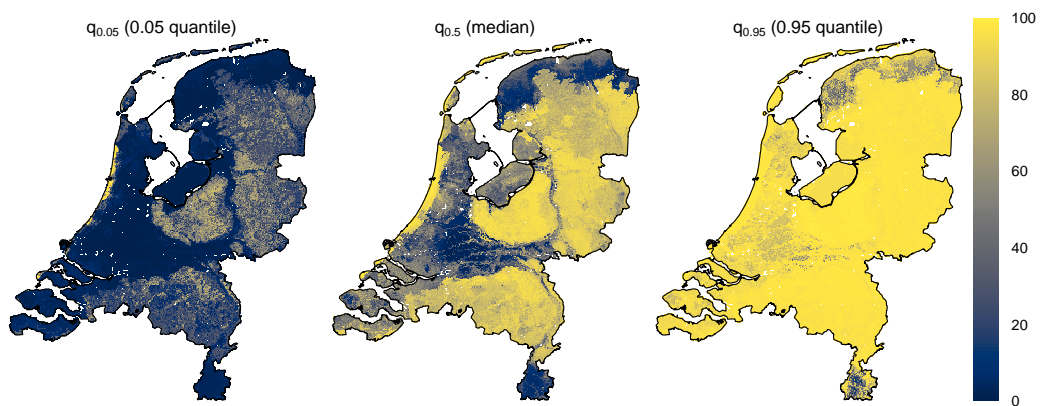

**Figure S29.** Predicted 5<sup>th</sup>, 50<sup>th</sup> (median) and 95<sup>th</sup> quantile for sand content [%] from 100–200 cm depth.

### S3.2 Accuracy assessment

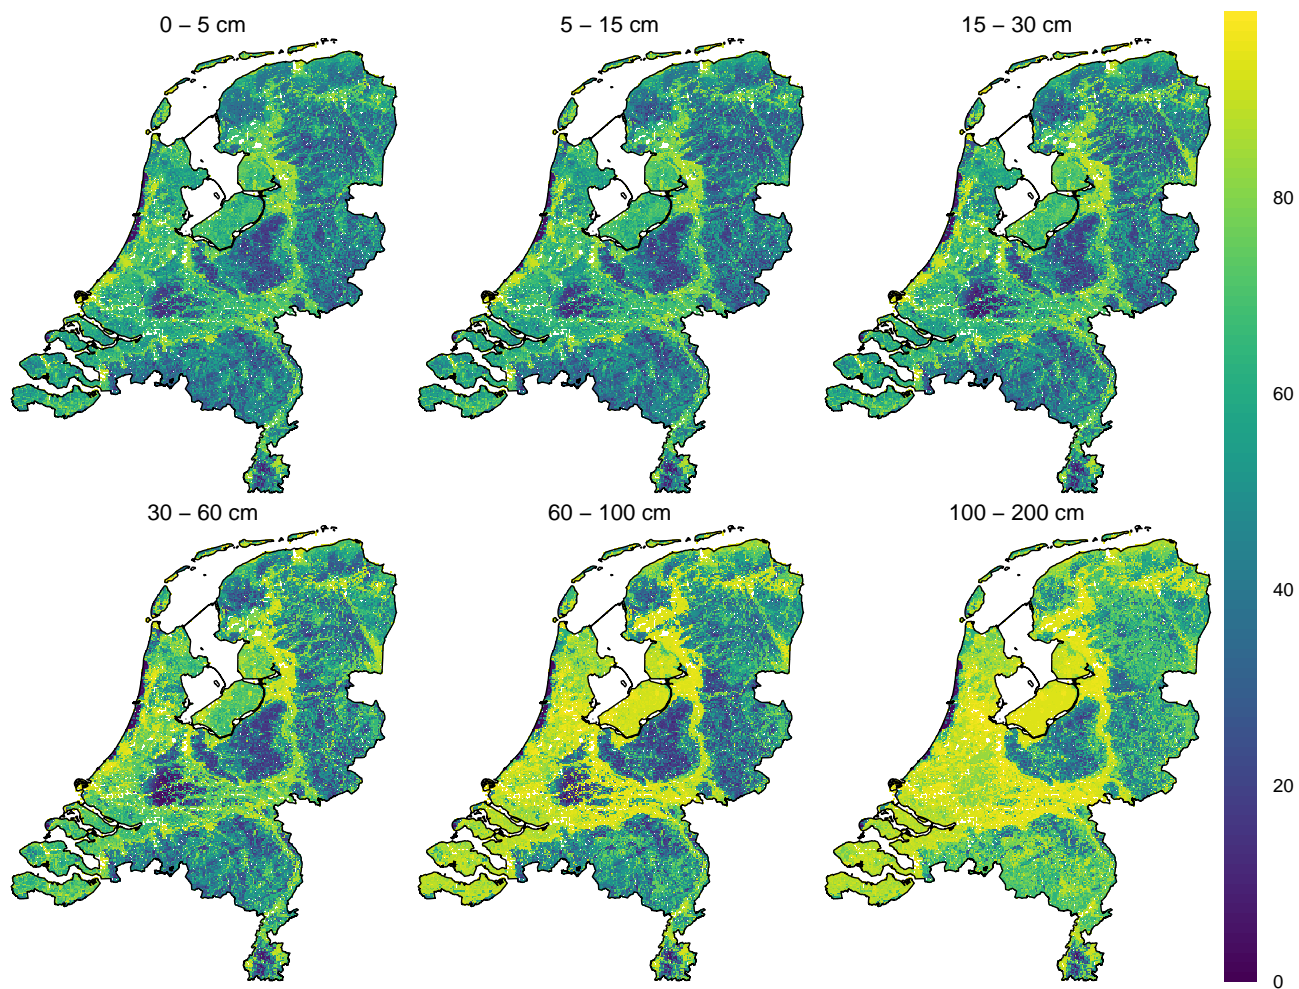

**Figure S30.** Maps of the PI90 as a measure of prediction uncertainty for sand content [%] for every GSM depth layer.

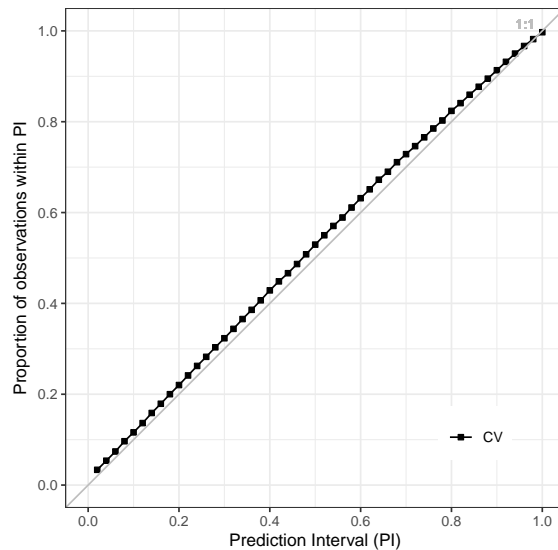

**Figure S31.** Prediction interval coverage probability (PICP) for prediction intervals between 0.02 and 1 of the PFB laboratory measurements used for 10-fold cross-validation (CV). The closer the points are to the 1:1 line, the more accurate the prediction uncertainty. Lines connecting the points do not represent actual data and are only for visual guidance.

**Table S3.** Model accuracy metrics of mean and median sand content [%] predictions using 10-fold cross-validation of PFB laboratory measurements (Sect. 2.6). Note that sand content was not measured in LSK or CCNL so design-based inference and computing 95% confidence intervals (CI95) was not possible (Sect. 2.1.2). ME = mean error; RMSE = root mean squared error; MEC = model efficiency coefficient; PICP90 = prediction interval coverage probability of the PI90.

| Prediction | Depth (cm) | n    | ME           | CI95 of ME | RMSE         | CI95 of RMSE | MEC         | CI95 of MEC | PICP90      |
|------------|------------|------|--------------|------------|--------------|--------------|-------------|-------------|-------------|
| Mean       | 0 - 15     | 2986 | <b>-0.35</b> | -          | <b>13.66</b> | -            | <b>0.8</b>  | -           | <b>0.93</b> |
|            | 15 - 30    | 1794 | <b>-1.17</b> | -          | <b>14.31</b> | -            | <b>0.81</b> | -           | <b>0.91</b> |
|            | 30 - 60    | 3626 | <b>0.26</b>  | -          | <b>17.19</b> | -            | <b>0.75</b> | -           | <b>0.91</b> |
|            | 60 - 100   | 3241 | <b>1.61</b>  | -          | <b>18.99</b> | -            | <b>0.67</b> | -           | <b>0.91</b> |
|            | 100 - 200  | 1244 | <b>1.16</b>  | -          | <b>20.75</b> | -            | <b>0.61</b> | -           | <b>0.9</b>  |
| Median     | 0 - 15     | 2986 | <b>-1.23</b> | -          | <b>13.82</b> | -            | <b>0.79</b> | -           | <b>0.93</b> |
|            | 15 - 30    | 1794 | <b>-2.13</b> | -          | <b>14.23</b> | -            | <b>0.81</b> | -           | <b>0.91</b> |
|            | 30 - 60    | 3626 | <b>-0.95</b> | -          | <b>17.05</b> | -            | <b>0.75</b> | -           | <b>0.91</b> |
|            | 60 - 100   | 3241 | <b>-0.42</b> | -          | <b>18.97</b> | -            | <b>0.67</b> | -           | <b>0.91</b> |
|            | 100 - 200  | 1244 | <b>-2.21</b> | -          | <b>20.57</b> | -            | <b>0.61</b> | -           | <b>0.9</b>  |

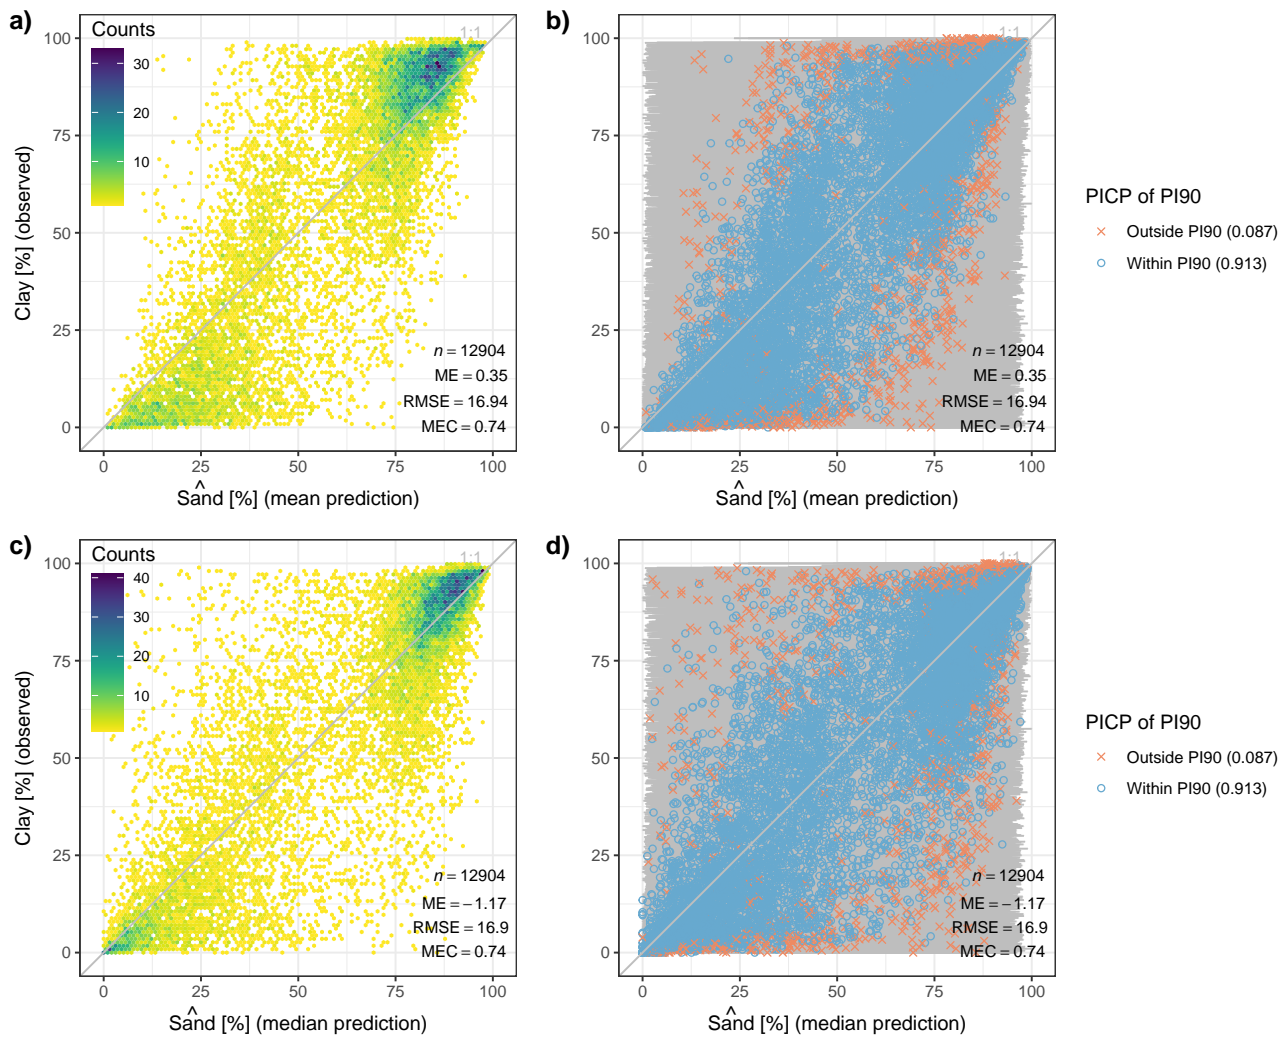

**Figure S32.** Predicted mean (a & b) and median (c & d) sand content [%] on the x-axis vs. measured sand content [%] on the y-axis. Accuracy plots and metrics (ME, RMSE and MEC) were computed using 10-fold cross-validation of PFB laboratory measurements (Sect. 2.6). Plots a & c emphasize point density whereas plots b & d visualize prediction uncertainty (PI90 as error bars) and the PICP90 in the figure legends.

### S3.3 Variable importance

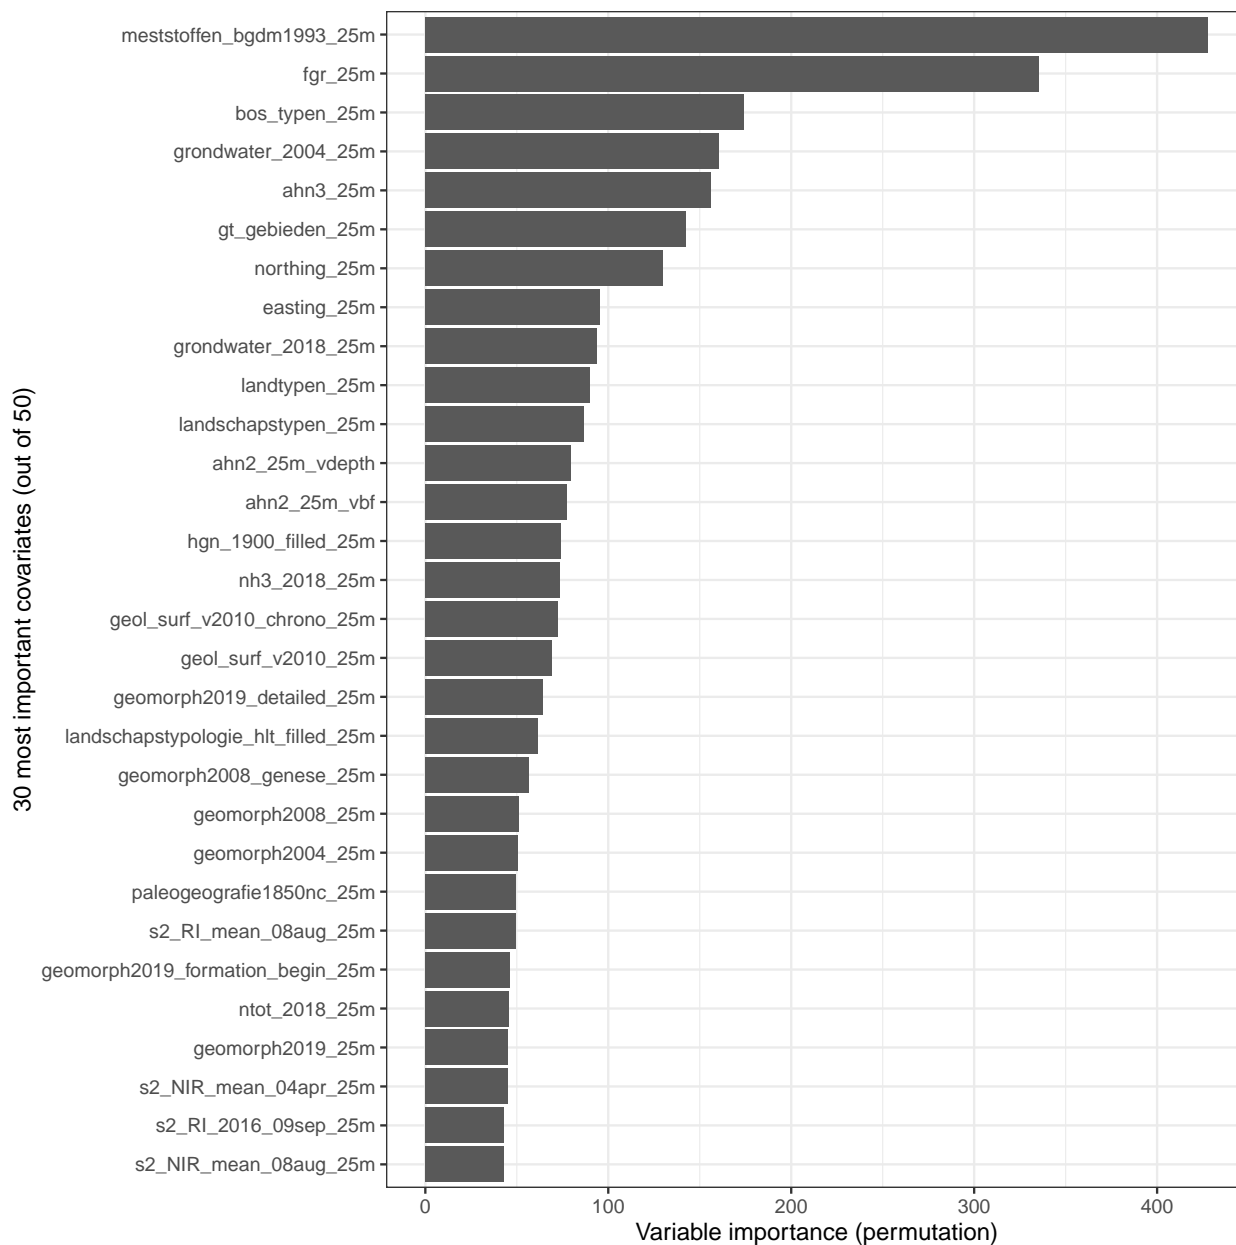

**Figure S33.** Variable importance for predicting sand content, assessed using the permutation method (Breiman, 2002) (Sect. 2.4). A description of the covariate names (y-axis) can be found in the model code (<https://git.wur.nl/helfe001/bis-4d>) and covariate dataset (Helfenstein et al., 2024a). "d\_upper", "d\_mid" and "d\_lower" denote the upper, midpoint and lower boundary of a sampled soil horizon during calibration and target depth layer during prediction (Sect. 2.2, Table 5).

S4.1 Prediction maps

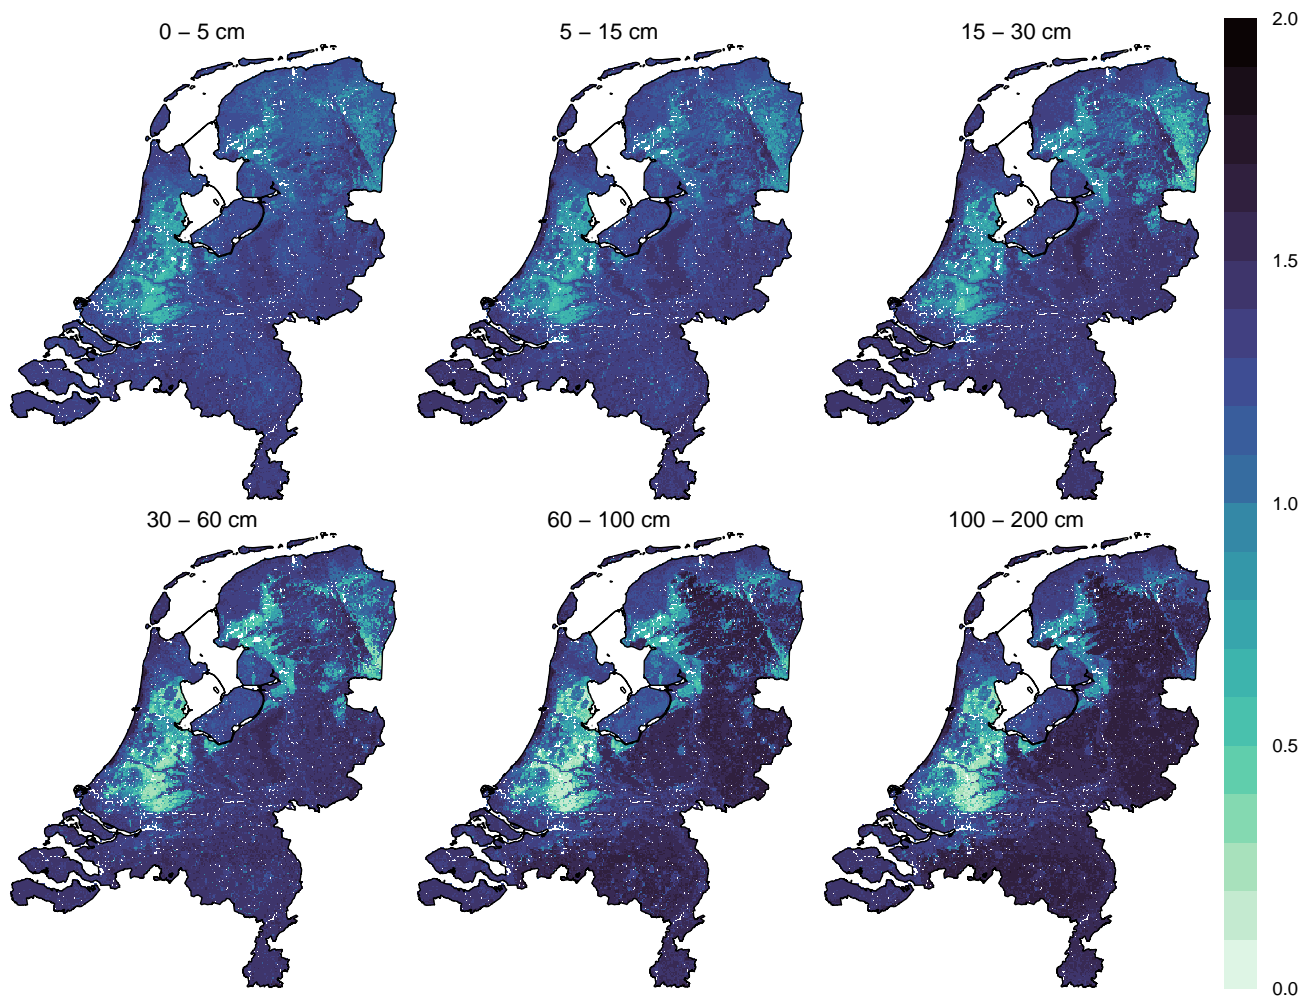

Figure S34. Predicted mean BD [ $\text{g cm}^{-3}$ ] for every GSM depth layer.



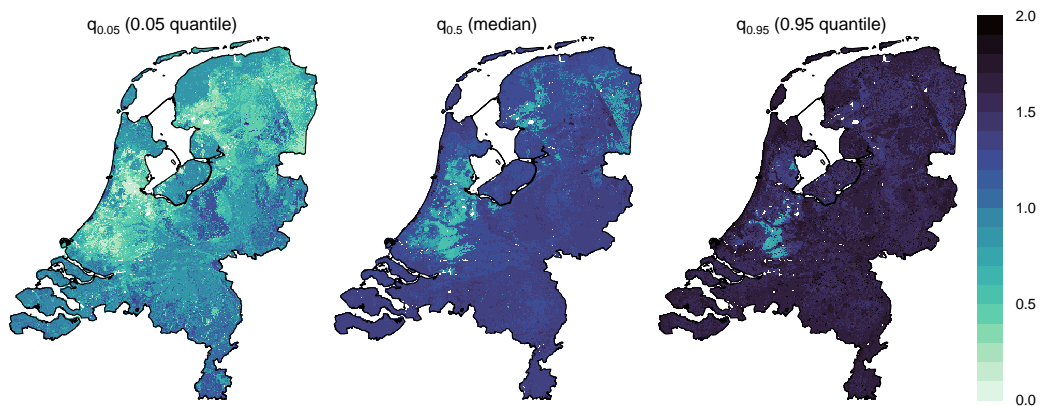

**Figure S35.** Predicted 5<sup>th</sup>, 50<sup>th</sup> (median) and 95<sup>th</sup> quantile for BD [ $\text{g cm}^{-3}$ ] from 0–5 cm depth.

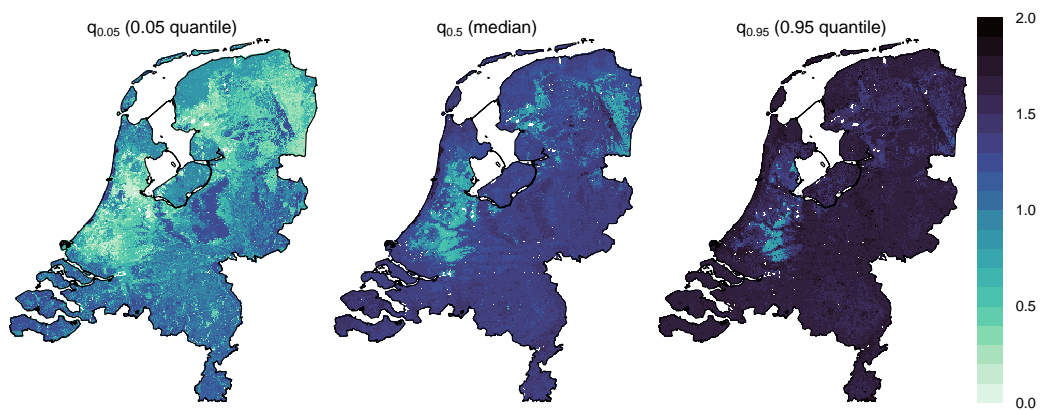

**Figure S36.** Predicted 5<sup>th</sup>, 50<sup>th</sup> (median) and 95<sup>th</sup> quantile for BD [ $\text{g cm}^{-3}$ ] from 5–15 cm depth.

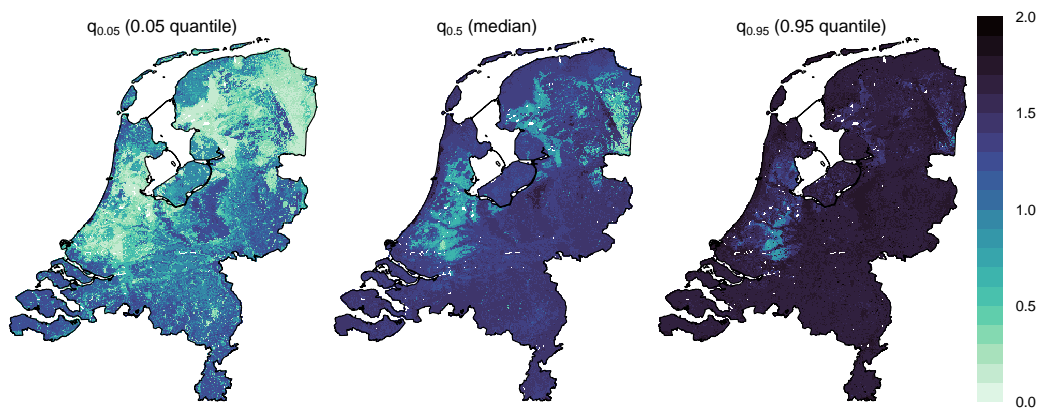

**Figure S37.** Predicted 5<sup>th</sup>, 50<sup>th</sup> (median) and 95<sup>th</sup> quantile for BD [ $\text{g cm}^{-3}$ ] from 15–30 cm depth.

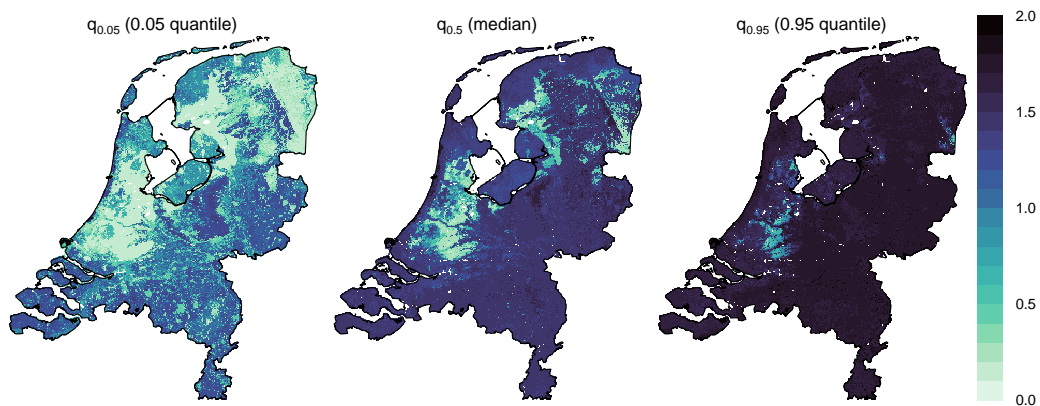

**Figure S38.** Predicted 5<sup>th</sup>, 50<sup>th</sup> (median) and 95<sup>th</sup> quantile for BD [ $\text{g cm}^{-3}$ ] from 30–60 cm depth.

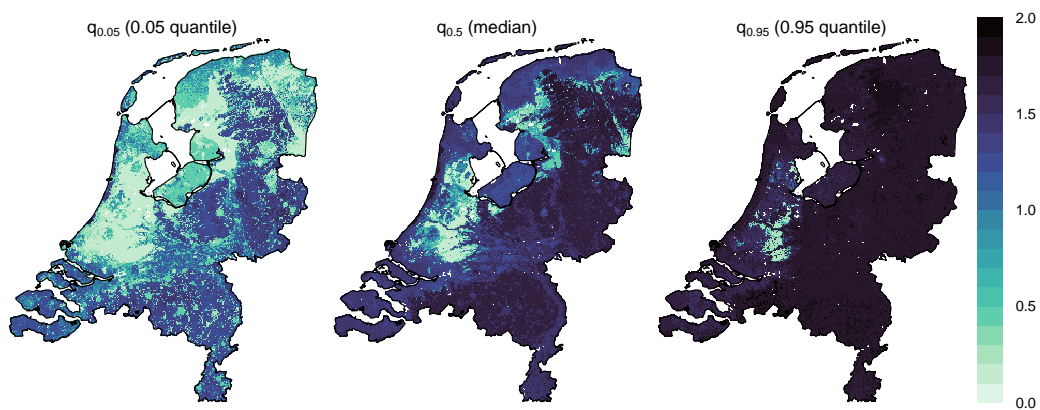

**Figure S39.** Predicted 5<sup>th</sup>, 50<sup>th</sup> (median) and 95<sup>th</sup> quantile for BD [ $\text{g cm}^{-3}$ ] from 60–100 cm depth.

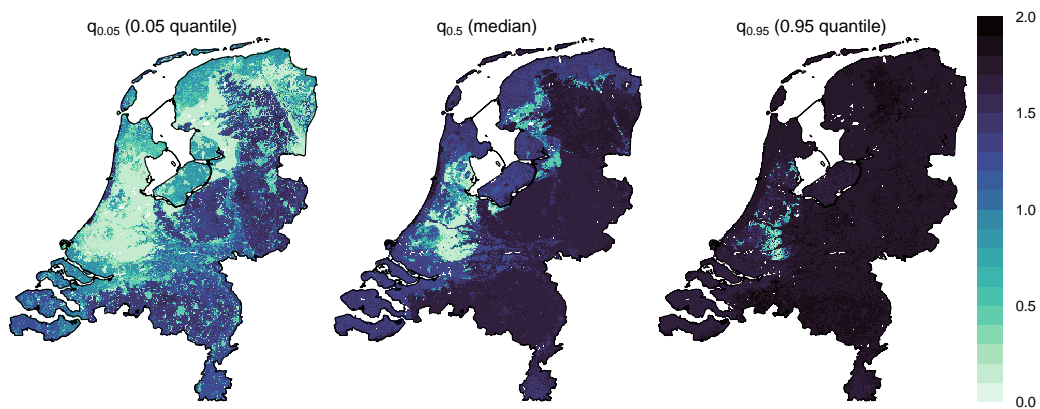

**Figure S40.** Predicted 5<sup>th</sup>, 50<sup>th</sup> (median) and 95<sup>th</sup> quantile for BD [ $\text{g cm}^{-3}$ ] from 100–200 cm depth.



## S4.2 Accuracy assessment

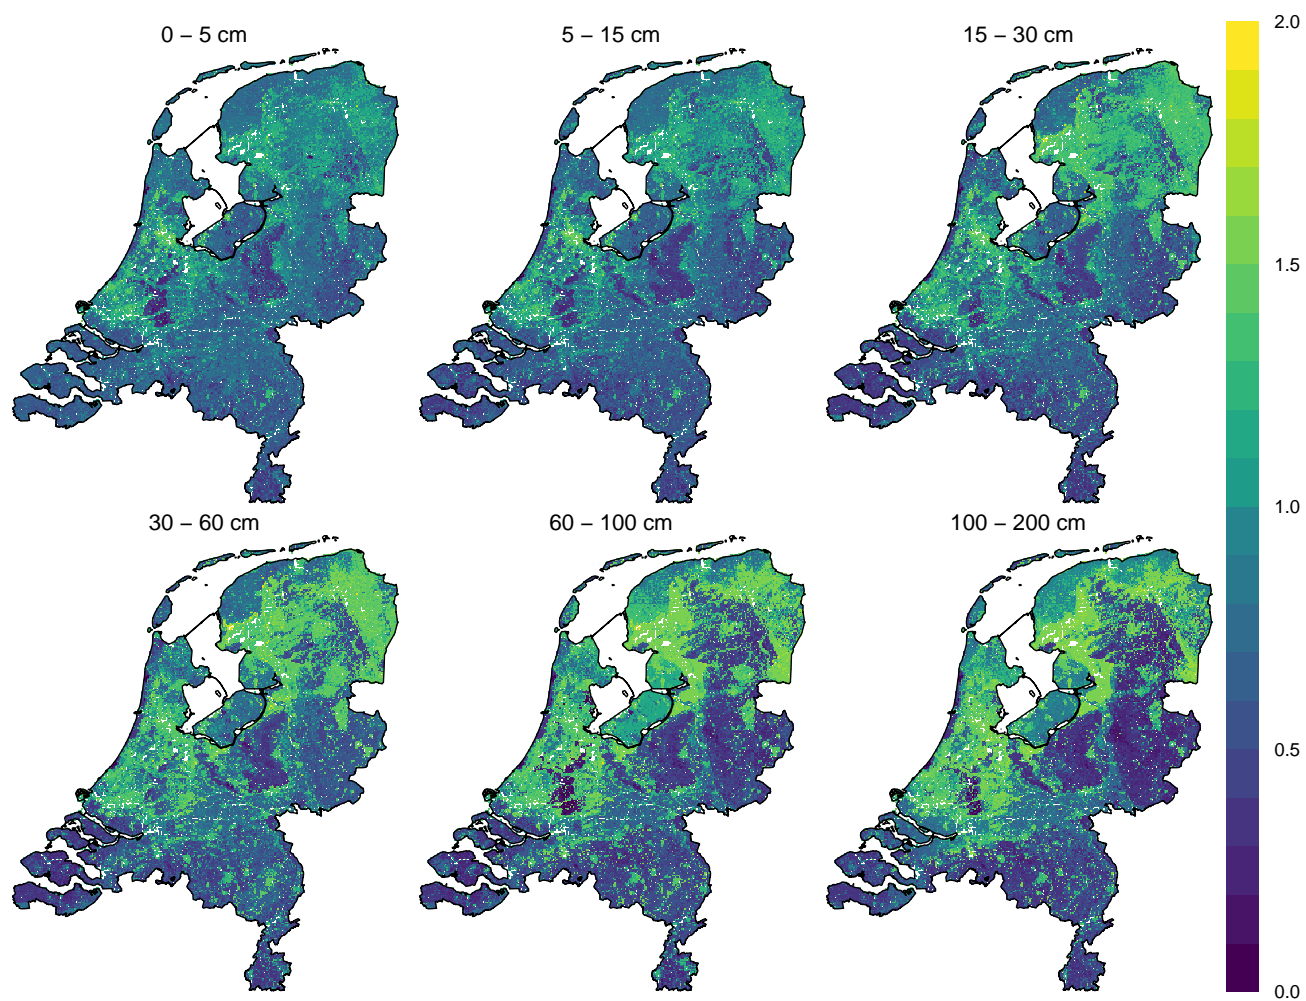

**Figure S41.** Maps of the PI90 as a measure of prediction uncertainty for BD [ $\text{g cm}^{-3}$ ] for every GSM depth layer.

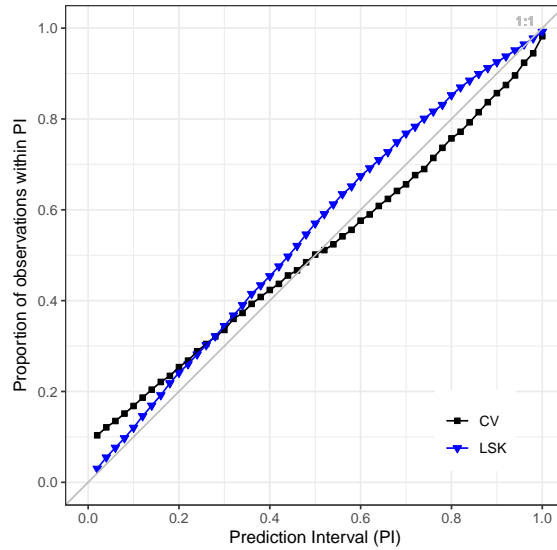

**Figure S42.** Prediction interval coverage probability (PICP) for prediction intervals between 0.02 and 1 of data used for different statistical validation strategies: 10-fold cross-validation of PFB laboratory measurements (CV) and LSK laboratory measurements (Sect. 2.6). The closer the points are to the 1:1 line, the more accurate the prediction uncertainty. Lines connecting the points do not represent actual data and are only for visual guidance.

**Table S4.** Model accuracy metrics of mean and median BD [ $\text{g cm}^{-3}$ ] predictions using design-based inference of LSK laboratory measurements (Sect. 2.6). ME = mean error; RMSE = root mean squared error; MEC = model efficiency coefficient; PICP90 = prediction interval coverage probability of the PI90. The lower and upper 97.5 % confidence limits of the accuracy metrics were computed using design-based inference according to de Gruijter et al. (2006) and Sect. 2.6.2 of Helfenstein et al. (2022). Together, the lower and upper 97.5 % confidence limits give the 95 % confidence interval (CI95).

| Prediction | Depth (cm) | n    | ME           | CI95 of ME   | RMSE        | CI95 of RMSE | MEC         | CI95 of MEC | PICP90      |
|------------|------------|------|--------------|--------------|-------------|--------------|-------------|-------------|-------------|
| Mean       | 0 - 15     | 1250 | <b>0</b>     | -0.01, 0.01  | <b>0.21</b> | 0.2, 0.22    | <b>0.39</b> | 0.34, 0.45  | <b>0.94</b> |
|            | 15 - 30    | 245  | <b>0.04</b>  | 0, 0.07      | <b>0.24</b> | 0.19, 0.28   | <b>0.78</b> | 0.74, 0.82  | <b>0.91</b> |
|            | 30 - 60    | 1321 | <b>0.02</b>  | 0, 0.03      | <b>0.28</b> | 0.26, 0.29   | <b>0.54</b> | 0.49, 0.59  | <b>0.95</b> |
|            | 60 - 100   | 1244 | <b>0.01</b>  | -0.01, 0.02  | <b>0.31</b> | 0.29, 0.33   | <b>0.49</b> | 0.43, 0.55  | <b>0.92</b> |
|            | 100 - 200  | 843  | <b>-0.03</b> | -0.05, 0     | <b>0.36</b> | 0.33, 0.38   | <b>0.47</b> | 0.41, 0.54  | <b>0.88</b> |
| Median     | 0 - 15     | 1250 | <b>-0.03</b> | -0.05, -0.02 | <b>0.22</b> | 0.2, 0.23    | <b>0.34</b> | 0.27, 0.41  | <b>0.94</b> |
|            | 15 - 30    | 245  | <b>-0.01</b> | -0.04, 0.03  | <b>0.24</b> | 0.17, 0.29   | <b>0.78</b> | 0.72, 0.83  | <b>0.91</b> |
|            | 30 - 60    | 1321 | <b>-0.01</b> | -0.03, 0     | <b>0.28</b> | 0.26, 0.29   | <b>0.54</b> | 0.48, 0.61  | <b>0.95</b> |
|            | 60 - 100   | 1244 | <b>-0.03</b> | -0.05, -0.01 | <b>0.32</b> | 0.3, 0.35    | <b>0.44</b> | 0.37, 0.53  | <b>0.92</b> |
|            | 100 - 200  | 843  | <b>-0.06</b> | -0.09, -0.04 | <b>0.38</b> | 0.34, 0.41   | <b>0.41</b> | 0.32, 0.51  | <b>0.88</b> |

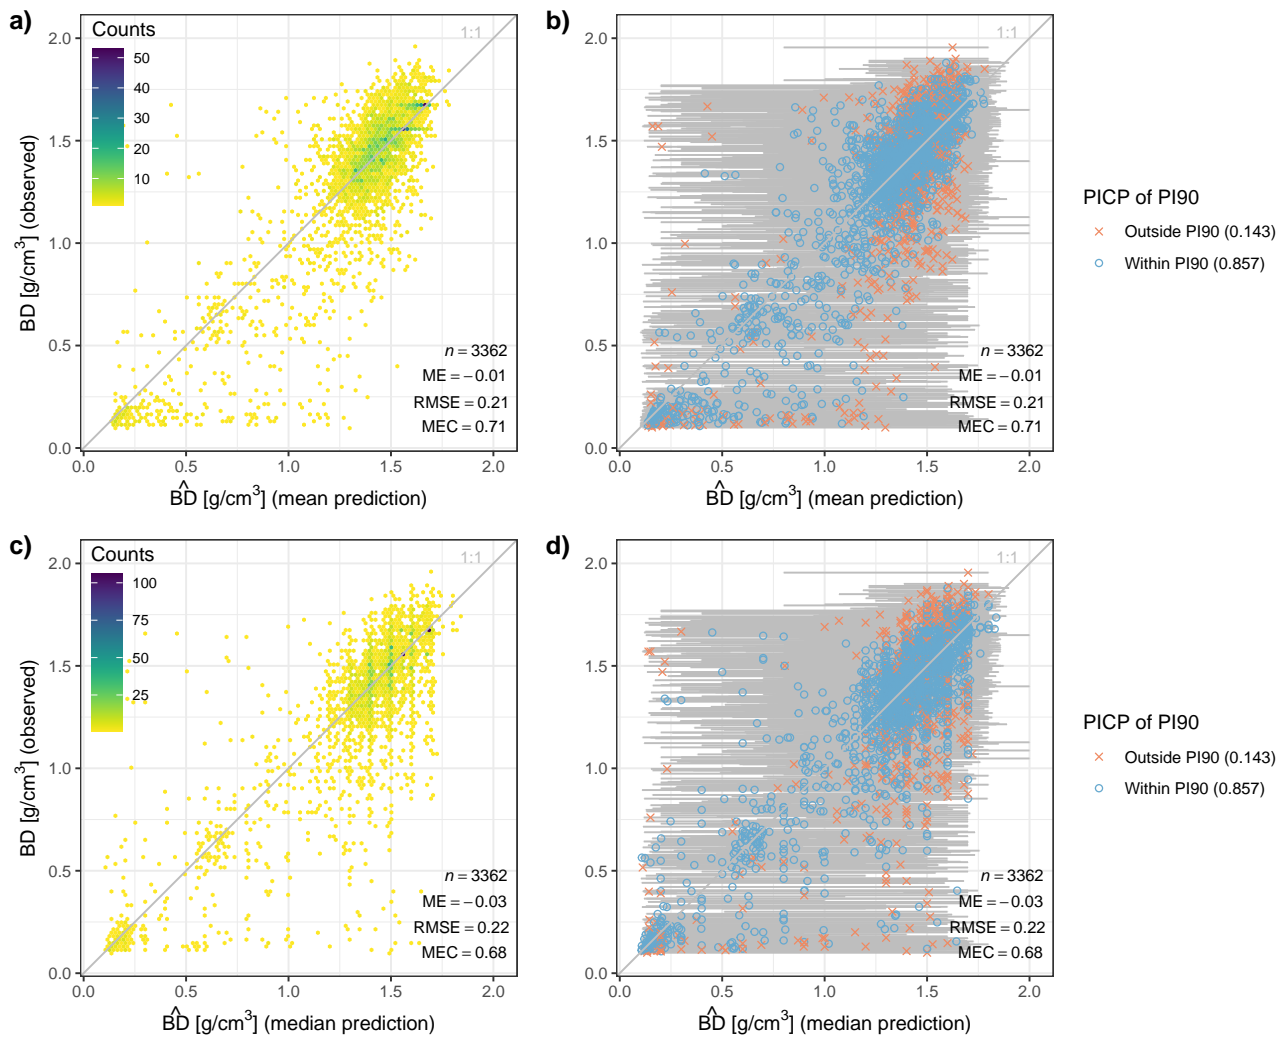

**Figure S43.** Predicted mean (a & b) and median (c & d) BD [g cm<sup>-3</sup>] on the x-axis vs. measured BD [g cm<sup>-3</sup>] on the y-axis. Accuracy plots and metrics (ME, RMSE and MEC) were computed using 10-fold cross-validation of PFB laboratory measurements (Sect. 2.6). Plots a & c emphasize point density whereas plots b & d visualize prediction uncertainty (PI90 as error bars) and the PICP90 in the figure legends.

### S4.3 Variable importance

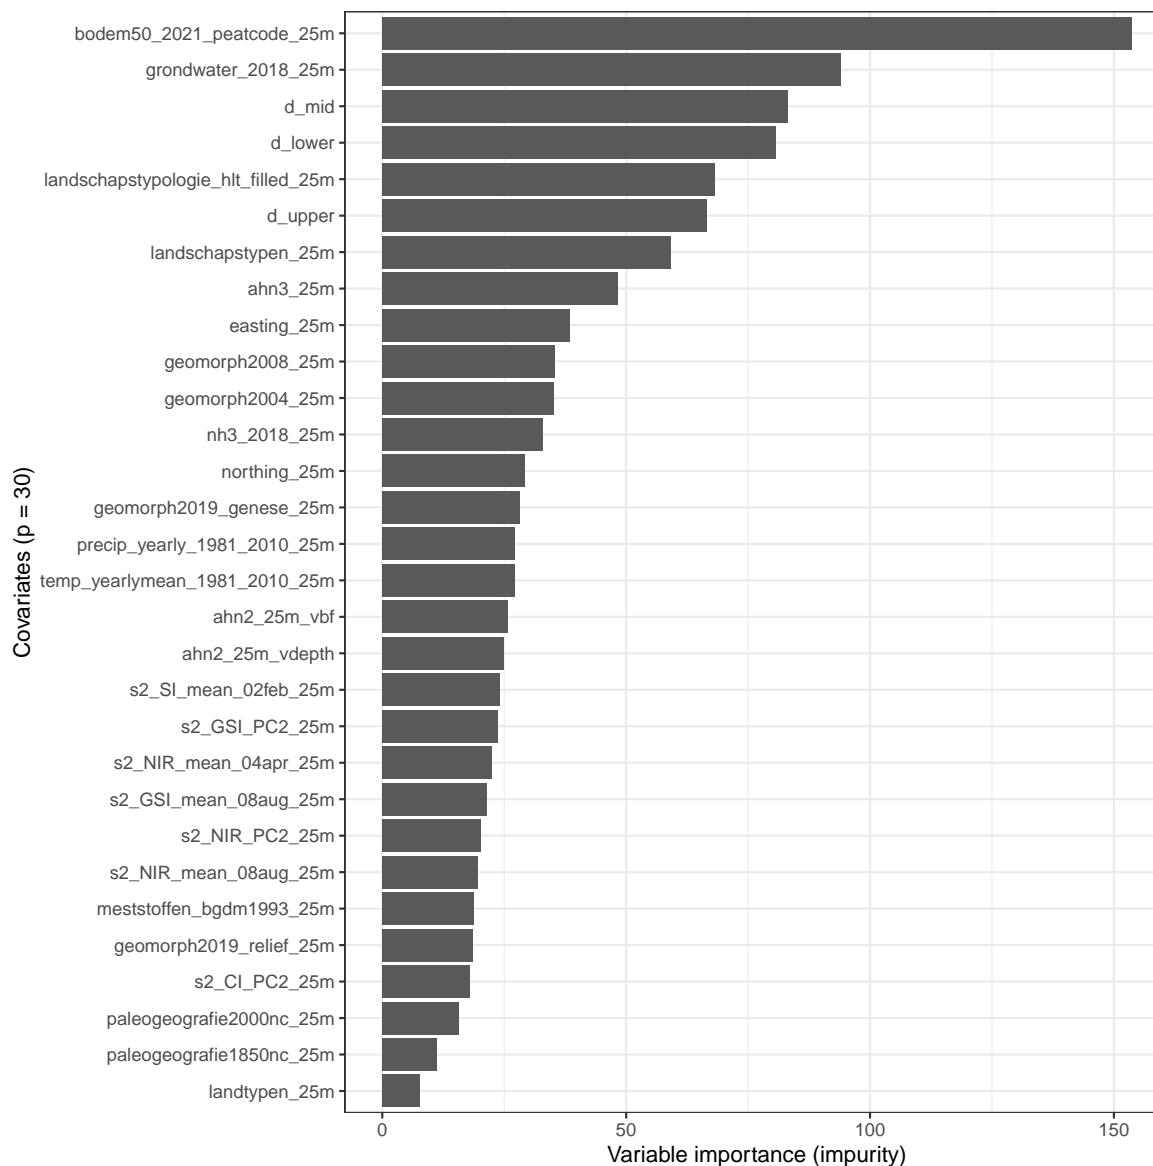

**Figure S44.** Variable importance for predicting BD, assessed using the impurity method (Breiman, 2002) (Sect. 2.4). A description of the covariate names (y-axis) can be found in the model code (<https://git.wur.nl/helfe001/bis-4d>) and covariate dataset (Helfenstein et al., 2024a). "d\_upper", "d\_mid" and "d\_lower" denote the upper, midpoint and lower boundary of a sampled soil horizon during calibration and target depth layer during prediction (Sect. 2.2, Table 5). Variable importance using impurity favors covariates with more distinct values and is biased against categorical covariates because these have a finite number of binary splits due to limited number of classes (Sandri and Zuccolotto, 2008, 2010).

## S5 Soil organic matter (SOM)

### 55 S5.1 Prediction maps

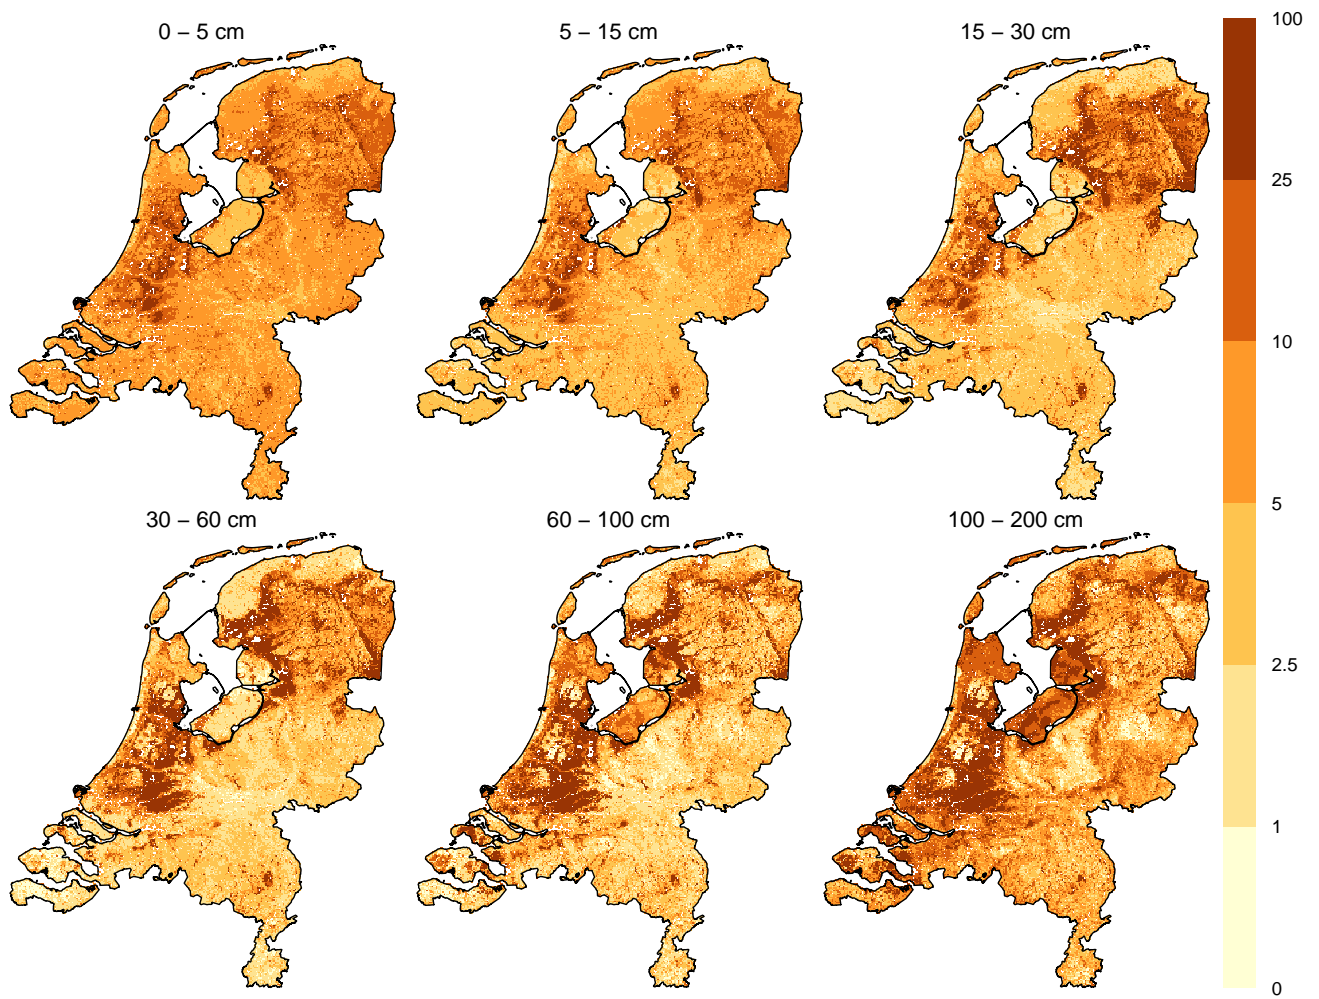

**Figure S45.** Predicted mean SOM [%] for every GSM depth layer in 2023.

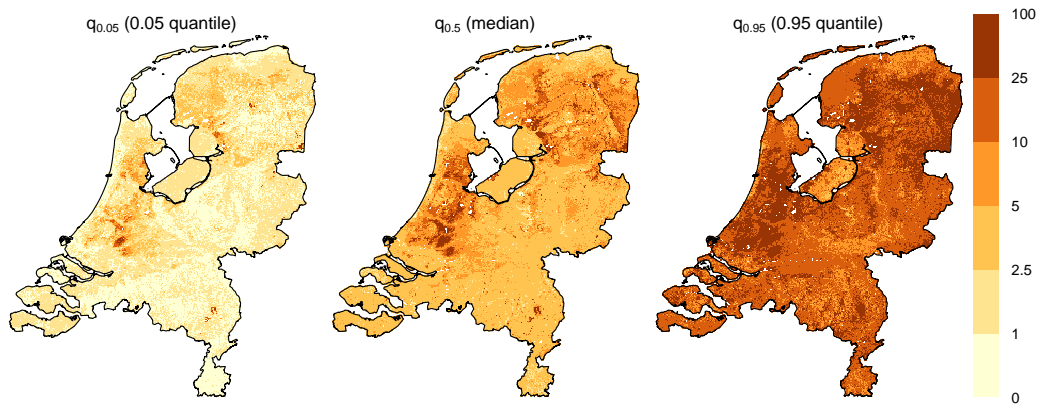

**Figure S46.** Predicted 5<sup>th</sup>, 50<sup>th</sup> (median) and 95<sup>th</sup> quantile for SOM [%] from 0–5 cm depth in 2023.

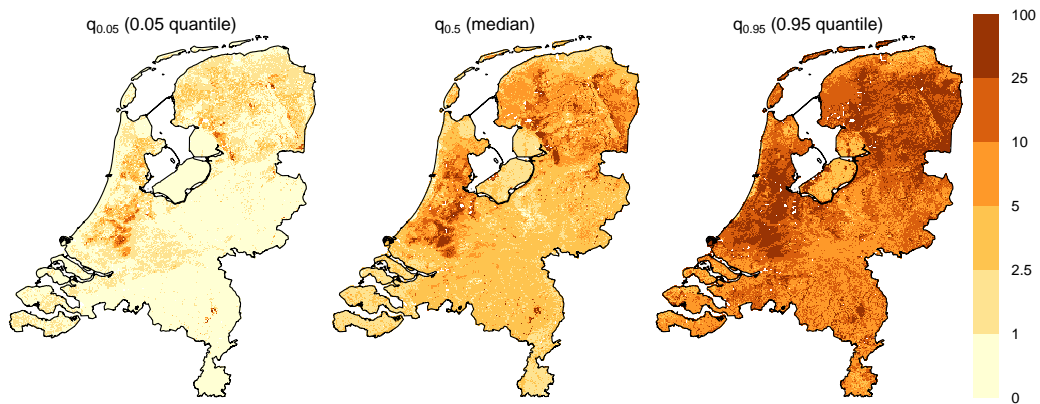

**Figure S47.** Predicted 5<sup>th</sup>, 50<sup>th</sup> (median) and 95<sup>th</sup> quantile for SOM [%] from 5–15 cm depth in 2023.

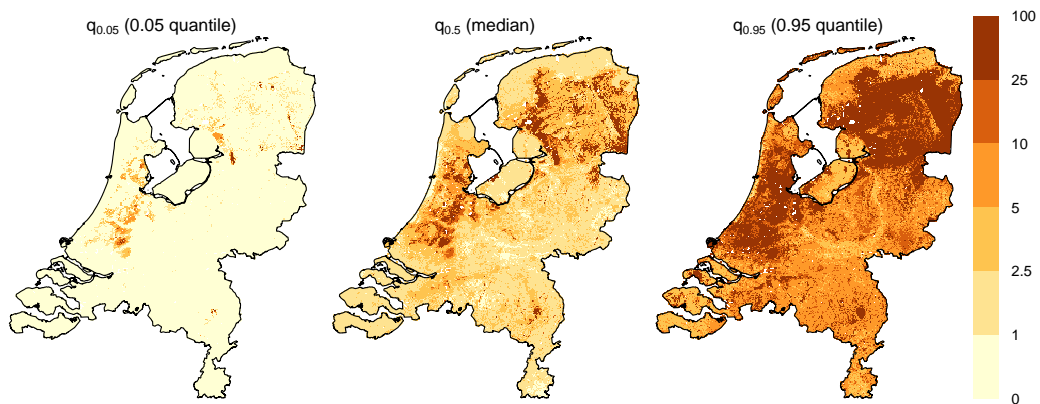

**Figure S48.** Predicted 5<sup>th</sup>, 50<sup>th</sup> (median) and 95<sup>th</sup> quantile for SOM [%] from 15–30 cm depth in 2023.

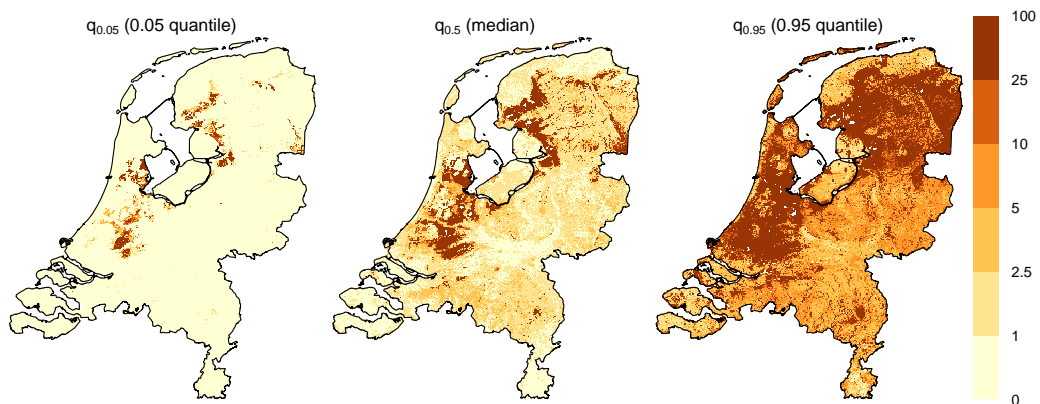

**Figure S49.** Predicted 5<sup>th</sup>, 50<sup>th</sup> (median) and 95<sup>th</sup> quantile for SOM [%] from 30–60 cm depth in 2023.

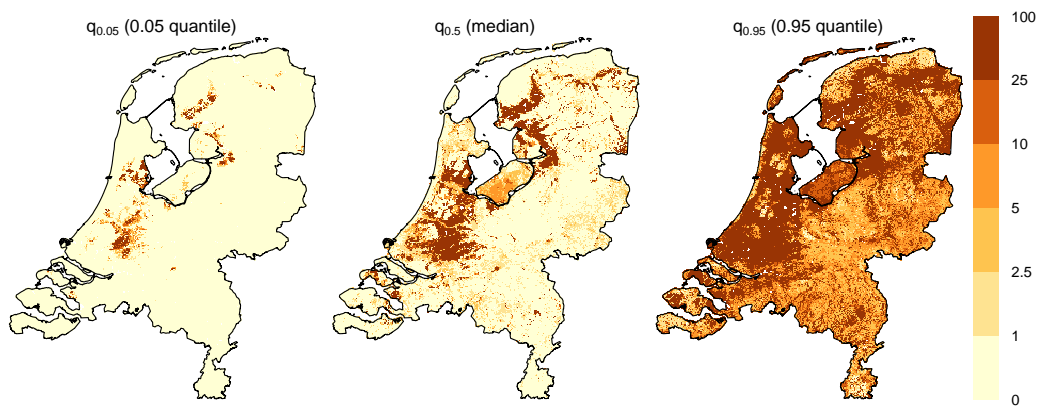

**Figure S50.** Predicted 5<sup>th</sup>, 50<sup>th</sup> (median) and 95<sup>th</sup> quantile for SOM [%] from 60–100 cm depth in 2023.

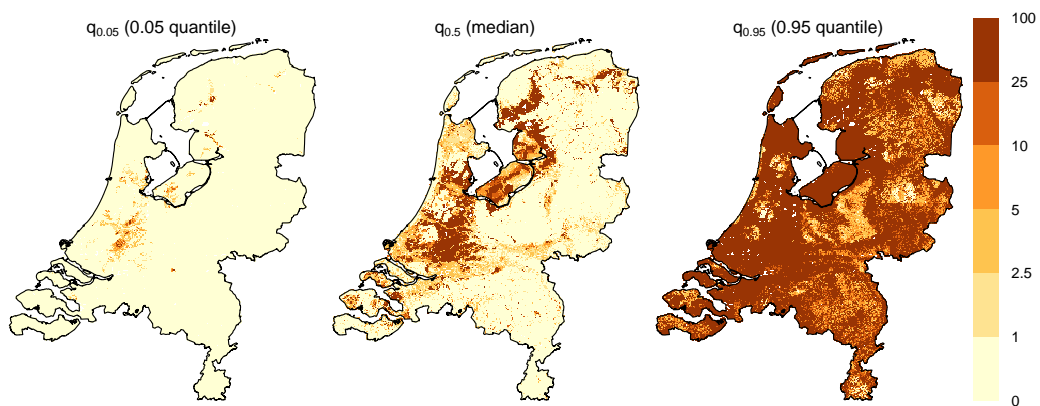

**Figure S51.** Predicted 5<sup>th</sup>, 50<sup>th</sup> (median) and 95<sup>th</sup> quantile for SOM [%] from 100–200 cm depth in 2023.

## S5.2 Accuracy assessment

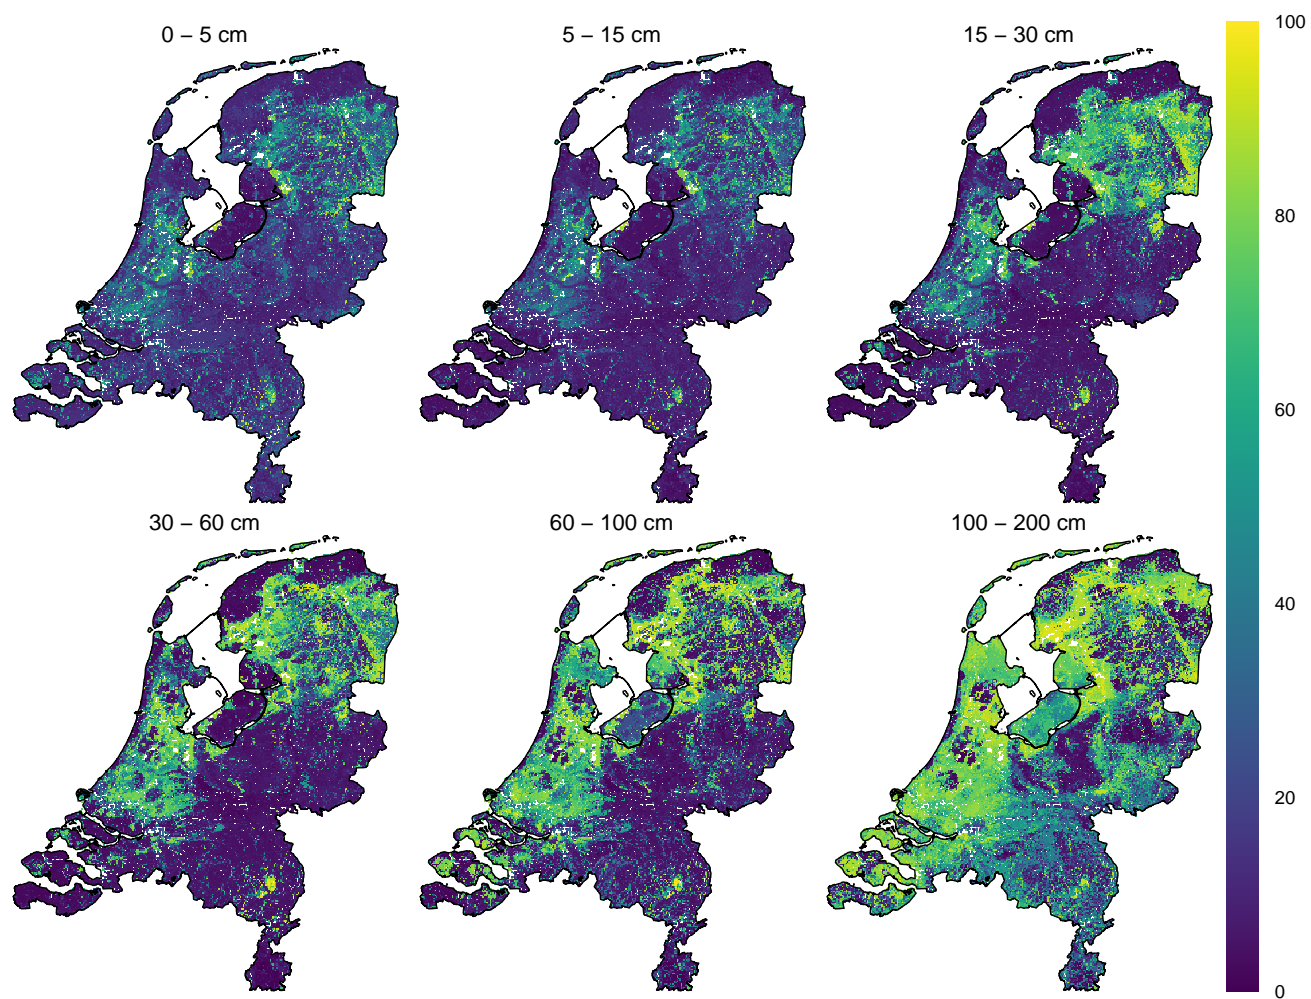

**Figure S52.** Maps of the PI90 as a measure of prediction uncertainty for SOM [%] for every GSM depth layer in 2023.



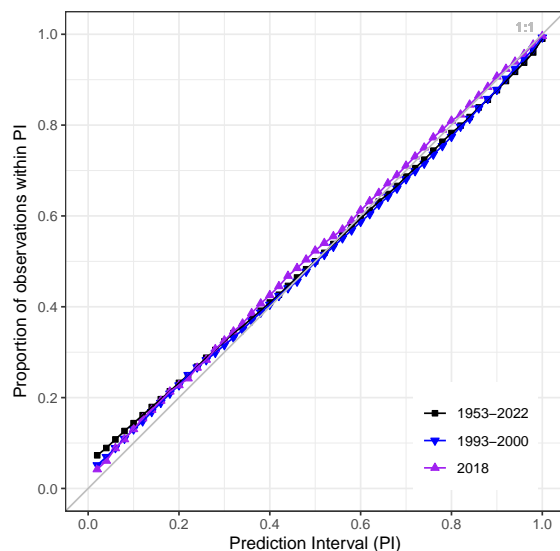

**Figure S53.** Prediction interval coverage probability (PICP) for prediction intervals between 0.02 and 1 of data used for different statistical validation strategies: 10-fold cross-validation of PFB laboratory measurements between 1953-2022, LSK laboratory measurements from 1993-2000 and CCNL laboratory measurements from 2018 (Sect. 2.1.2, 2.6 & Helfenstein et al., 2024b). The closer the points are to the 1:1 line, the more accurate the prediction uncertainty. Lines connecting the points do not represent actual data and are only for visual guidance.

**Table S5.** Model accuracy metrics of mean and median SOM [%] predictions using design-based inference of LSK laboratory measurements from 1993-2000 (Sect. 2.6). ME = mean error; RMSE = root mean squared error; MEC = model efficiency coefficient; PICP90 = prediction interval coverage probability of the PI90. The lower and upper 97.5 % confidence limits of the accuracy metrics were computed using design-based inference according to de Gruijter et al. (2006) and Sect. 2.6.2 of Helfenstein et al. (2022). Together, the lower and upper 97.5 % confidence limits give the 95 % confidence interval (CI95).

| Prediction | Depth (cm) | n    | ME           | CI95 of ME   | RMSE         | CI95 of RMSE | MEC         | CI95 of MEC | PICP90      |
|------------|------------|------|--------------|--------------|--------------|--------------|-------------|-------------|-------------|
| Mean       | 0 - 15     | 1085 | <b>0.5</b>   | 0.22, 0.78   | <b>4.84</b>  | 4.25, 5.37   | <b>0.52</b> | 0.38, 0.61  | <b>0.75</b> |
|            | 15 - 30    | 205  | <b>-0.64</b> | -1.78, 0.5   | <b>5.66</b>  | 2.15, 7.71   | <b>0.53</b> | 0.07, 0.75  | <b>0.85</b> |
|            | 30 - 60    | 1145 | <b>-2.1</b>  | -2.63, -1.56 | <b>9.2</b>   | 8.26, 10.06  | <b>0.34</b> | 0.11, 0.51  | <b>0.87</b> |
|            | 60 - 100   | 1075 | <b>-3.01</b> | -3.85, -2.17 | <b>9.92</b>  | 8.87, 10.87  | <b>0.46</b> | 0.12, 0.61  | <b>0.93</b> |
|            | 100 - 200  | 774  | <b>-3.16</b> | -4, -2.31    | <b>10.41</b> | 8.4, 12.09   | <b>0.44</b> | 0.32, 0.54  | <b>0.96</b> |
| Median     | 0 - 15     | 1085 | <b>1.37</b>  | 1.11, 1.64   | <b>5.08</b>  | 4.37, 5.7    | <b>0.48</b> | 0.35, 0.58  | <b>0.75</b> |
|            | 15 - 30    | 205  | <b>0.72</b>  | -0.19, 1.64  | <b>4.68</b>  | NA, 6.74     | <b>0.68</b> | 0.4, 0.82   | <b>0.85</b> |
|            | 30 - 60    | 1145 | <b>0.46</b>  | -0.05, 0.98  | <b>9.72</b>  | 8.31, 10.95  | <b>0.27</b> | -0.01, 0.48 | <b>0.87</b> |
|            | 60 - 100   | 1075 | <b>0.43</b>  | -0.11, 0.97  | <b>9.22</b>  | 7.64, 10.57  | <b>0.53</b> | 0.19, 0.7   | <b>0.93</b> |
|            | 100 - 200  | 774  | <b>0.92</b>  | 0.08, 1.76   | <b>9.47</b>  | 6.27, 11.84  | <b>0.54</b> | 0.39, 0.69  | <b>0.96</b> |

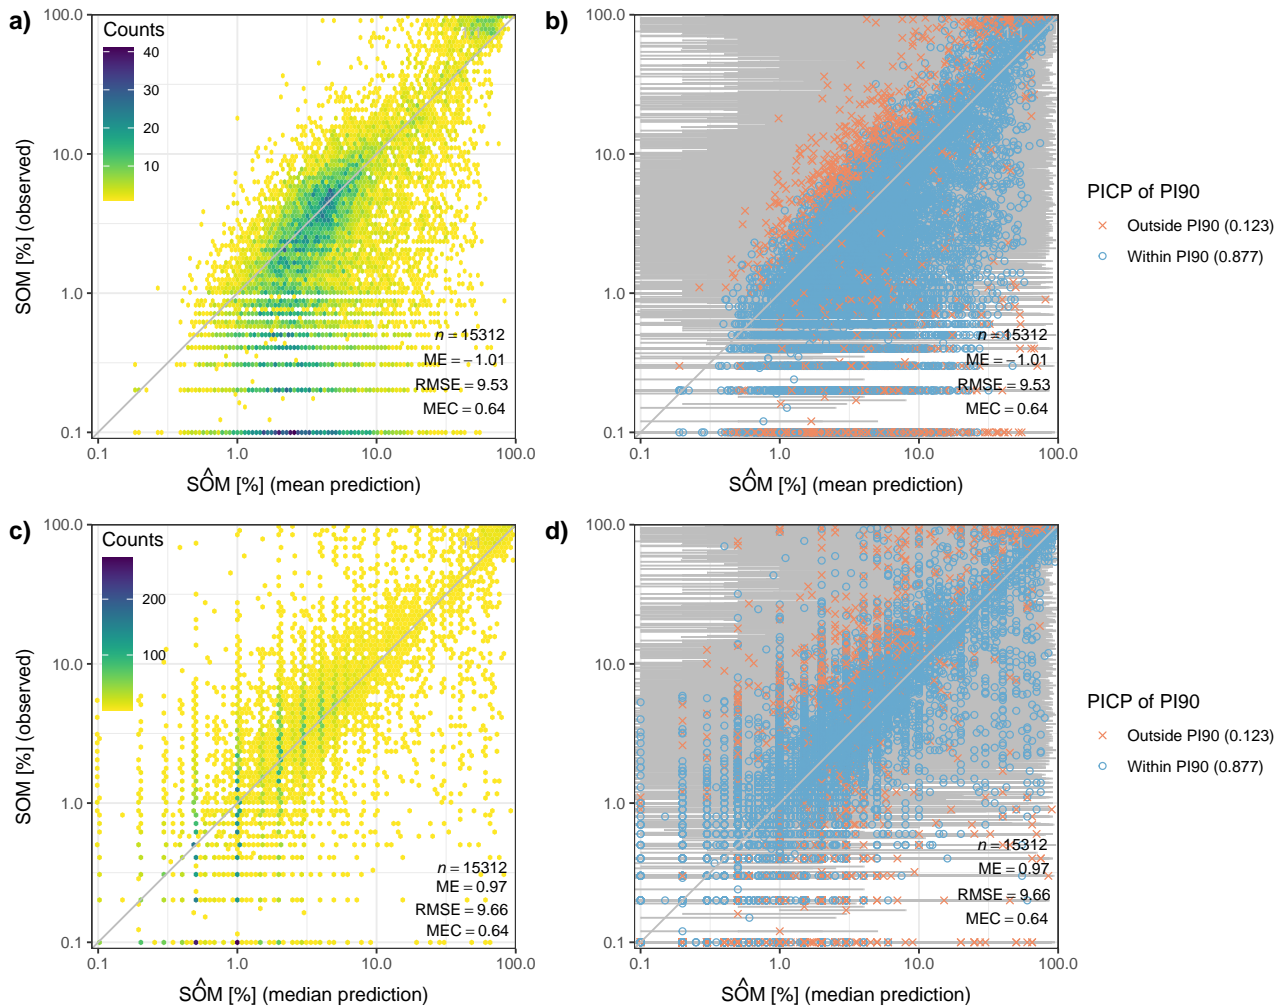

**Figure S54.** Predicted mean (a & b) and median (c & d) SOM [%] on the x-axis vs. measured SOM content [%] on the y-axis (log-scale). Accuracy plots and metrics (ME, RMSE and MEC) were computed using 10-fold cross-validation of PFB laboratory measurements between 1953-2022 (Sect. 2.6). Plots a & c emphasize point density whereas plots b & d visualize prediction uncertainty (PI90 as error bars) and the PICP90 in the figure legends.

### S5.3 Variable importance

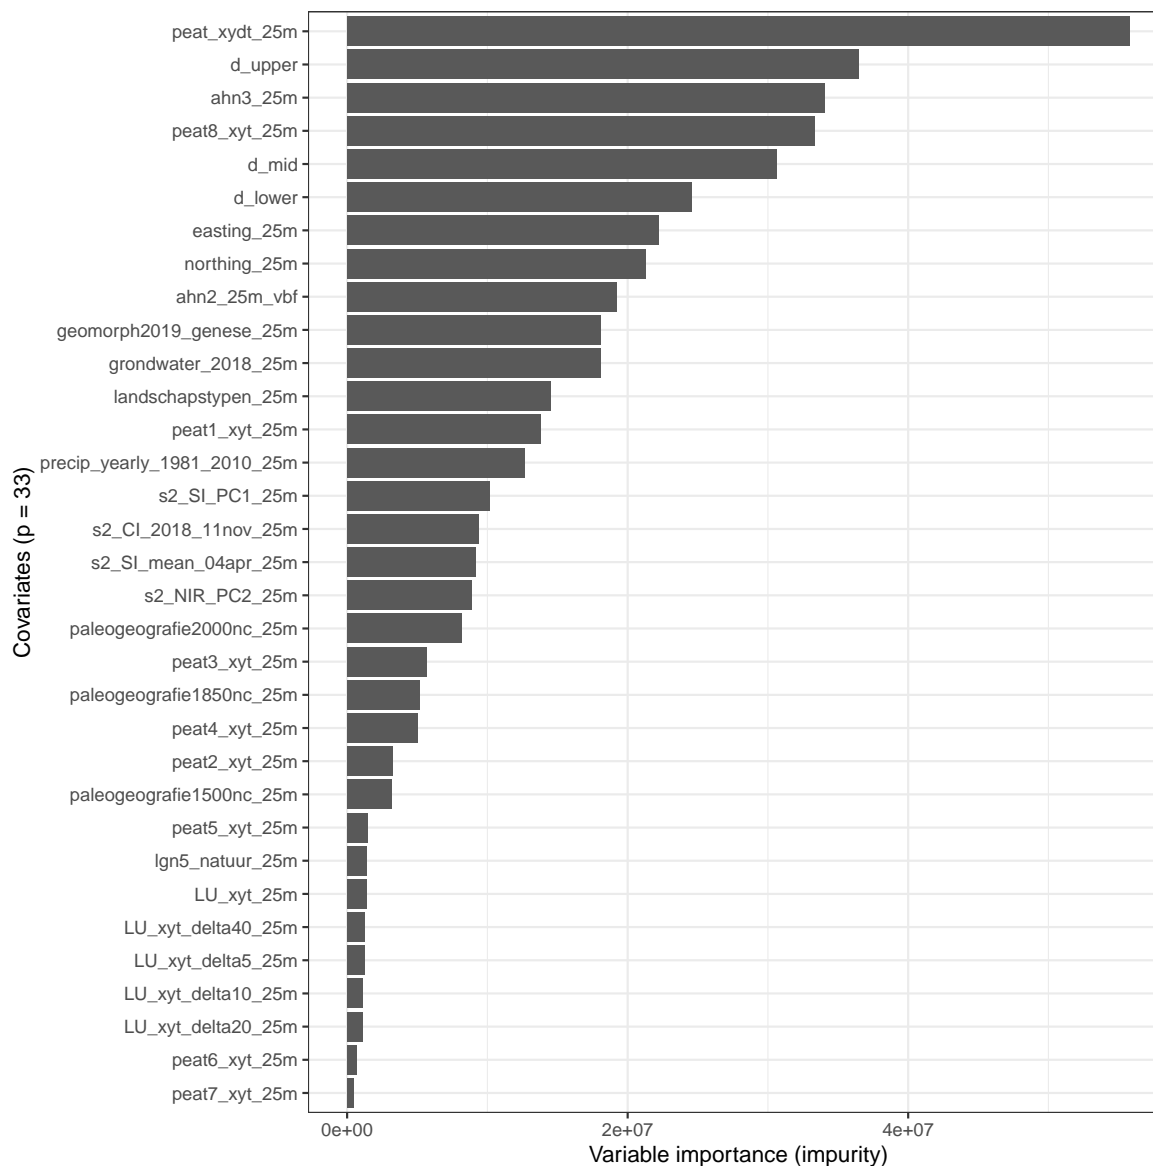

**Figure S55.** Variable importance for predicting SOM [%], assessed using the impurity method (Breiman, 2002) (Sect. 2.4). A description of the covariate names (y-axis) can be found in the model code (<https://git.wur.nl/helfe001/bis-4d>) and covariate dataset (Helfenstein et al., 2024a). "d\_upper", "d\_mid" and "d\_lower" denote the upper, midpoint and lower boundary of a sampled soil horizon during calibration and target depth layer during prediction (Sect. 2.2, Table 5). 2D+T and 3D+T dynamic covariates are denoted with "xyt" and "xydt", respectively (Helfenstein et al., 2024b, Fig. S3 & Table S1). The impurity method favors covariates with more distinct values and is biased against categorical covariates because these have a finite number of binary splits due to limited number of classes (Sandri and Zuccolotto, 2008, 2010).

## S6 pH

### S6.1 Prediction maps

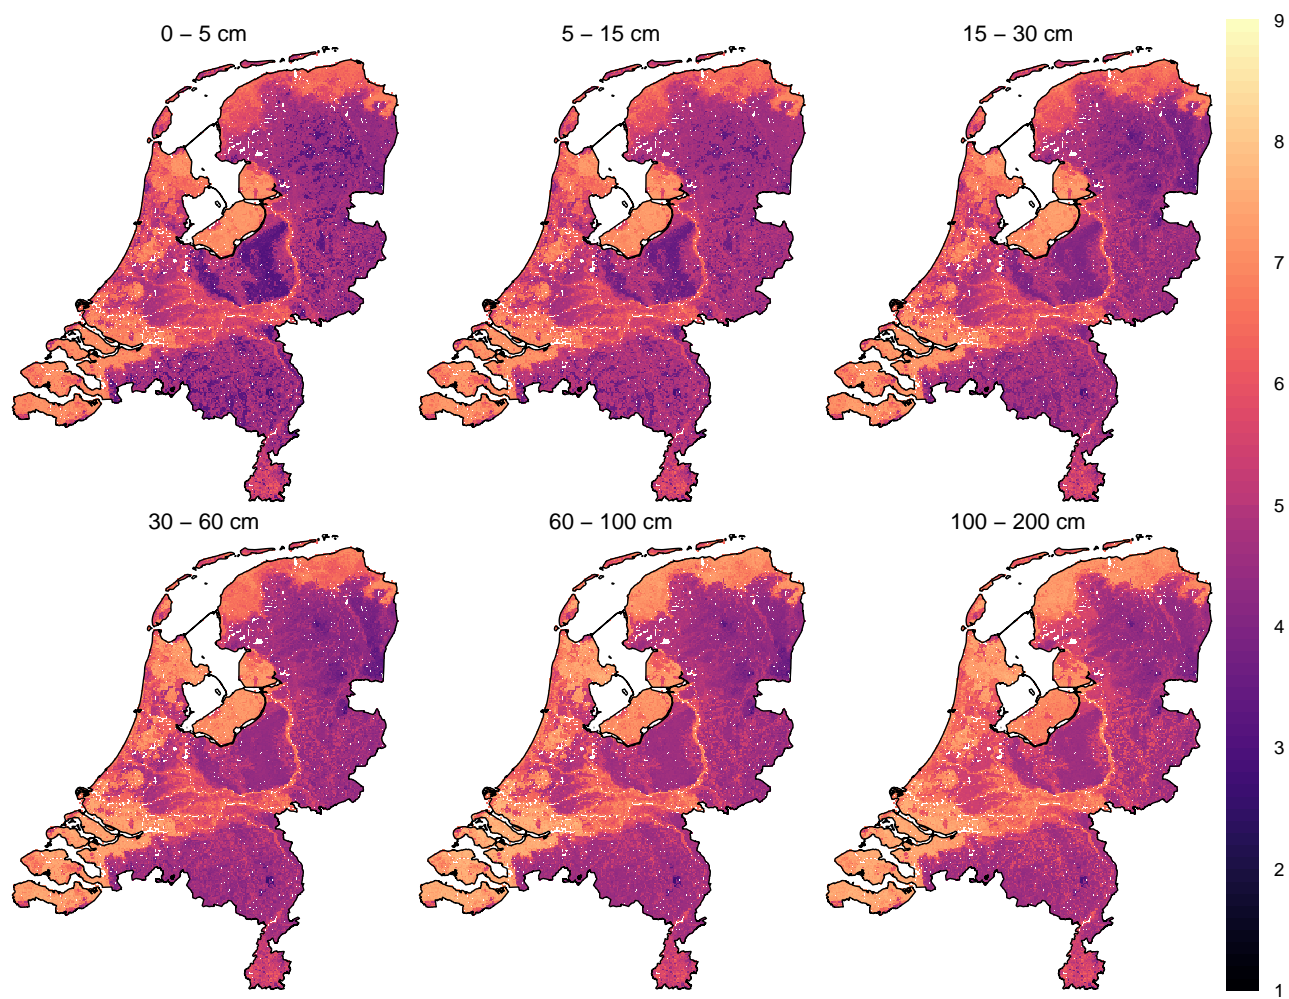

**Figure S56.** Predicted mean pH [KCl] for every GSM depth layer.

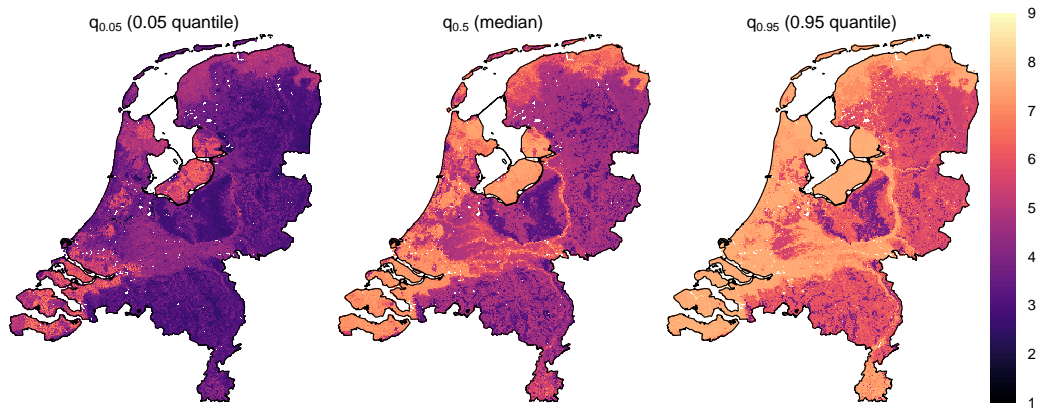

**Figure S57.** Predicted 5<sup>th</sup>, 50<sup>th</sup> (median) and 95<sup>th</sup> quantile for pH [KCl] from 0–5 cm depth.

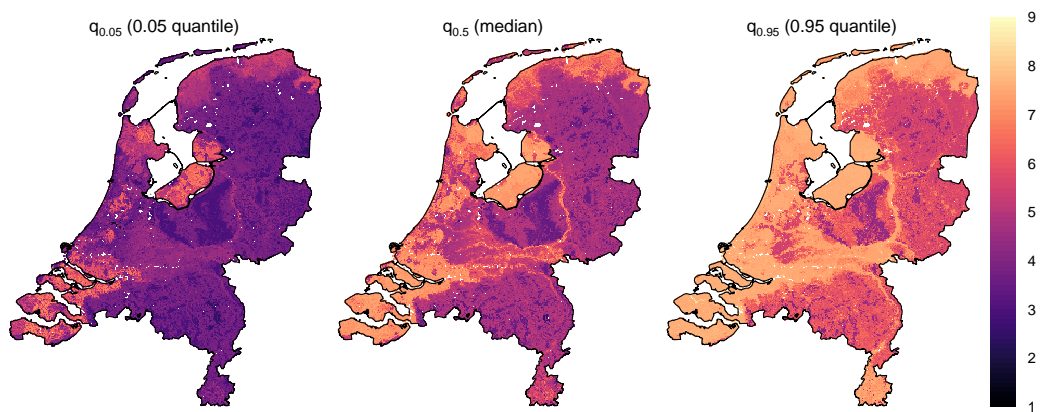

**Figure S58.** Predicted 5<sup>th</sup>, 50<sup>th</sup> (median) and 95<sup>th</sup> quantile for pH [KCl] from 5–15 cm depth.

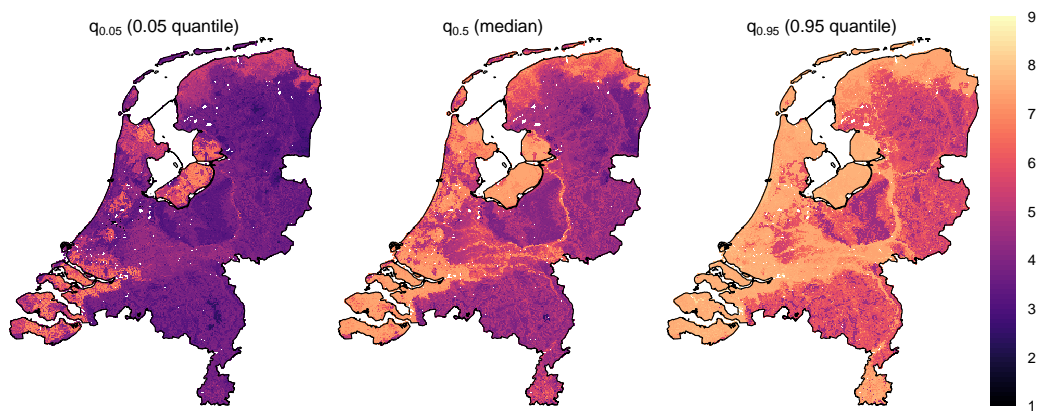

**Figure S59.** Predicted 5<sup>th</sup>, 50<sup>th</sup> (median) and 95<sup>th</sup> quantile for pH [KCl] from 15–30 cm depth.

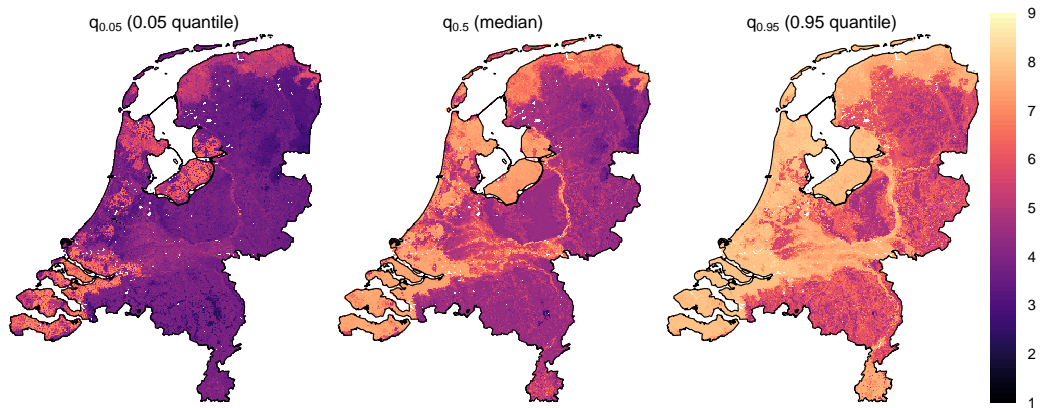

**Figure S60.** Predicted 5<sup>th</sup>, 50<sup>th</sup> (median) and 95<sup>th</sup> quantile for pH [KCl] from 30–60 cm depth.

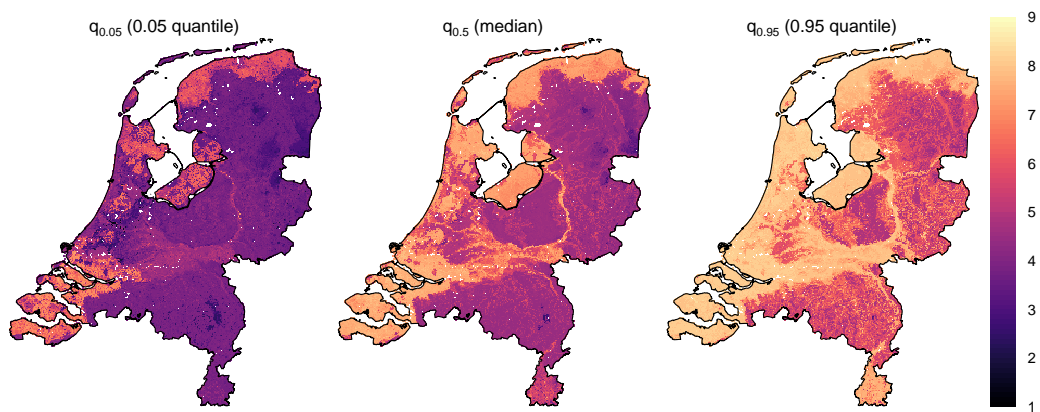

**Figure S61.** Predicted 5<sup>th</sup>, 50<sup>th</sup> (median) and 95<sup>th</sup> quantile for pH [KCl] from 60–100 cm depth.

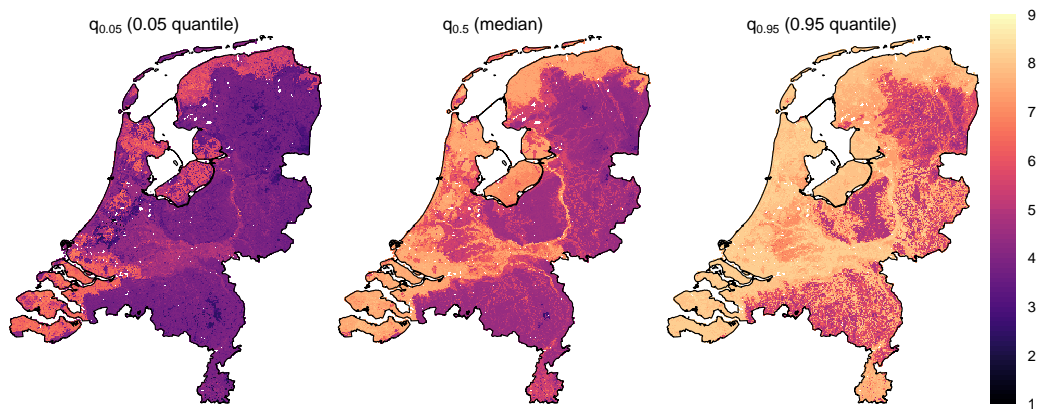

**Figure S62.** Predicted 5<sup>th</sup>, 50<sup>th</sup> (median) and 95<sup>th</sup> quantile for pH [KCl] from 100–200 cm depth.



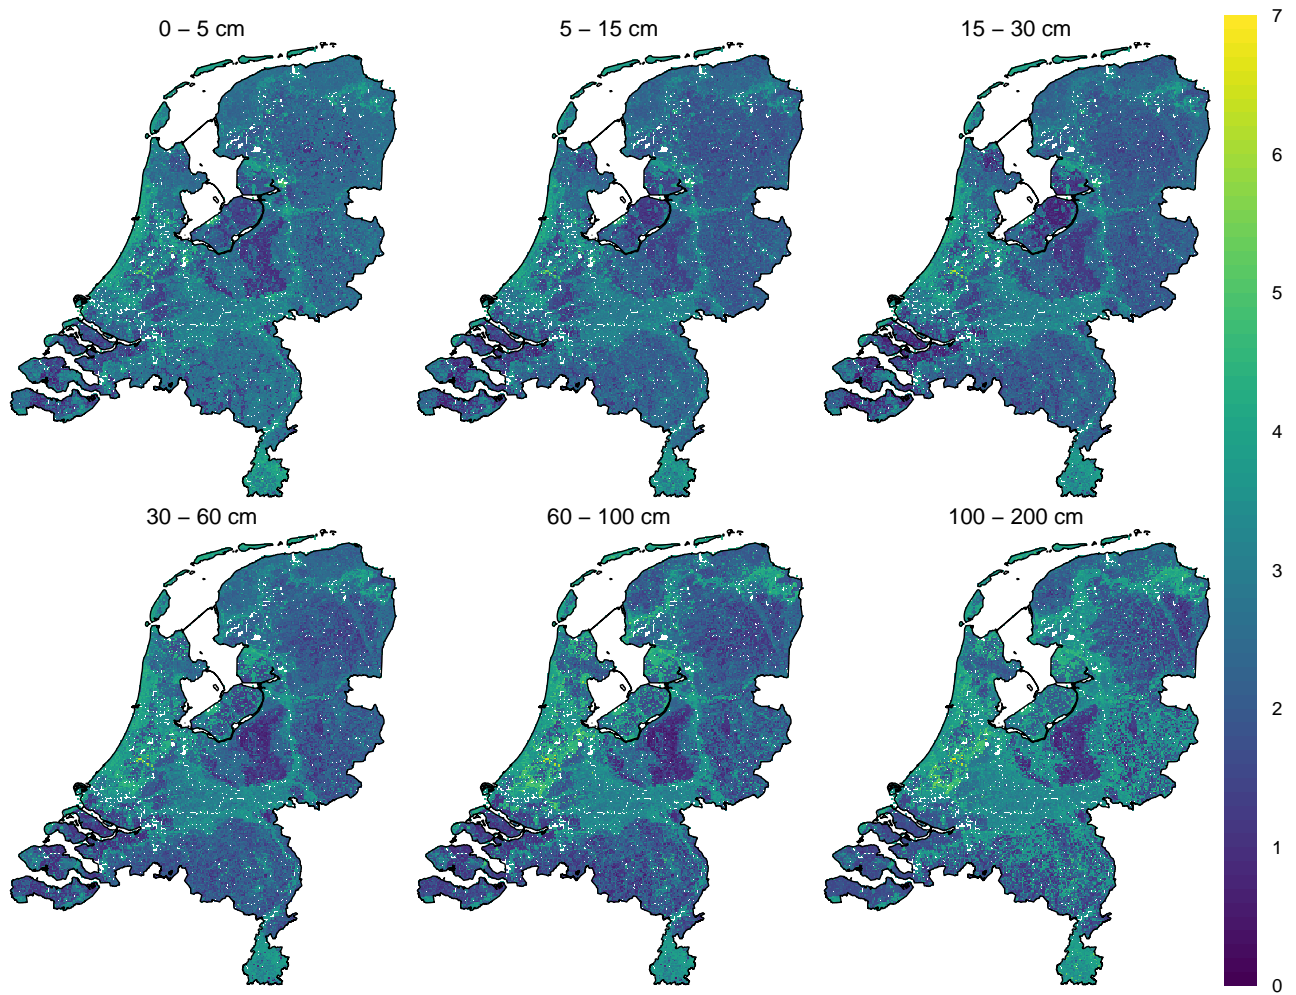

**Figure S63.** Maps of the PI90 as a measure of prediction uncertainty for pH [KCl] for every GSM depth layer.

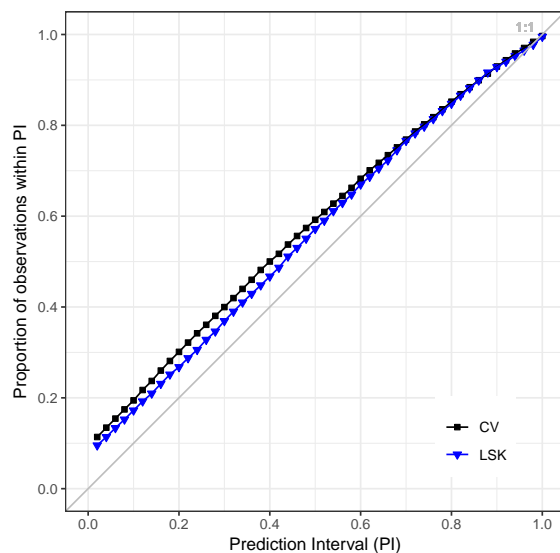

**Figure S64.** Prediction interval coverage probability (PICP) for prediction intervals between 0.02 and 1 of data used for different statistical validation strategies: 10-fold cross-validation of PFB laboratory measurements (CV) and LSK laboratory measurements (Sect. 2.6). The closer the points are to the 1:1 line, the more accurate the prediction uncertainty. Lines connecting the points do not represent actual data and are only for visual guidance.

**Table S6.** Model accuracy metrics of mean and median pH [KCl] predictions using design-based inference of LSK laboratory measurements (Sect. 2.6). ME = mean error; RMSE = root mean squared error; MEC = model efficiency coefficient; PICP90 = prediction interval coverage probability of the PI90. The lower and upper 97.5 % confidence limits of the accuracy metrics were computed using design-based inference according to de Gruijter et al. (2006) and Sect. 2.6.2 of Helfenstein et al. (2022). Together, the lower and upper 97.5 % confidence limits give the 95 % confidence interval (CI95).

| Prediction | Depth (cm) | n    | ME          | CI95 of ME  | RMSE        | CI95 of RMSE | MEC         | CI95 of MEC | PICP90      |
|------------|------------|------|-------------|-------------|-------------|--------------|-------------|-------------|-------------|
| Mean       | 0 - 15     | 1250 | <b>0.14</b> | 0.09, 0.18  | <b>0.74</b> | 0.71, 0.77   | <b>0.71</b> | 0.68, 0.73  | <b>0.92</b> |
|            | 15 - 30    | 245  | <b>0.16</b> | 0.06, 0.26  | <b>0.68</b> | 0.57, 0.77   | <b>0.91</b> | 0.9, 0.92   | <b>0.9</b>  |
|            | 30 - 60    | 1322 | <b>0.16</b> | 0.12, 0.2   | <b>0.73</b> | 0.7, 0.77    | <b>0.73</b> | 0.7, 0.75   | <b>0.93</b> |
|            | 60 - 100   | 1248 | <b>0.09</b> | 0.05, 0.13  | <b>0.73</b> | 0.69, 0.77   | <b>0.74</b> | 0.71, 0.77  | <b>0.94</b> |
|            | 100 - 200  | 852  | <b>0.05</b> | -0.01, 0.1  | <b>0.81</b> | 0.74, 0.87   | <b>0.77</b> | 0.74, 0.8   | <b>0.92</b> |
| Median     | 0 - 15     | 1250 | <b>0.13</b> | 0.09, 0.17  | <b>0.73</b> | 0.69, 0.77   | <b>0.71</b> | 0.68, 0.74  | <b>0.92</b> |
|            | 15 - 30    | 245  | <b>0.15</b> | 0.05, 0.26  | <b>0.65</b> | 0.52, 0.77   | <b>0.92</b> | 0.91, 0.93  | <b>0.9</b>  |
|            | 30 - 60    | 1322 | <b>0.15</b> | 0.11, 0.19  | <b>0.74</b> | 0.7, 0.77    | <b>0.72</b> | 0.7, 0.75   | <b>0.93</b> |
|            | 60 - 100   | 1248 | <b>0.08</b> | 0.04, 0.12  | <b>0.73</b> | 0.68, 0.78   | <b>0.74</b> | 0.71, 0.77  | <b>0.94</b> |
|            | 100 - 200  | 852  | <b>0.05</b> | -0.01, 0.11 | <b>0.82</b> | 0.74, 0.89   | <b>0.76</b> | 0.72, 0.8   | <b>0.92</b> |



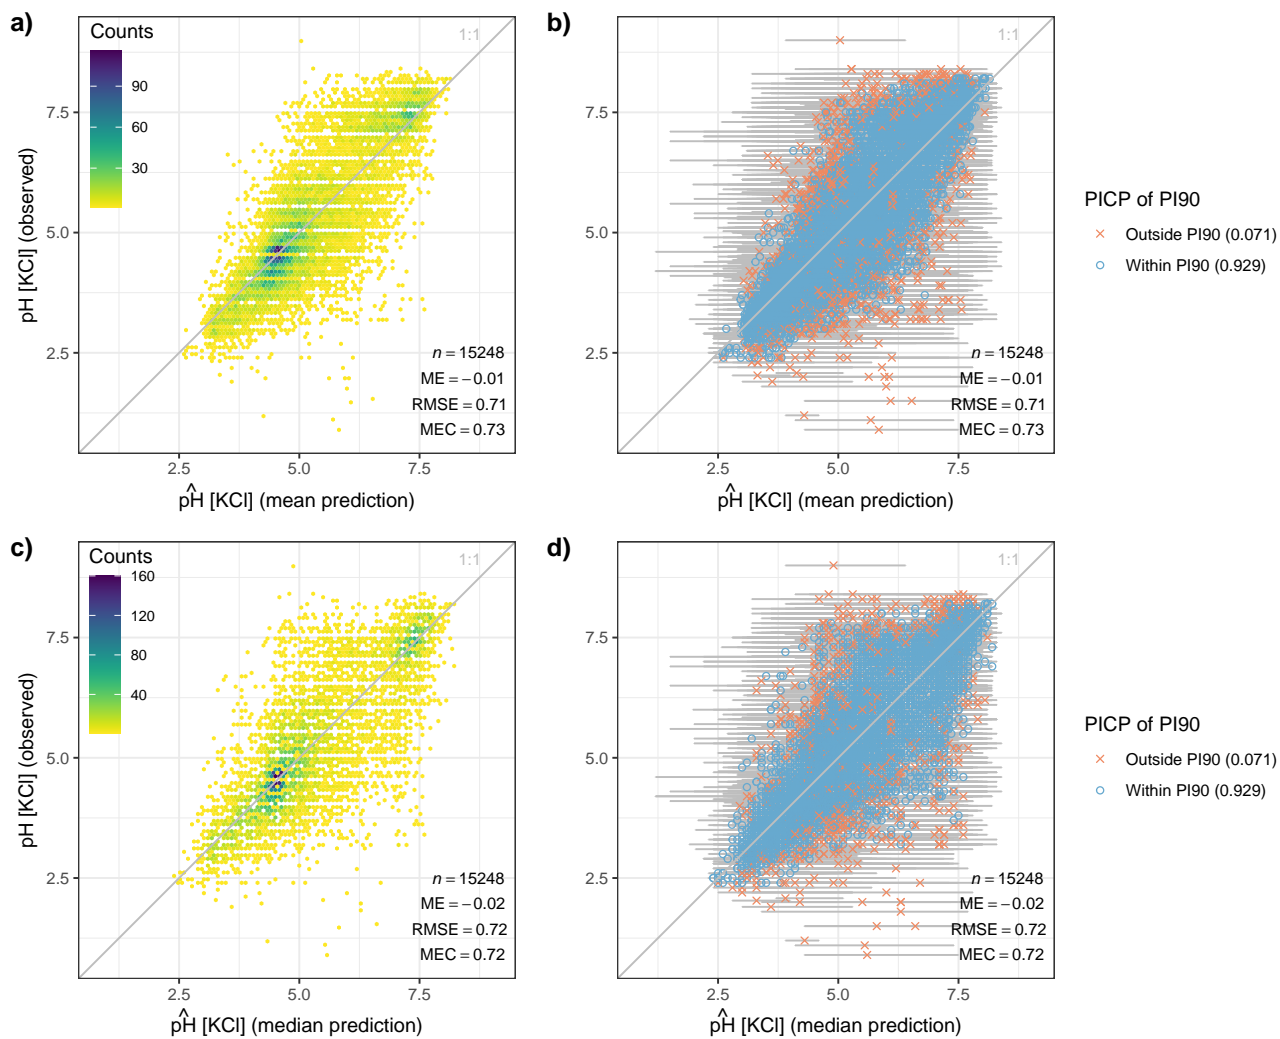

**Figure S65.** Predicted mean (a & b) and median (c & d) pH [KCl] on the x-axis vs. measured pH [KCl] on the y-axis. Accuracy plots and metrics (ME, RMSE and MEC) were computed using 10-fold cross-validation of PFB laboratory measurements (Sect. 2.6). Plots a & c emphasize point density whereas plots b & d visualize prediction uncertainty (PI90 as error bars) and the PICP90 in the figure legends.

### S6.3 Variable importance

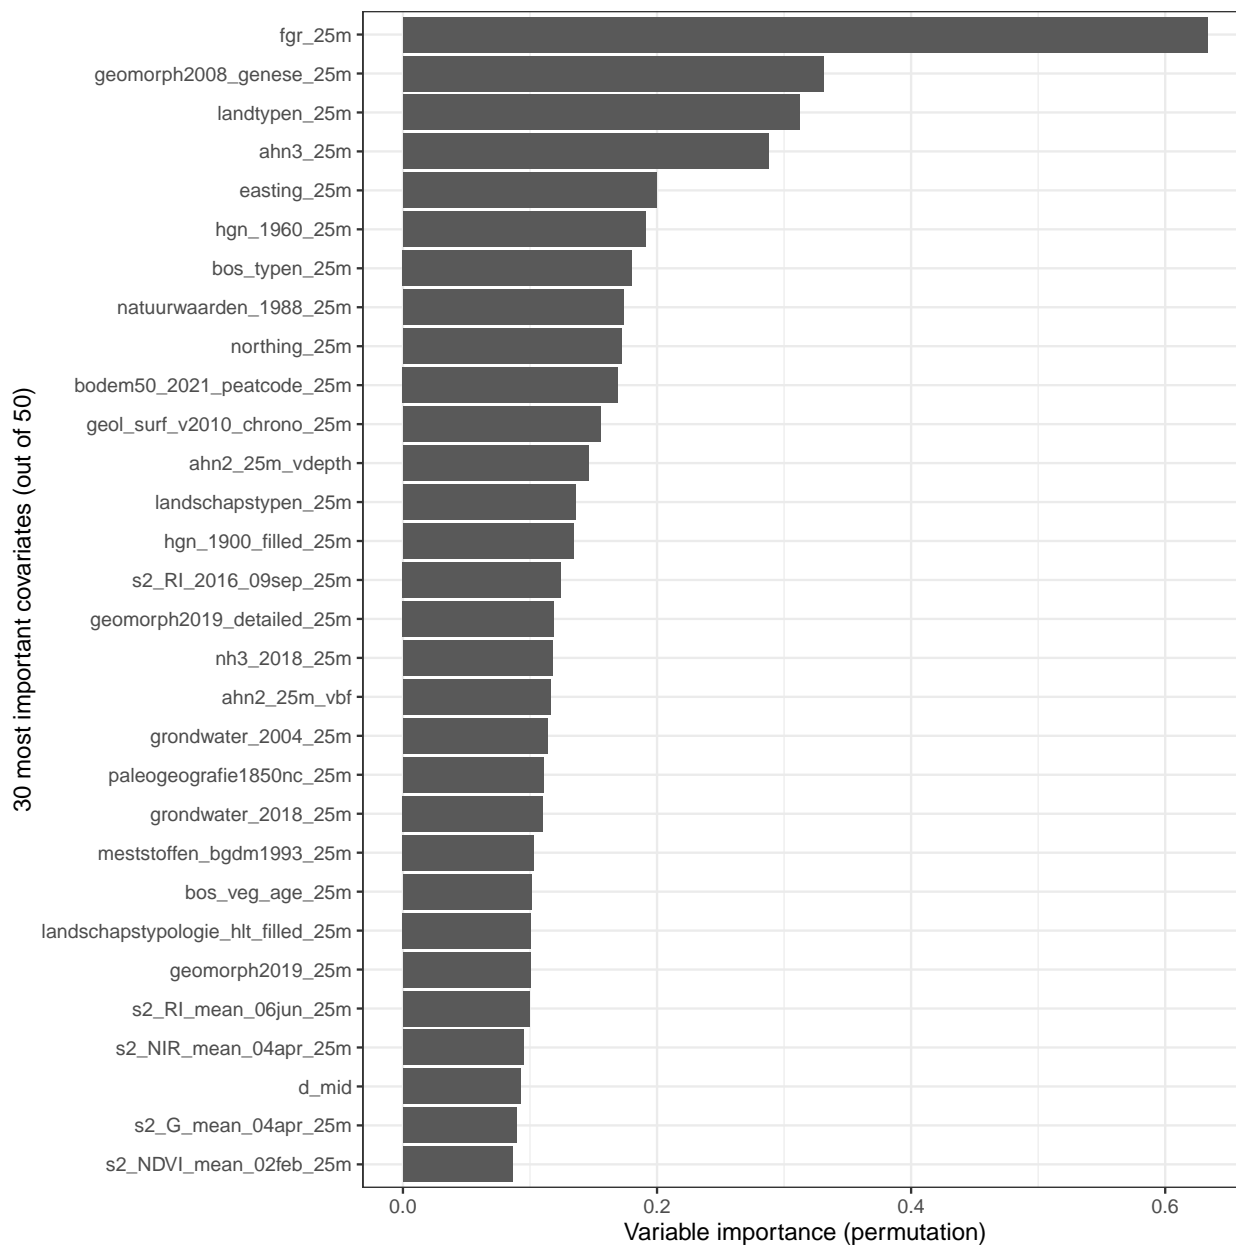

**Figure S66.** Variable importance for predicting pH, assessed using the permutation method (Breiman, 2002) (Sect. 2.4). A description of the covariate names (y-axis) can be found in the model code (<https://git.wur.nl/helfe001/bis-4d>) and covariate dataset (Helfenstein et al., 2024a). "d\_upper", "d\_mid" and "d\_lower" denote the upper, midpoint and lower boundary of a sampled soil horizon during calibration and target depth layer during prediction (Sect. 2.2, Table 5).

## S7 Total N ( $N_{\text{tot}}$ )

### S7.1 Prediction maps

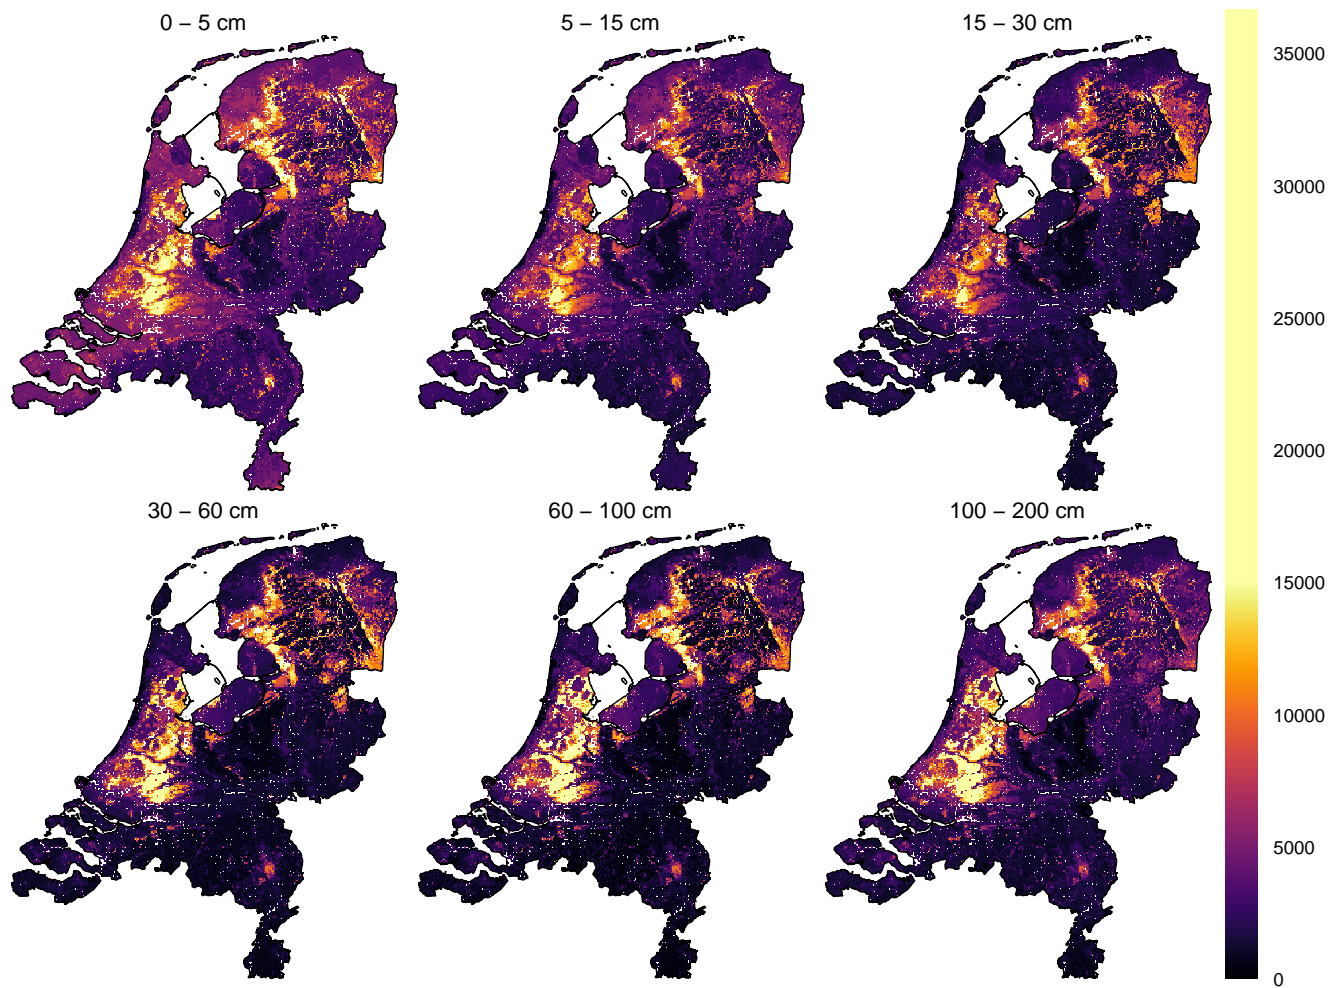

**Figure S67.** Predicted mean  $N_{\text{tot}}$  [ $\text{mg kg}^{-1}$ ] for every GSM depth layer.

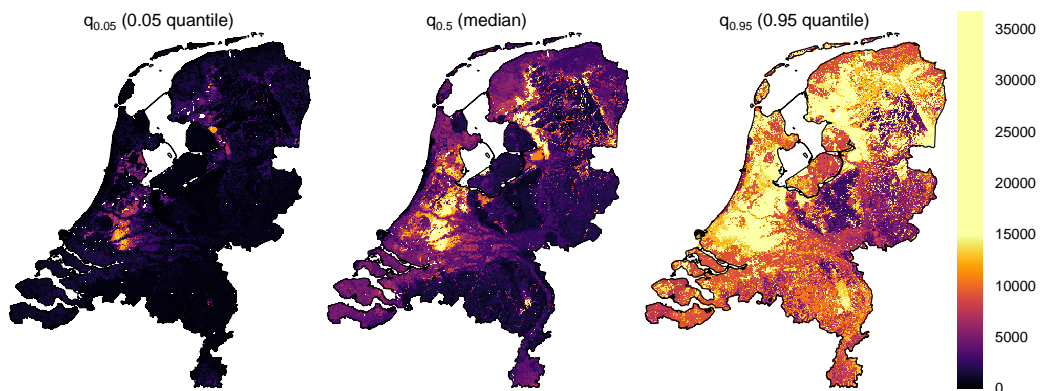

**Figure S68.** Predicted 5<sup>th</sup>, 50<sup>th</sup> (median) and 95<sup>th</sup> quantile for  $N_{\text{tot}}$  [ $\text{mg kg}^{-1}$ ] from 0–5 cm depth.

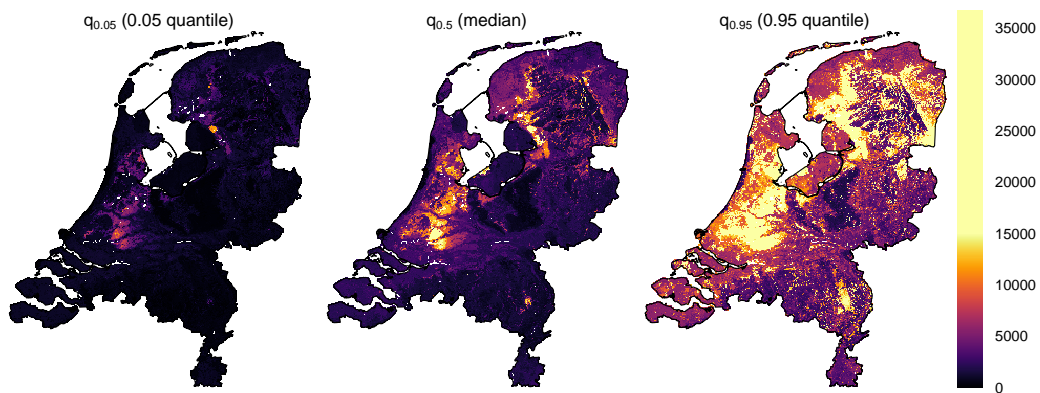

**Figure S69.** Predicted 5<sup>th</sup>, 50<sup>th</sup> (median) and 95<sup>th</sup> quantile for  $N_{\text{tot}}$  [ $\text{mg kg}^{-1}$ ] from 5–15 cm depth.

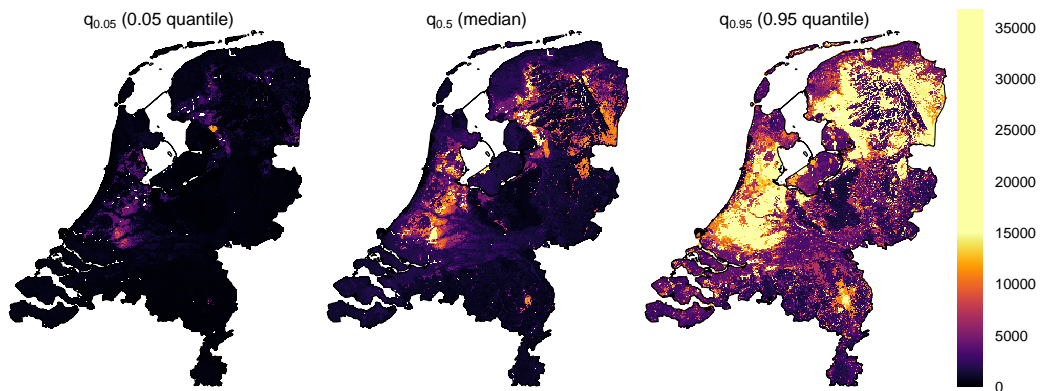

**Figure S70.** Predicted 5<sup>th</sup>, 50<sup>th</sup> (median) and 95<sup>th</sup> quantile for  $N_{\text{tot}}$  [ $\text{mg kg}^{-1}$ ] from 15–30 cm depth.

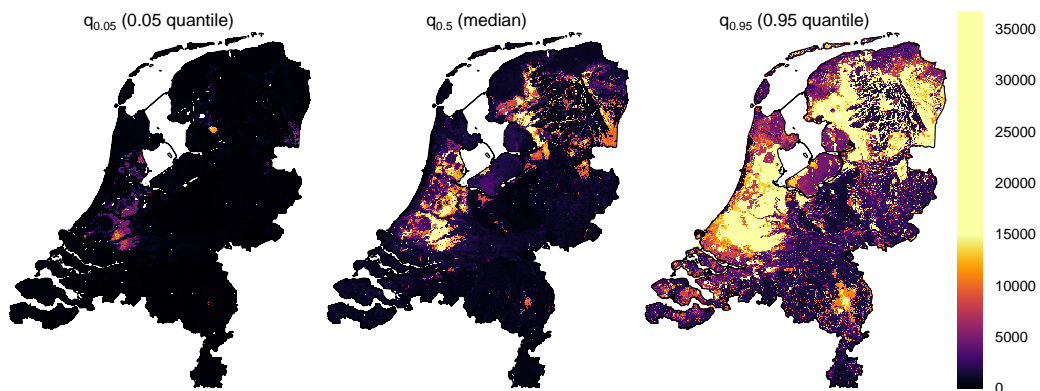

**Figure S71.** Predicted 5<sup>th</sup>, 50<sup>th</sup> (median) and 95<sup>th</sup> quantile for  $N_{\text{tot}}$  [ $\text{mg kg}^{-1}$ ] from 30–60 cm depth.

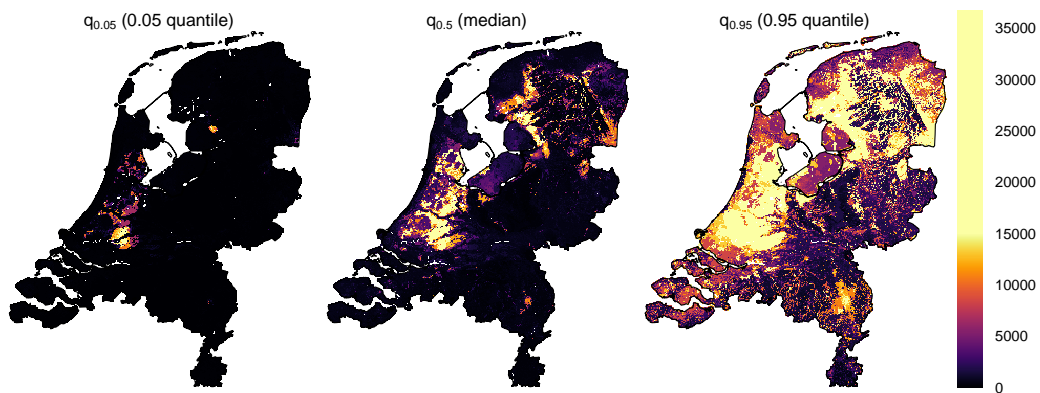

**Figure S72.** Predicted 5<sup>th</sup>, 50<sup>th</sup> (median) and 95<sup>th</sup> quantile for  $N_{\text{tot}}$  [ $\text{mg kg}^{-1}$ ] from 60–100 cm depth.

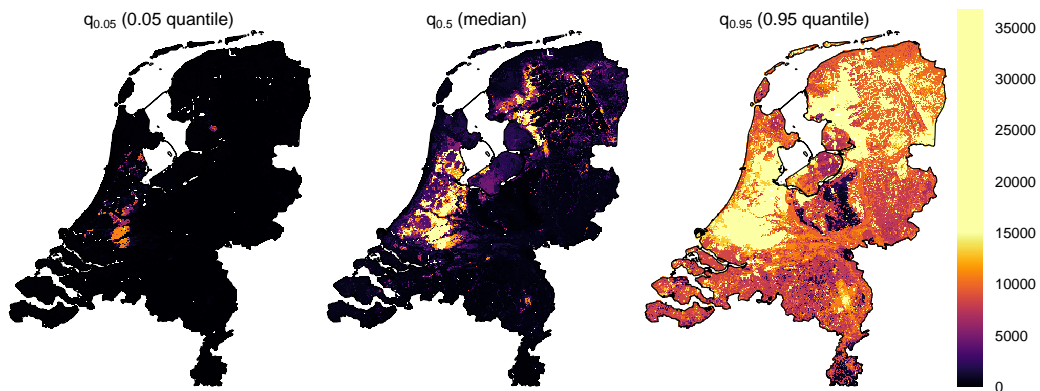

**Figure S73.** Predicted 5<sup>th</sup>, 50<sup>th</sup> (median) and 95<sup>th</sup> quantile for  $N_{\text{tot}}$  [ $\text{mg kg}^{-1}$ ] from 100–200 cm depth.



## S7.2 Accuracy assessment

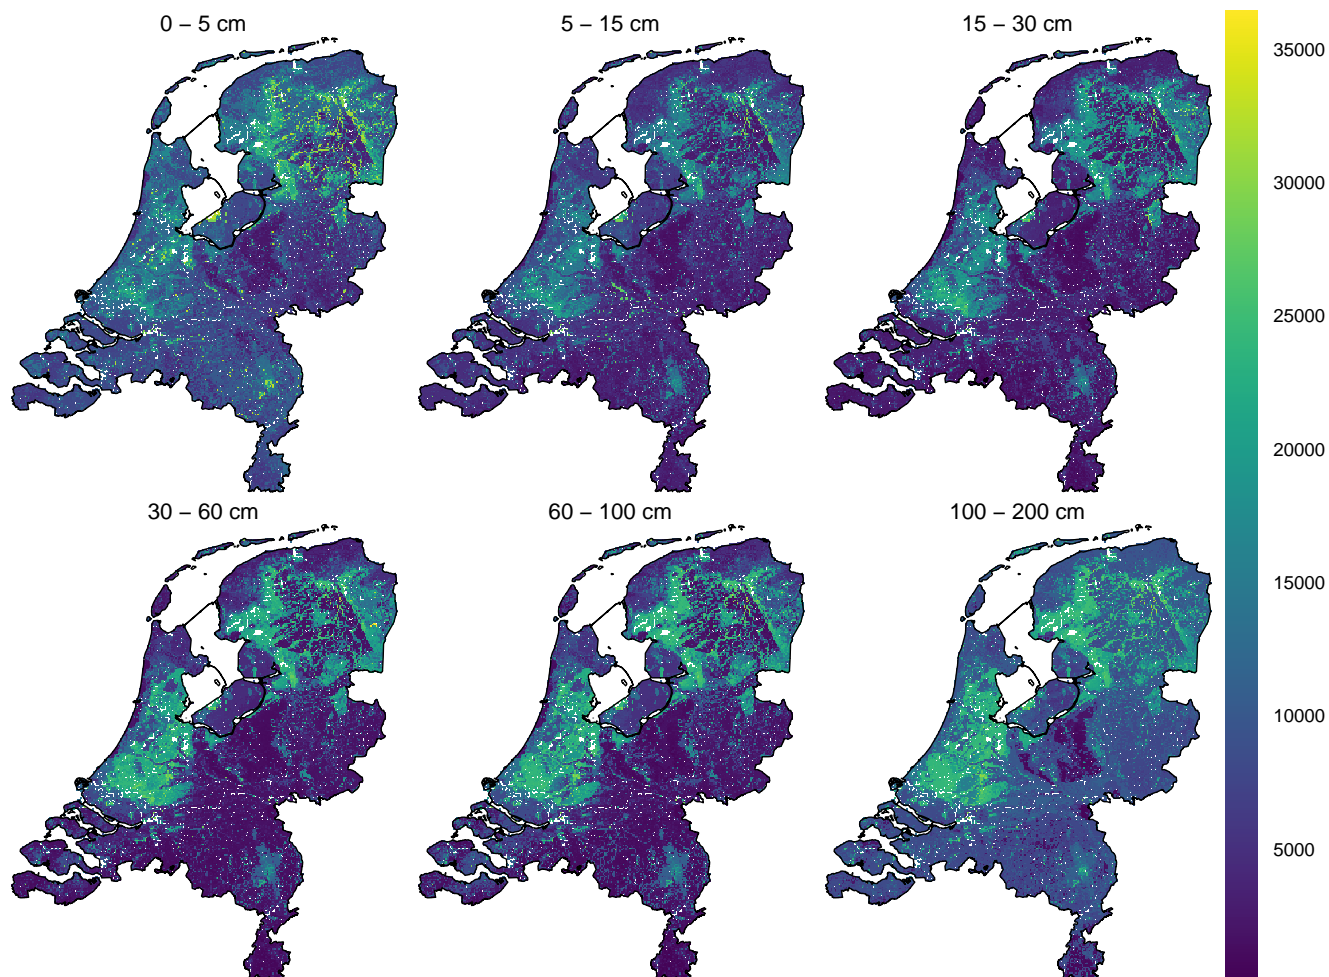

**Figure S74.** Maps of the PI90 as a measure of prediction uncertainty for  $N_{\text{tot}}$  [mg kg<sup>-1</sup>] for every GSM depth layer.

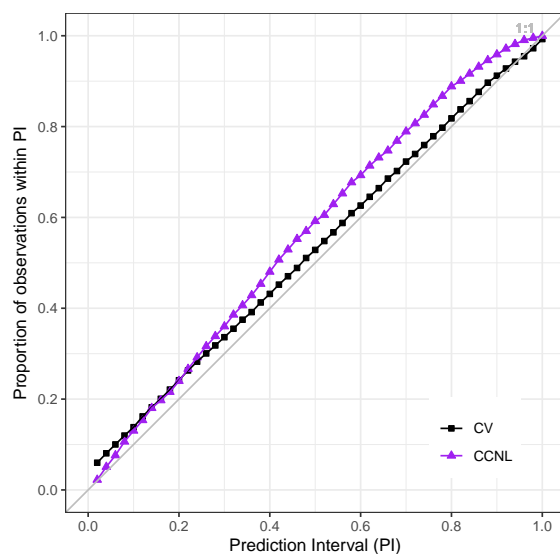

**Figure S75.** Prediction interval coverage probability (PICP) for prediction intervals between 0.02 and 1 of data used for different statistical validation strategies: 10-fold cross-validation of PFB laboratory measurements (CV) and CCNL laboratory measurements (Sect. 2.6). The closer the points are to the 1:1 line, the more accurate the prediction uncertainty. Lines connecting the points do not represent actual data and are only for visual guidance.

**Table S7.** Model accuracy metrics of mean and median  $N_{\text{tot}}$  [ $\text{mg kg}^{-1}$ ] predictions using design-based inference of CCNL laboratory measurements (Sect. 2.6). ME = mean error; RMSE = root mean squared error; MEC = model efficiency coefficient; PICP90 = prediction interval coverage probability of the PI90. The lower and upper 97.5 % confidence limits of the accuracy metrics were computed using design-based inference according to de Gruijter et al. (2006) and Sect. 2.6.2 of Helfenstein et al. (2022). Together, the lower and upper 97.5 % confidence limits give the 95 % confidence interval (CI95). For the 100–200 cm depth layer, metrics are based on 10-fold cross-validation of PFB laboratory measurements and thus without CI95 because laboratory measurements were not available from CCNL below 100 cm (Sect. 2.1.2 & 2.6).

| Prediction | Depth (cm) | n    | ME           | CI95 of ME   | RMSE        | CI95 of RMSE | MEC         | CI95 of MEC | PICP90      |
|------------|------------|------|--------------|--------------|-------------|--------------|-------------|-------------|-------------|
| Mean       | 0 - 15     | 1144 | <b>-511</b>  | -612, -410   | <b>2165</b> | 2001, 2318   | <b>0.44</b> | 0.34, 0.52  | <b>0.95</b> |
|            | 15 - 30    | 1144 | <b>-511</b>  | -612, -410   | <b>2165</b> | 2001, 2318   | <b>0.44</b> | 0.34, 0.52  | <b>0.95</b> |
|            | 30 - 60    | 1140 | <b>-1407</b> | -1524, -1290 | <b>2981</b> | 2796, 3156   | <b>0.27</b> | 0.13, 0.39  | <b>0.97</b> |
|            | 60 - 100   | 1140 | <b>-1408</b> | -1525, -1290 | <b>2981</b> | 2796, 3156   | <b>0.27</b> | 0.13, 0.39  | <b>0.97</b> |
|            | 100 - 200  | 149  | <b>-221</b>  | -            | <b>3530</b> | -            | <b>0.67</b> | -           | <b>0.89</b> |
| Median     | 0 - 15     | 1144 | <b>120</b>   | 22, 218      | <b>1994</b> | 1809, 2164   | <b>0.52</b> | 0.44, 0.59  | <b>0.95</b> |
|            | 15 - 30    | 1144 | <b>120</b>   | 22, 218      | <b>1994</b> | 1809, 2164   | <b>0.52</b> | 0.44, 0.59  | <b>0.95</b> |
|            | 30 - 60    | 1140 | <b>-609</b>  | -732, -485   | <b>2678</b> | 2446, 2892   | <b>0.41</b> | 0.29, 0.52  | <b>0.97</b> |
|            | 60 - 100   | 1140 | <b>-609</b>  | -732, -486   | <b>2678</b> | 2446, 2892   | <b>0.41</b> | 0.29, 0.52  | <b>0.97</b> |
|            | 100 - 200  | 149  | <b>408</b>   | -            | <b>3788</b> | -            | <b>0.62</b> | -           | <b>0.89</b> |



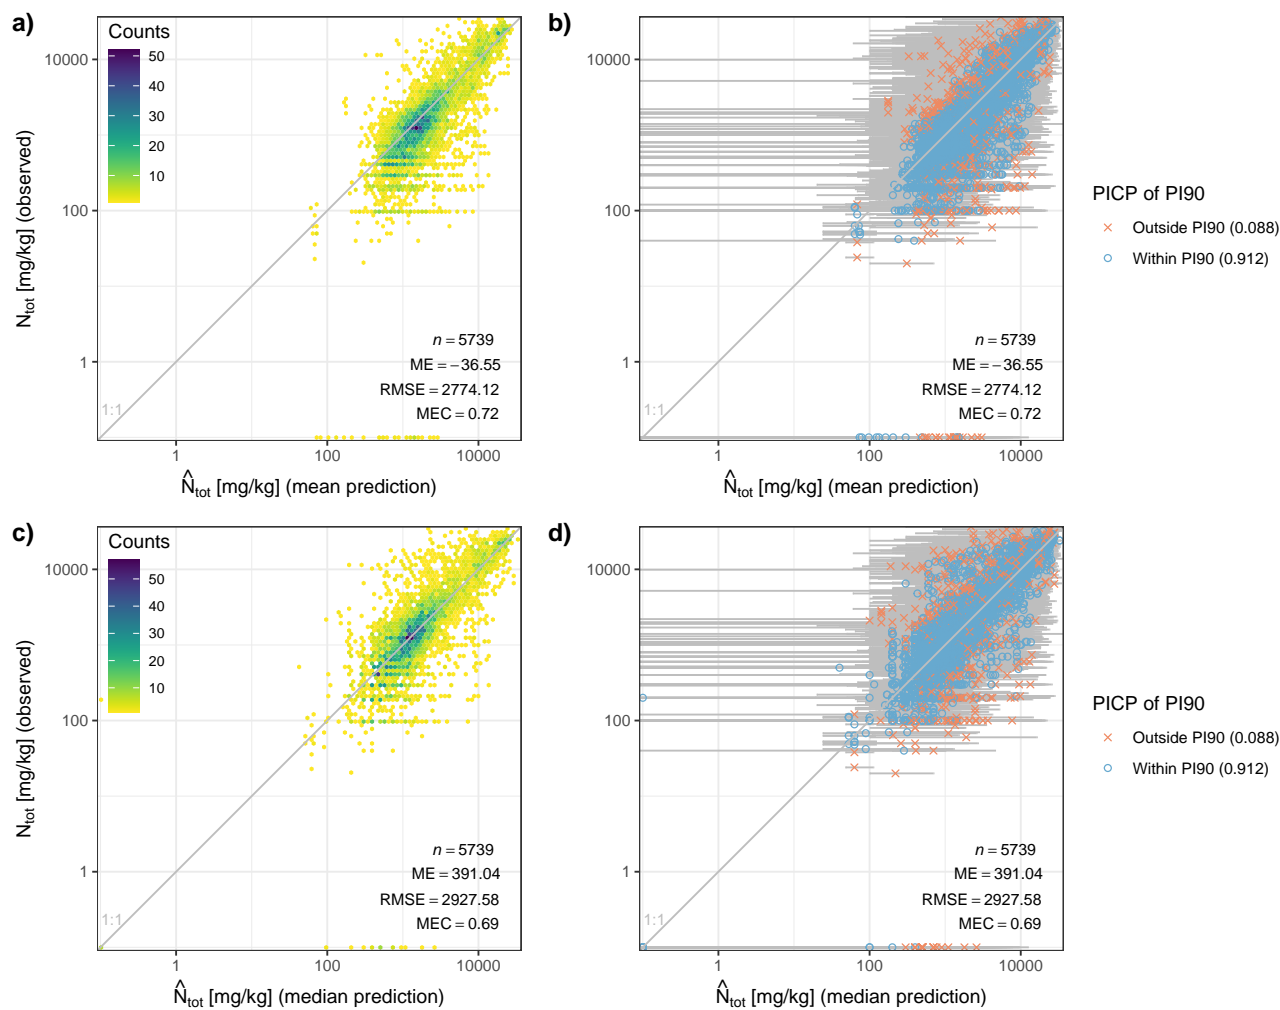

**Figure S76.** Predicted mean (a & b) and median (c & d)  $N_{tot}$  [mg kg<sup>-1</sup>] on the x-axis vs. measured  $N_{tot}$  [mg kg<sup>-1</sup>] on the y-axis (log-scale). Accuracy plots and metrics (ME, RMSE and MEC) were computed using 10-fold cross-validation of PFB laboratory measurements (Sect. 2.6). Plots a & c emphasize point density whereas plots b & d visualize prediction uncertainty (PI90 as error bars) and the PICIP90 in the figure legends.

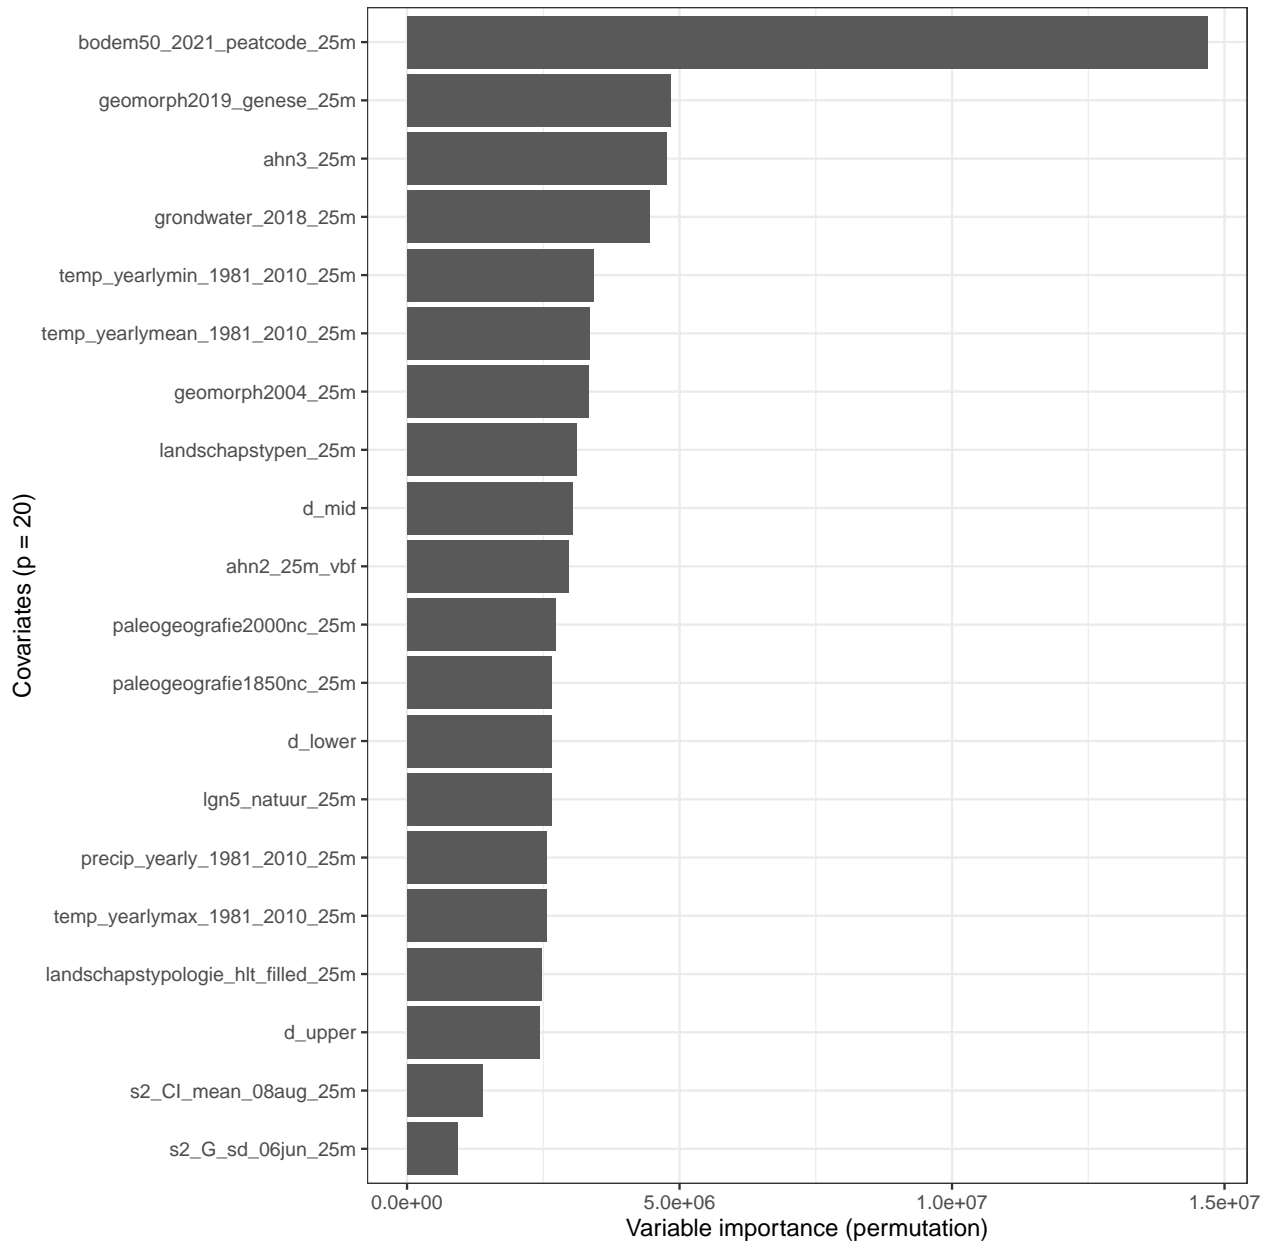

**Figure S77.** Variable importance for predicting  $N_{tot}$ , assessed using the permutation method (Breiman, 2002) (Sect. 2.4). A description of the covariate names (y-axis) can be found in the model code (<https://git.wur.nl/helfe001/bis-4d>) and covariate dataset (Helfenstein et al., 2024a). "d\_upper", "d\_mid" and "d\_lower" denote the upper, midpoint and lower boundary of a sampled soil horizon during calibration and target depth layer during prediction (Sect. 2.2, Table 5).

## S8 Oxalate-extractable P ( $P_{ox}$ )

### S8.1 Prediction maps

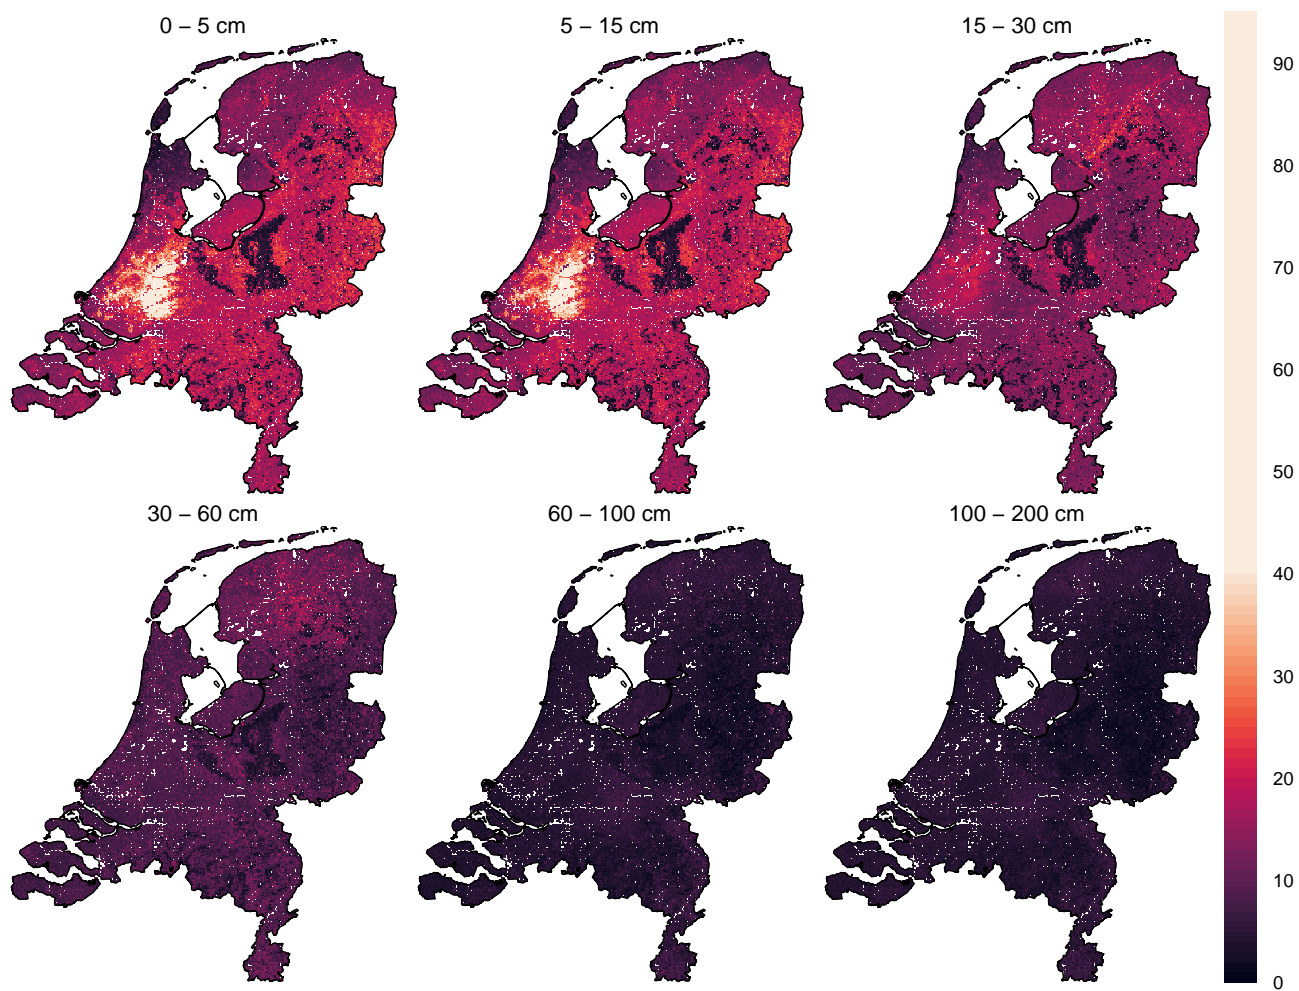

**Figure S78.** Predicted mean  $P_{ox}$  [ $\text{mmol kg}^{-1}$ ] for every GSM depth layer.

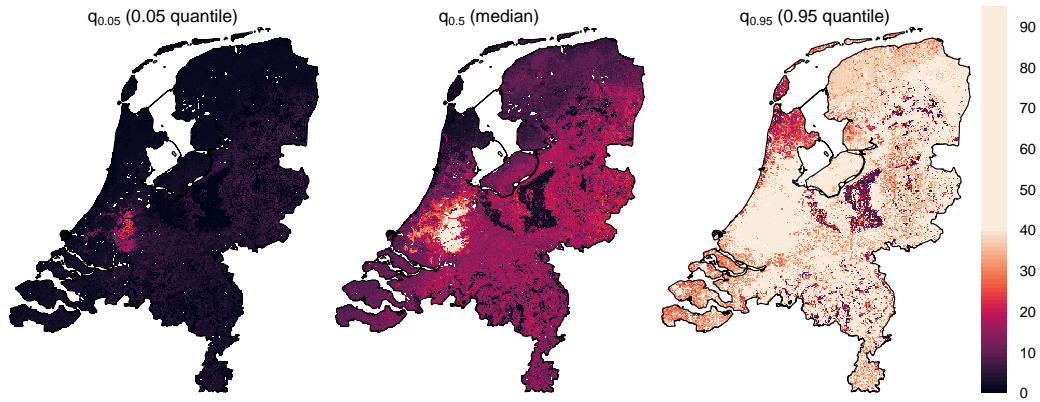

**Figure S79.** Predicted 5<sup>th</sup>, 50<sup>th</sup> (median) and 95<sup>th</sup> quantile for  $P_{ox}$  [mmol kg<sup>-1</sup>] from 0–5 cm depth.

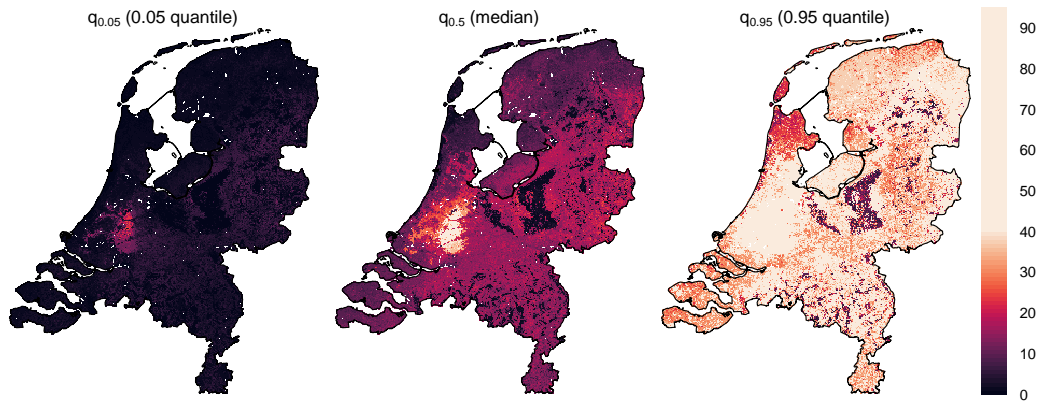

**Figure S80.** Predicted 5<sup>th</sup>, 50<sup>th</sup> (median) and 95<sup>th</sup> quantile for  $P_{ox}$  [mmol kg<sup>-1</sup>] from 5–15 cm depth.

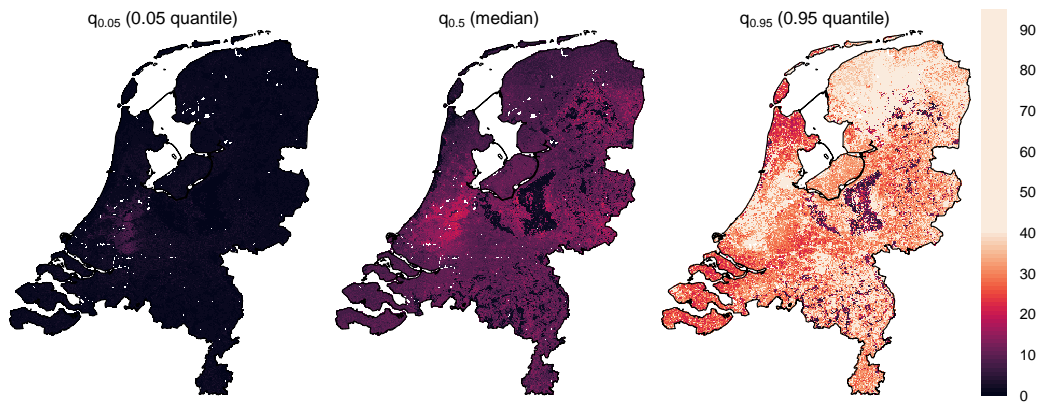

**Figure S81.** Predicted 5<sup>th</sup>, 50<sup>th</sup> (median) and 95<sup>th</sup> quantile for  $P_{ox}$  [mmol kg<sup>-1</sup>] from 15–30 cm depth.

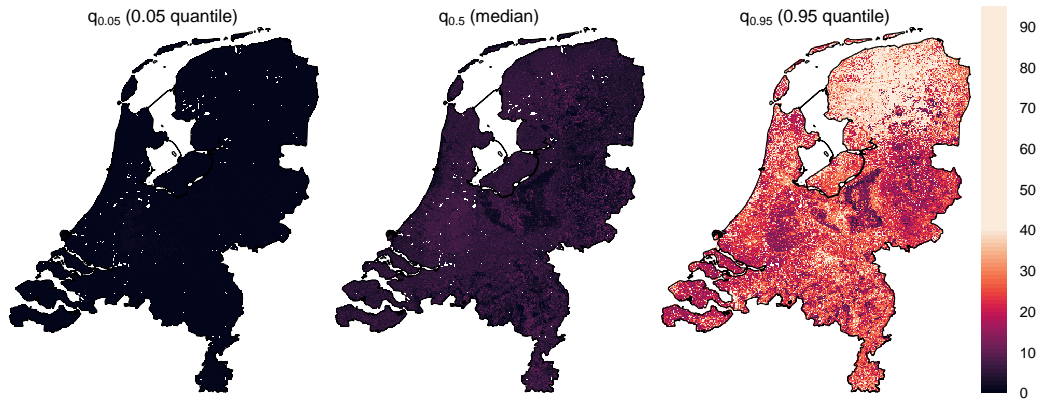

**Figure S82.** Predicted 5<sup>th</sup>, 50<sup>th</sup> (median) and 95<sup>th</sup> quantile for  $P_{ox}$  [mmol kg<sup>-1</sup>] from 30–60 cm depth.

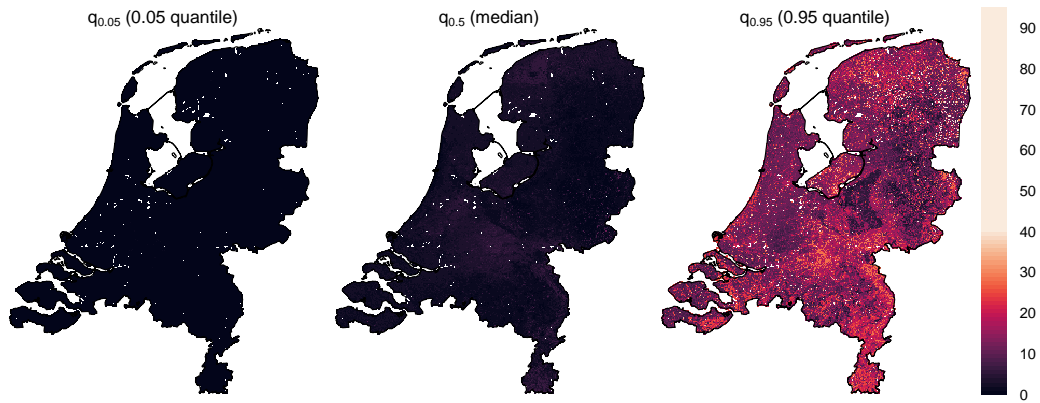

**Figure S83.** Predicted 5<sup>th</sup>, 50<sup>th</sup> (median) and 95<sup>th</sup> quantile for  $P_{ox}$  [mmol kg<sup>-1</sup>] from 60–100 cm depth.

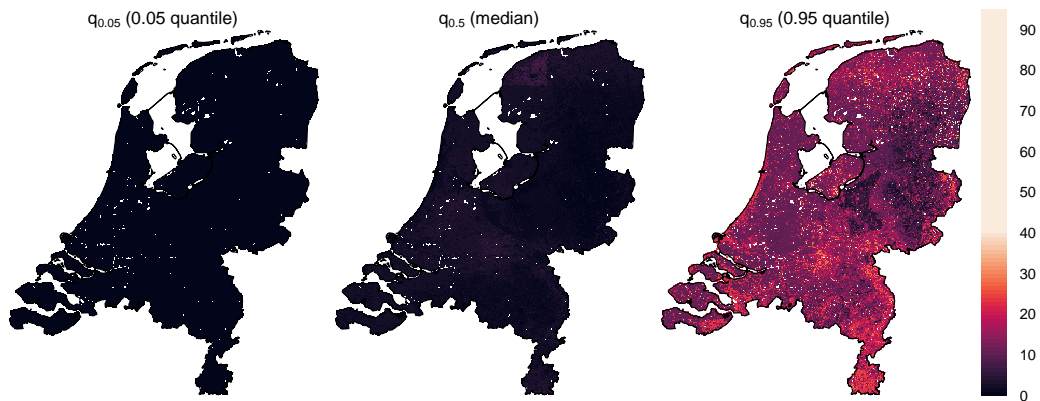

**Figure S84.** Predicted 5<sup>th</sup>, 50<sup>th</sup> (median) and 95<sup>th</sup> quantile for  $P_{ox}$  [mmol kg<sup>-1</sup>] from 100–200 cm depth.

## S8.2 Accuracy assessment

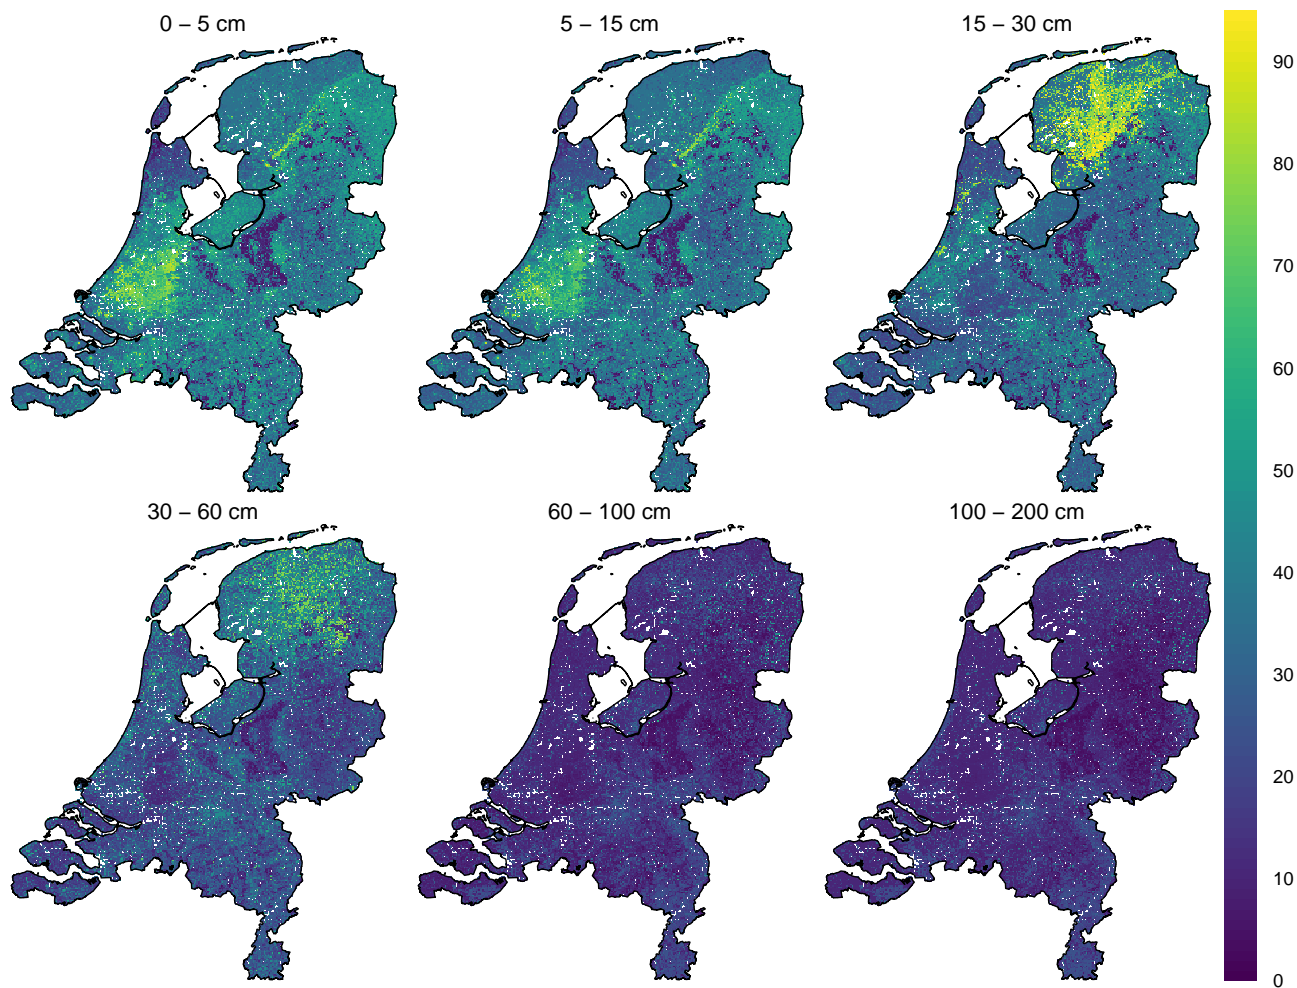

**Figure S85.** Maps of the PI90 as a measure of prediction uncertainty for  $P_{ox}$  [mmol kg<sup>-1</sup>] for every GSM depth layer.

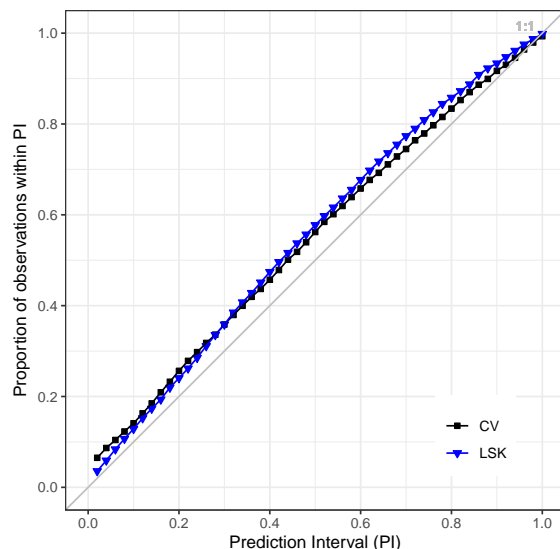

**Figure S86.** Prediction interval coverage probability (PICP) for prediction intervals between 0.02 and 1 of data used for different statistical validation strategies: 10-fold cross-validation of PFB laboratory measurements (CV) and LSK laboratory measurements (Sect. 2.6). The closer the points are to the 1:1 line, the more accurate the prediction uncertainty. Lines connecting the points do not represent actual data and are only for visual guidance.

**Table S8.** Model accuracy metrics of mean and median  $P_{ox}$  [ $\text{mmol kg}^{-1}$ ] predictions using design-based inference of LSK laboratory measurements (Sect. 2.6). ME = mean error; RMSE = root mean squared error; MEC = model efficiency coefficient; PICP90 = prediction interval coverage probability of the PI90. The lower and upper 97.5 % confidence limits of the accuracy metrics were computed using design-based inference according to de Gruijter et al. (2006) and Sect. 2.6.2 of Helfenstein et al. (2022). Together, the lower and upper 97.5 % confidence limits give the 95 % confidence interval (CI95).

| Prediction | Depth (cm) | n    | ME           | CI95 of ME   | RMSE        | CI95 of RMSE | MEC          | CI95 of MEC  | PICP90      |
|------------|------------|------|--------------|--------------|-------------|--------------|--------------|--------------|-------------|
| Mean       | 0 - 15     | 1341 | <b>-1.27</b> | -1.73, -0.8  | <b>8.71</b> | 8.09, 9.29   | <b>0.25</b>  | 0.19, 0.3    | <b>0.94</b> |
|            | 15 - 30    | 279  | <b>-2.92</b> | -3.87, -1.96 | <b>7.29</b> | 6.13, 8.29   | <b>0.17</b>  | 0.03, 0.28   | <b>0.94</b> |
|            | 30 - 60    | 1422 | <b>-2.2</b>  | -2.58, -1.82 | <b>7.7</b>  | 6.94, 8.4    | <b>-0.11</b> | -0.21, -0.05 | <b>0.94</b> |
|            | 60 - 100   | 1342 | <b>-0.19</b> | -0.52, 0.15  | <b>6.03</b> | 4.78, 7.07   | <b>0.04</b>  | 0.01, 0.07   | <b>0.92</b> |
|            | 100 - 200  | 948  | <b>-0.86</b> | -1.15, -0.57 | <b>4.16</b> | 3.6, 4.65    | <b>0.04</b>  | -0.03, 0.09  | <b>0.93</b> |
| Median     | 0 - 15     | 1341 | <b>1.65</b>  | 1.17, 2.12   | <b>8.97</b> | 8.23, 9.66   | <b>0.2</b>   | 0.14, 0.26   | <b>0.94</b> |
|            | 15 - 30    | 279  | <b>0.16</b>  | -0.77, 1.09  | <b>6.31</b> | 4.7, 7.59    | <b>0.38</b>  | 0.3, 0.46    | <b>0.94</b> |
|            | 30 - 60    | 1422 | <b>1.23</b>  | 0.88, 1.59   | <b>7.12</b> | 6.15, 7.97   | <b>0.05</b>  | 0.02, 0.09   | <b>0.94</b> |
|            | 60 - 100   | 1342 | <b>1.71</b>  | 1.39, 2.04   | <b>6.13</b> | 4.83, 7.2    | <b>0</b>     | -0.02, 0.04  | <b>0.92</b> |
|            | 100 - 200  | 948  | <b>0.86</b>  | 0.58, 1.14   | <b>4.01</b> | 3.31, 4.59   | <b>0.11</b>  | 0.07, 0.15   | <b>0.93</b> |



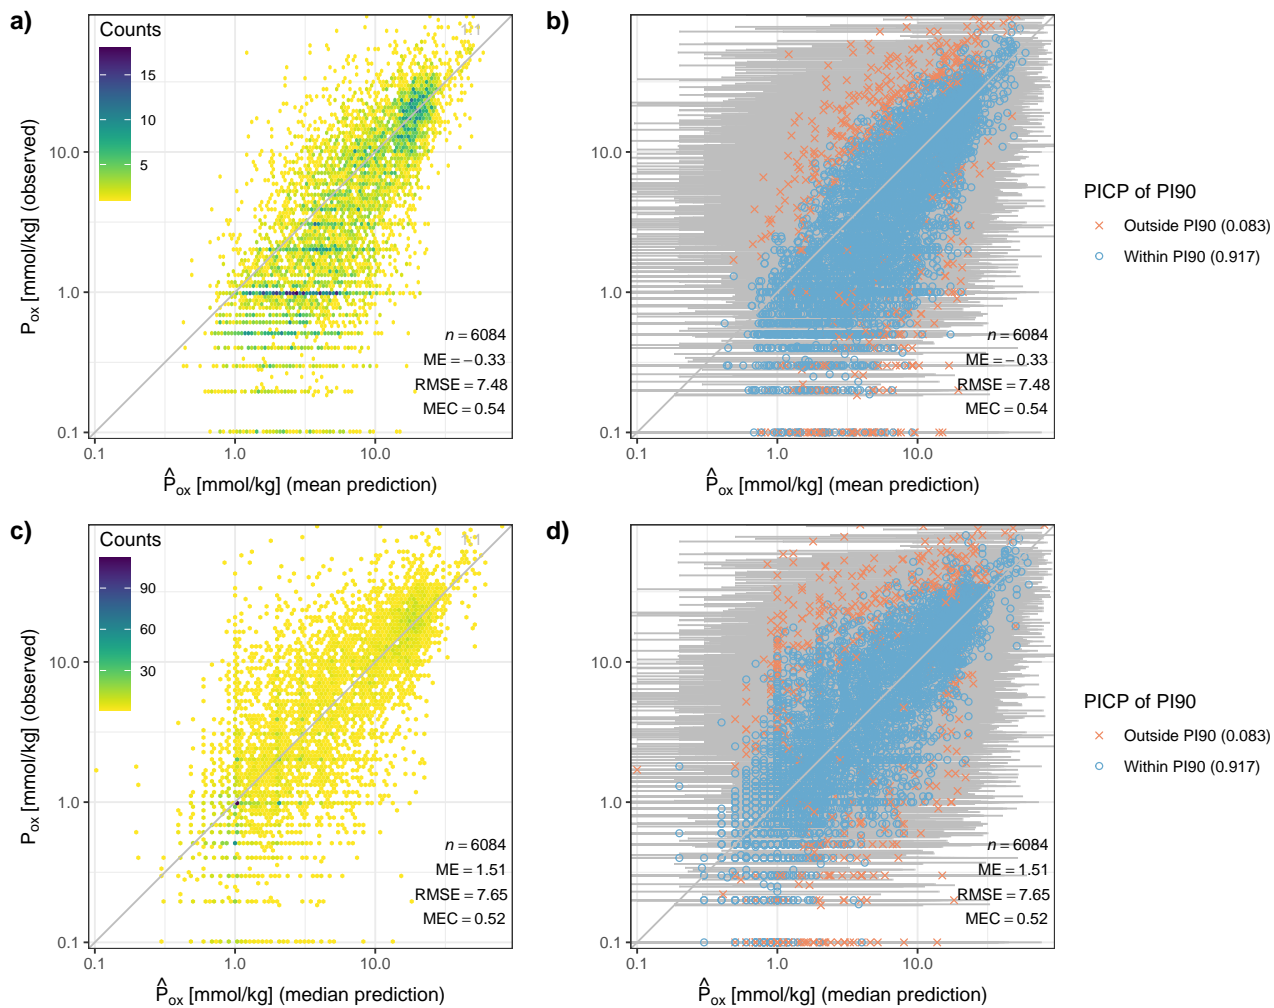

**Figure S87.** Predicted mean (a & b) and median (c & d)  $P_{ox}$  [mmol kg<sup>-1</sup>] on the x-axis vs. measured  $P_{ox}$  [mmol kg<sup>-1</sup>] on the y-axis (log-scale). Accuracy plots and metrics (ME, RMSE and MEC) were computed using 10-fold cross-validation of PFB laboratory measurements (Sect. 2.6). Plots a & c emphasize point density whereas plots b & d visualize prediction uncertainty (PI90 as error bars) and the PICP90 in the figure legends.

### S8.3 Variable importance

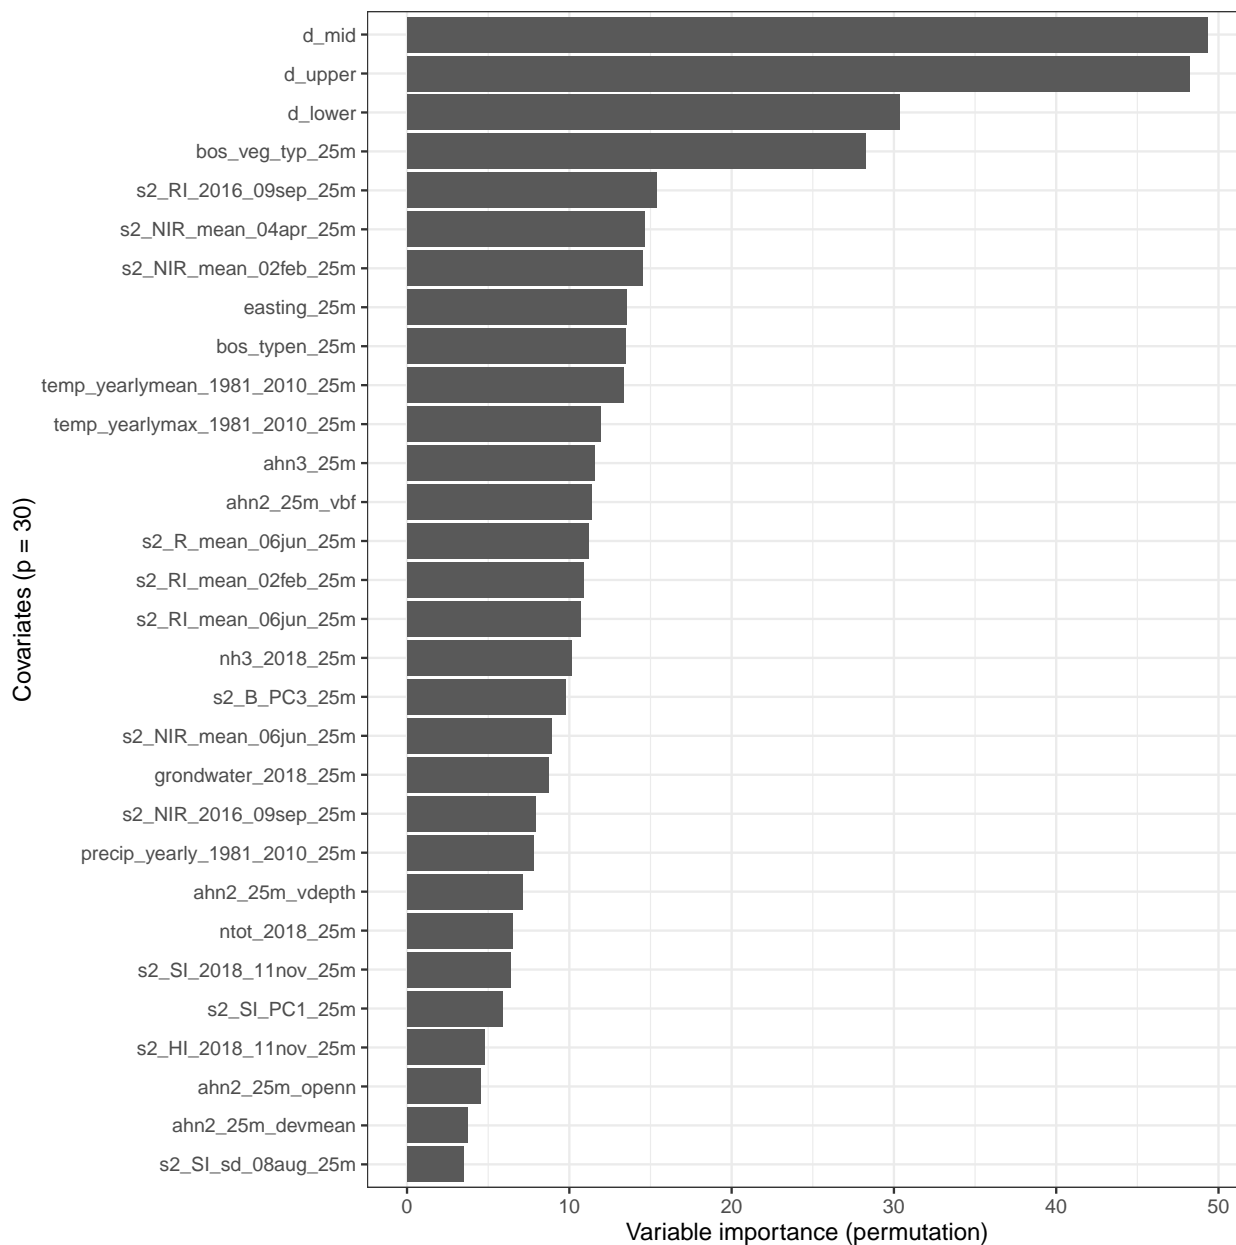

**Figure S88.** Variable importance for predicting  $P_{ox}$ , assessed using the permutation method (Breiman, 2002) (Sect. 2.4). A description of the covariate names (y-axis) can be found in the model code (<https://git.wur.nl/helfe001/bis-4d>) and covariate dataset (Helfenstein et al., 2024a). "d\_upper", "d\_mid" and "d\_lower" denote the upper, midpoint and lower boundary of a sampled soil horizon during calibration and target depth layer during prediction (Sect. 2.2, Table 5).

S9.1 Prediction maps

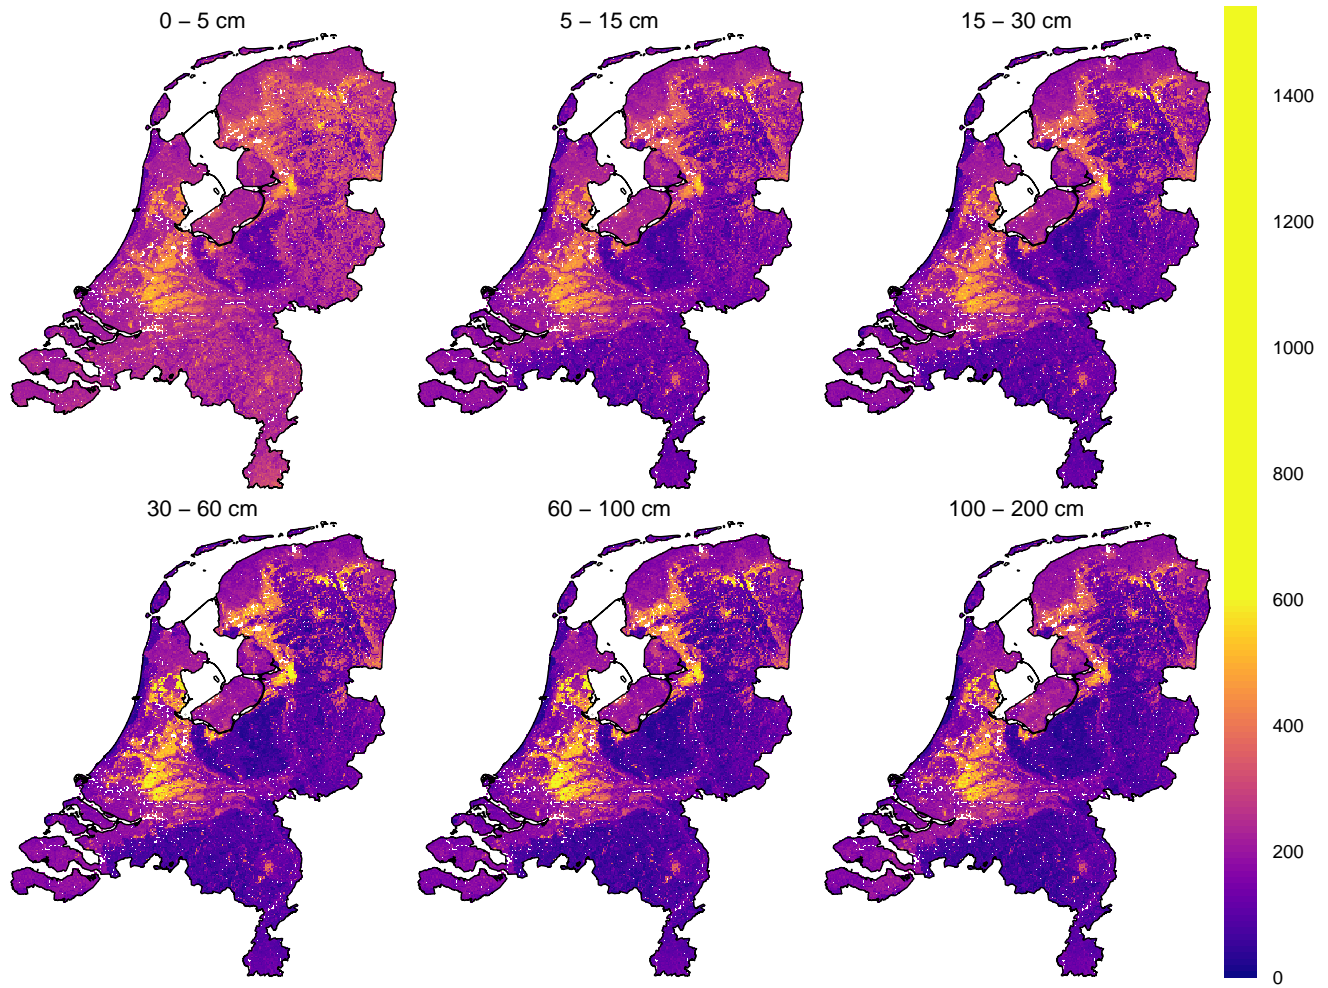

Figure S89. Predicted mean CEC [ $\text{mmol(c) kg}^{-1}$ ] for every GSM depth layer.

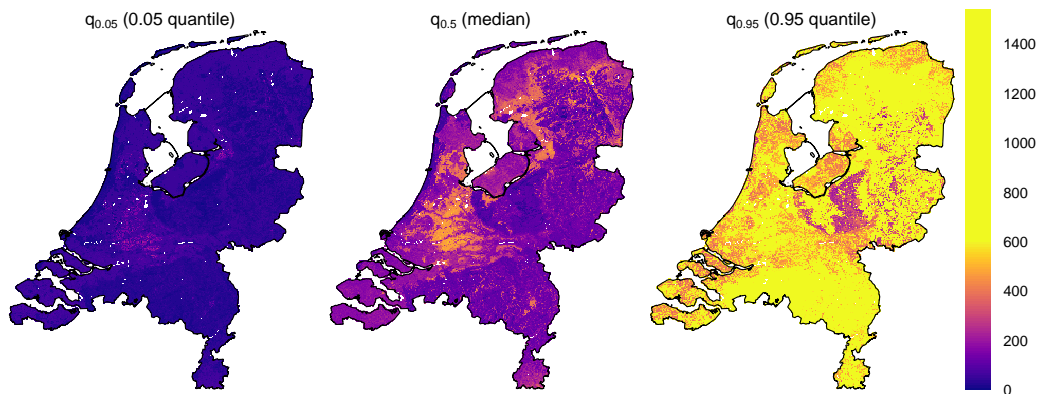

**Figure S90.** Predicted 5<sup>th</sup>, 50<sup>th</sup> (median) and 95<sup>th</sup> quantile for CEC [mmol(c) kg<sup>-1</sup>] from 0–5 cm depth.

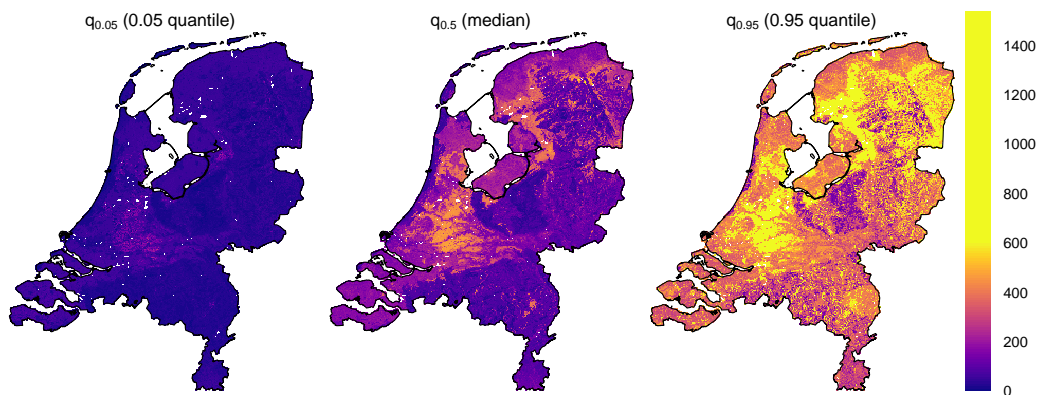

**Figure S91.** Predicted 5<sup>th</sup>, 50<sup>th</sup> (median) and 95<sup>th</sup> quantile for CEC [mmol(c) kg<sup>-1</sup>] from 5–15 cm depth.

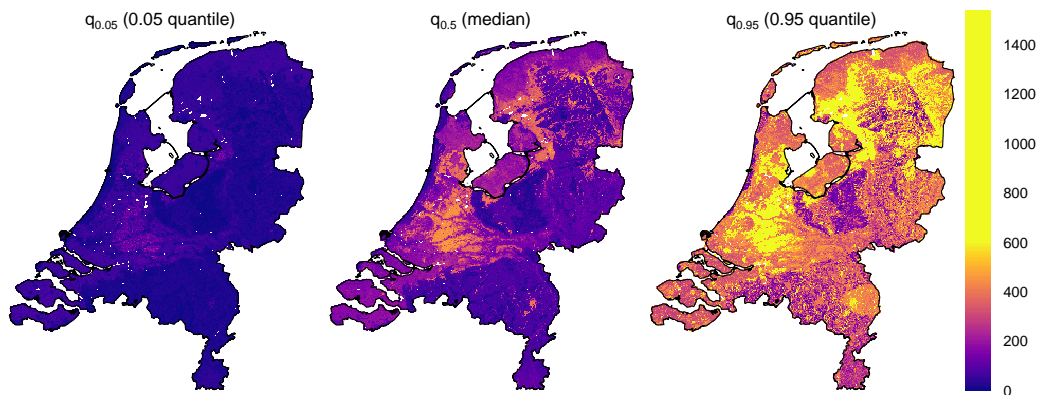

**Figure S92.** Predicted 5<sup>th</sup>, 50<sup>th</sup> (median) and 95<sup>th</sup> quantile for CEC [mmol(c) kg<sup>-1</sup>] from 15–30 cm depth.

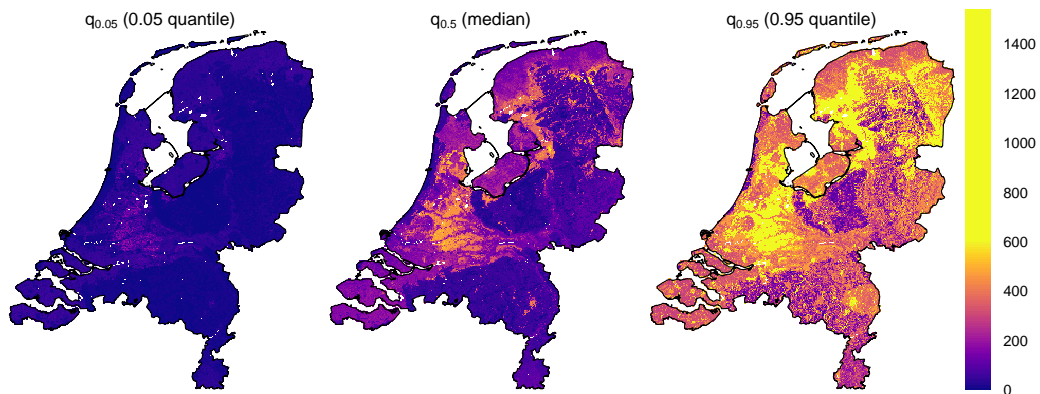

**Figure S93.** Predicted 5<sup>th</sup>, 50<sup>th</sup> (median) and 95<sup>th</sup> quantile for CEC [mmol(c) kg<sup>-1</sup>] from 30–60 cm depth.

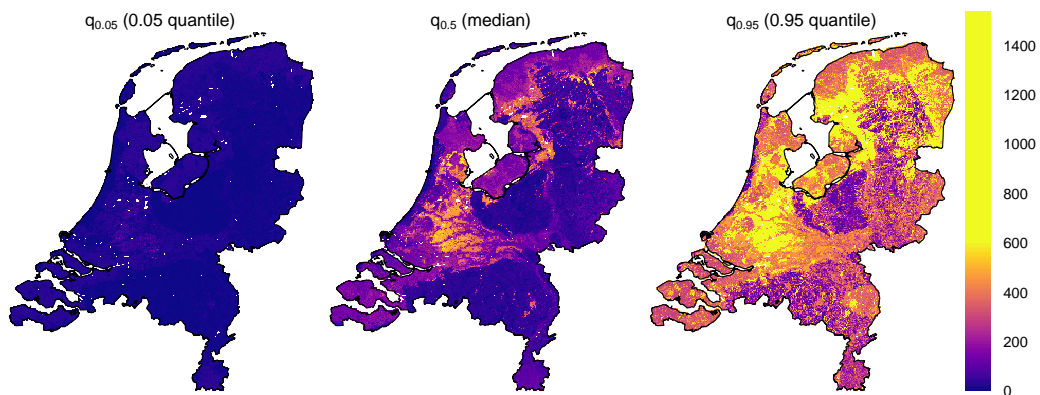

**Figure S94.** Predicted 5<sup>th</sup>, 50<sup>th</sup> (median) and 95<sup>th</sup> quantile for CEC [mmol(c) kg<sup>-1</sup>] from 60–100 cm depth.

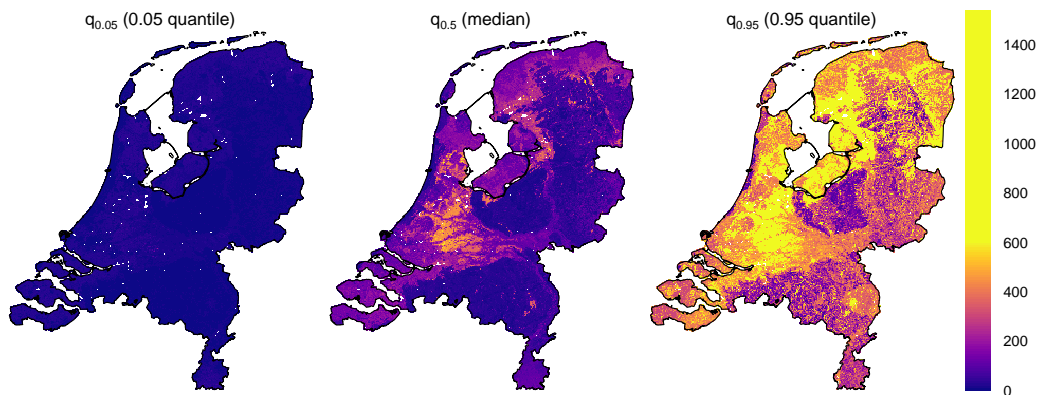

**Figure S95.** Predicted 5<sup>th</sup>, 50<sup>th</sup> (median) and 95<sup>th</sup> quantile for CEC [mmol(c) kg<sup>-1</sup>] from 100–200 cm depth.



## S9.2 Accuracy assessment

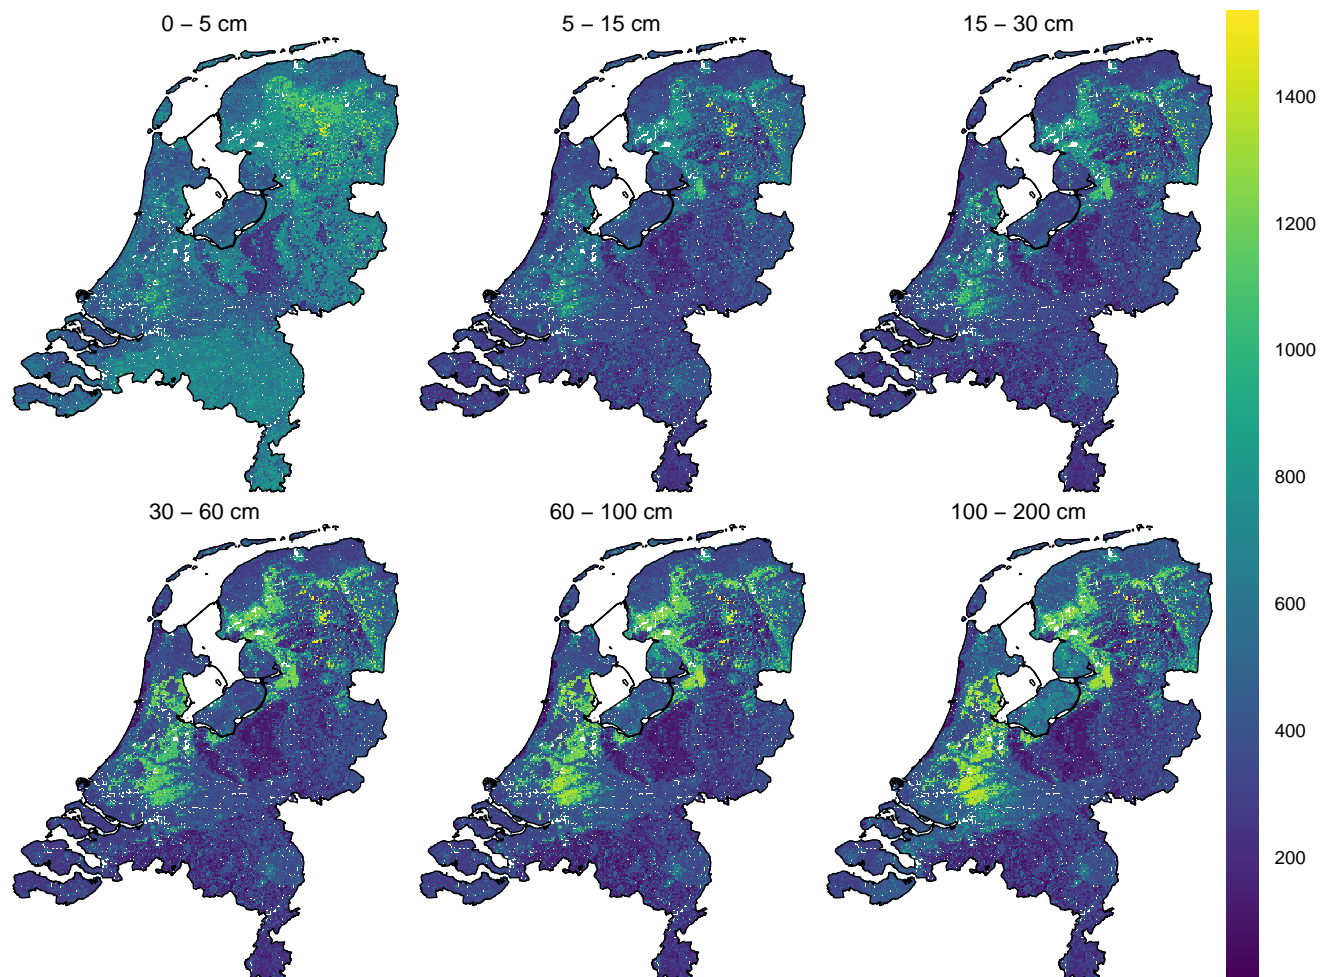

**Figure S96.** Maps of the PI90 as a measure of prediction uncertainty for CEC [ $\text{mmol(c) kg}^{-1}$ ] for every GSM depth layer.

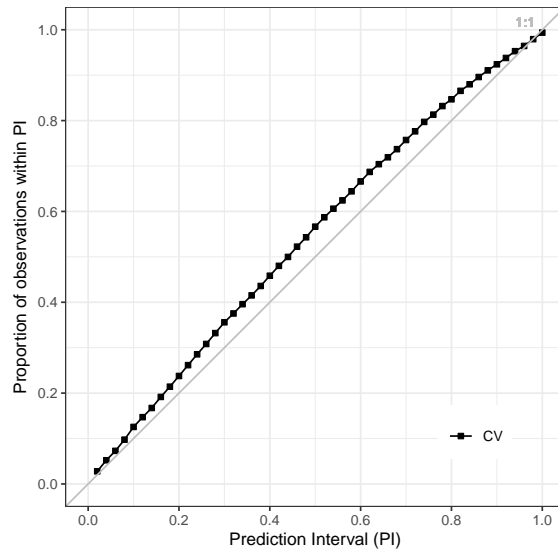

**Figure S97.** Prediction interval coverage probability (PICP) for prediction intervals between 0.02 and 1 of the PFB laboratory measurements used for 10-fold cross-validation (CV). The closer the points are to the 1:1 line, the more accurate the prediction uncertainty. Lines connecting the points do not represent actual data and are only for visual guidance.

**Table S9.** Model accuracy metrics of mean and median CEC [mmol(c) kg<sup>-1</sup>] predictions using 10-fold cross-validation of PFB laboratory measurements (Sect. 2.6). Note that CEC was not measured in LSK or CCNL so design-based inference and computing 95 % confidence intervals (CI95) was not possible (Sect. 2.1.2). ME = mean error; RMSE = root mean squared error; MEC = model efficiency coefficient; PICP90 = prediction interval coverage probability of the PI90.

| Prediction | Depth (cm) | n    | ME            | CI95 of ME | RMSE       | CI95 of RMSE | MEC         | CI95 of MEC | PICP90      |
|------------|------------|------|---------------|------------|------------|--------------|-------------|-------------|-------------|
| Mean       | 0 - 15     | 1489 | <b>-5.12</b>  | -          | <b>114</b> | -            | <b>0.59</b> | -           | <b>0.93</b> |
|            | 15 - 30    | 502  | <b>6.47</b>   | -          | <b>132</b> | -            | <b>0.49</b> | -           | <b>0.95</b> |
|            | 30 - 60    | 824  | <b>-0.25</b>  | -          | <b>142</b> | -            | <b>0.47</b> | -           | <b>0.92</b> |
|            | 60 - 100   | 728  | <b>-3.69</b>  | -          | <b>156</b> | -            | <b>0.38</b> | -           | <b>0.91</b> |
|            | 100 - 200  | 269  | <b>-24.02</b> | -          | <b>123</b> | -            | <b>0.16</b> | -           | <b>0.9</b>  |
| Median     | 0 - 15     | 1489 | <b>22.51</b>  | -          | <b>119</b> | -            | <b>0.56</b> | -           | <b>0.93</b> |
|            | 15 - 30    | 502  | <b>32.97</b>  | -          | <b>140</b> | -            | <b>0.43</b> | -           | <b>0.95</b> |
|            | 30 - 60    | 824  | <b>29</b>     | -          | <b>149</b> | -            | <b>0.42</b> | -           | <b>0.92</b> |
|            | 60 - 100   | 728  | <b>28.75</b>  | -          | <b>159</b> | -            | <b>0.36</b> | -           | <b>0.91</b> |
|            | 100 - 200  | 269  | <b>13.51</b>  | -          | <b>115</b> | -            | <b>0.26</b> | -           | <b>0.9</b>  |



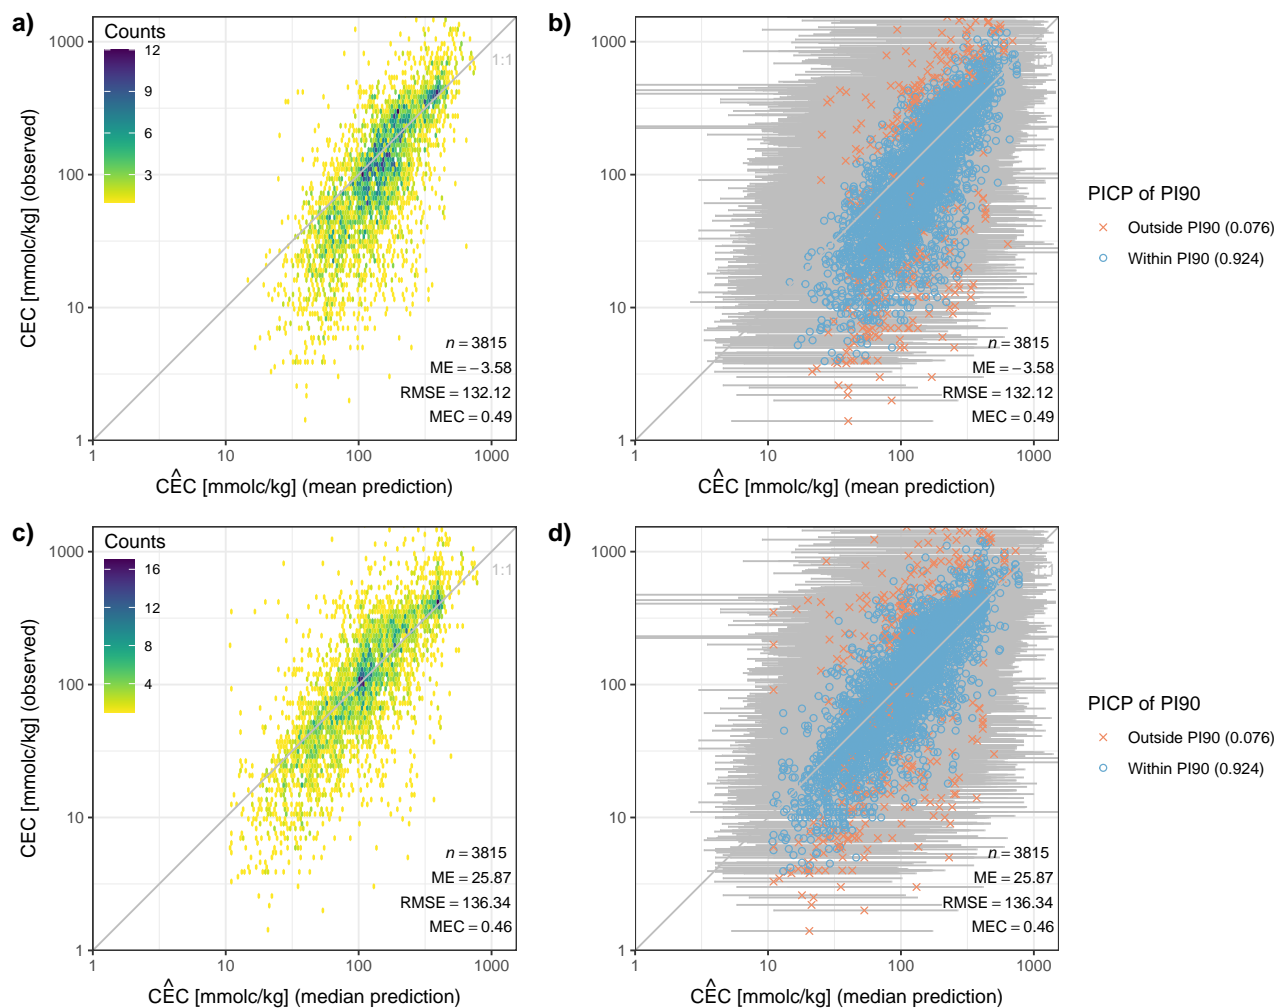

**Figure S98.** Predicted mean (a & b) and median (c & d) CEC [mmol(c) kg<sup>-1</sup>] on the x-axis vs. measured CEC [mmol(c) kg<sup>-1</sup>] on the y-axis (log-scale). Accuracy plots and metrics (ME, RMSE and MEC) were computed using 10-fold cross-validation of PFB laboratory measurements (Sect. 2.6). Plots a & c emphasize point density whereas plots b & d visualize prediction uncertainty (PI90 as error bars) and the PICP90 in the figure legends.

### S9.3 Variable importance

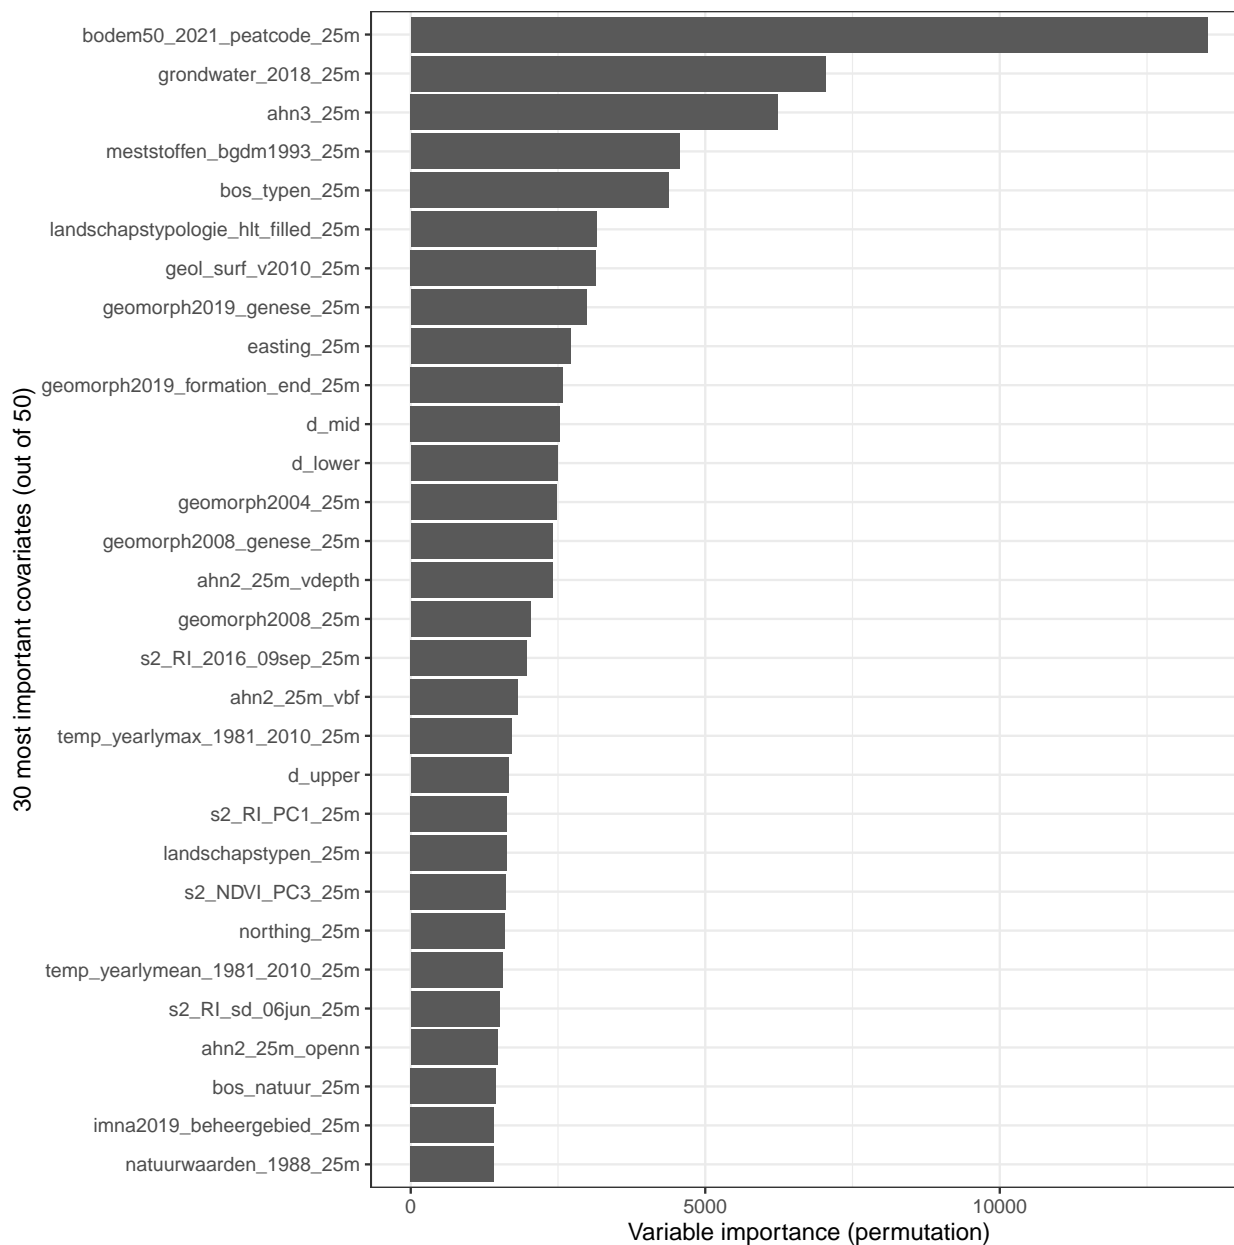

**Figure S99.** Variable importance for predicting CEC, assessed using the permutation method (Breiman, 2002) (Sect. 2.4). A description of the covariate names (y-axis) can be found in the model code (<https://git.wur.nl/helfe001/bis-4d>) and covariate dataset (Helfenstein et al., 2024a). "d\_upper", "d\_mid" and "d\_lower" denote the upper, midpoint and lower boundary of a sampled soil horizon during calibration and target depth layer during prediction (Sect. 2.2, Table 5).

## References

- 75 Arrouays, D., McBratney, A., Minasny, B., Hempel, J., Heuvelink, G.B.M., MacMillan, R.A., Hartemink, A., Lagacherie, P., McKenzie, N., 2015. The GlobalSoilMap project specifications, in: Proceedings of the 1st GlobalSoilMap Conference, pp. 9–12. URL: [https://www.isric.org/sites/default/files/GlobalSoilMap\\_specifications\\_december\\_2015\\_2.pdf](https://www.isric.org/sites/default/files/GlobalSoilMap_specifications_december_2015_2.pdf), doi:<https://doi.org/10.1201/b16500-4>.
- Breiman, L., 2002. Manual on Setting Up, Using, and Understanding Random Forests v3.1. Technical report [ftp://ftp.stat.berkeley.edu/pub/users/breiman/Using\\_random\\_forests\\_v3.1.pdf](ftp://ftp.stat.berkeley.edu/pub/users/breiman/Using_random_forests_v3.1.pdf). URL: [ftp://ftp.stat.berkeley.edu/pub/users/breiman/Using\\_random\\_forests\\_v3.1.pdf](ftp://ftp.stat.berkeley.edu/pub/users/breiman/Using_random_forests_v3.1.pdf).
- 80 de Gruijter, J.J., Brus, D., Bierkens, M., Knotters, M., 2006. Sampling for Natural Resource Monitoring. Springer, The Netherlands.
- Helfenstein, A., Mulder, V.L., Hack-ten Broeke, M.J., van Doorn, M., Teuling, K., Walvoort, D.J., Heuvelink, G.B., 2024a. Spatially explicit environmental variables at 25m resolution for spatial modelling in the Netherlands. URL: <https://doi.org/10.4121/6af610ed-9006-4ac5-b399-4795c2ac01ec>, doi:<https://doi.org/10.4121/6AF610ED-9006-4AC5-B399-4795C2AC01EC.V1>.
- 85 Helfenstein, A., Mulder, V.L., Heuvelink, G.B., Okx, J.P., 2022. Tier 4 maps of soil pH at 25 m resolution for the Netherlands. *Geoderma* 410, 115659. URL: <https://linkinghub.elsevier.com/retrieve/pii/S0016706121007394>, doi:<https://doi.org/10.1016/j.geoderma.2021.115659>.
- Helfenstein, A., Mulder, V.L., Heuvelink, G.B.M., Hack-ten Broeke, M.J.D., 2024b. Three-dimensional space and time mapping reveals soil organic matter decreases across anthropogenic landscapes in the Netherlands. *Communications Earth & Environment* 5, 1–16. URL: <https://www.nature.com/articles/s43247-024-01293-y>, doi:<https://doi.org/10.1038/s43247-024-01293-y>. publisher: Nature Publishing Group.
- 90 Sandri, M., Zuccolotto, P., 2008. A Bias Correction Algorithm for the Gini Variable Importance Measure in Classification Trees. *Journal of Computational and Graphical Statistics* 17, 611–628. URL: <https://doi.org/10.1198/106186008X344522>, doi:<https://doi.org/10.1198/106186008X344522>. publisher: Taylor & Francis\_eprint: <https://doi.org/10.1198/106186008X344522>.
- Sandri, M., Zuccolotto, P., 2010. Analysis and correction of bias in Total Decrease in Node Impurity measures for tree-based algorithms. *Statistics and Computing* 20, 393–407. URL: <https://doi.org/10.1007/s11222-009-9132-0>, doi:<https://doi.org/10.1007/s11222-009-9132-0>.
- 95 0.
